# Supplementary material for: Construction of chiral chroman skeletons via catalytic asymmetric [4 + 2] cyclization of ortho-hydroxyphenyl-substituted para-quinone methides catalyzed by a chiral-at-metal rhodium complex
Source: Royal Society of Chemistry journal article supplement (doi:10.1039/d2qo00302c), 2022-01-01
Supplement: d2qo00302c1.pdf [file d2qo00302c1.pdf]

Supporting Information for:

**Construction of Chiral Chroman Skeletons *via* Catalytic Asymmetric  
[4+2] Cyclization of *ortho*-Hydroxyphenyl-Substituted *para*-Quinone  
Methides Catalyzed by Chiral-at-Metal Rhodium Complex**

Jian Yang<sup>†, a</sup>, Siliang Ming<sup>†, b</sup>, Gang Yao,<sup>a</sup> Haifeng Yu,<sup>a</sup> Yu Du,<sup>\*b</sup> and Jun Gong<sup>\*a</sup>

<sup>a</sup> School of Pharmacy, Hubei University of Science and Technology, Xianning, Hubei 437100, P. R. China. E-mail: gongjun@hbust.edu.cn

<sup>b</sup> State Key Laboratory of Structural Chemistry, Fujian Institute of Research on the Structure of Matter, Chinese Academy of Sciences, Fuzhou 350002, P. R. China. E-mail: duyue@fjirsm.ac.cn

<sup>†</sup> These authors contributed equally to this work.

## Contents

|                                                        |            |
|--------------------------------------------------------|------------|
| <b>1. General Information</b>                          | <b>3</b>   |
| <b>2. Synthesis of Catalysts</b>                       | <b>4</b>   |
| <b>3. Synthesis of Substrates</b>                      | <b>5</b>   |
| <b>4. Asymmetric [4+2] Cyclization Reactions</b>       | <b>6</b>   |
| <b>5. Synthetic Transformations</b>                    | <b>38</b>  |
| <b>6. <sup>1</sup>H and <sup>13</sup>C NMR Spectra</b> | <b>40</b>  |
| <b>7. HPLC Traces on Chiral Stationary Phase</b>       | <b>74</b>  |
| <b>8. Single Crystal X-Ray Diffraction Studies</b>     | <b>105</b> |
| <b>9. References</b>                                   | <b>107</b> |

## 1. General Information

All non-aqueous reactions were performed in oven-dried glassware and standard Schlenk tubes under an atmosphere of argon. Dichloromethane (DCM) and 1,2-dichloroethane (DCE) were distilled from CaH<sub>2</sub> under inert atmosphere. Tetrahydrofuran (THF) and toluene were distilled from sodium and benzophenone under inert atmosphere. All other solvents and reagents were used as received unless otherwise noted. Thin layer chromatography was performed using silica gel 60 F-254 precoated plates (0.2~0.3 mm) and visualized by short-wave UV (254 nm) irradiation, potassium permanganate, or iodine stain. Column chromatography was performed with silica gel (200-300 mesh, Yantai Jiangyou Silica Gel Development Co., Ltd). The <sup>1</sup>H, <sup>13</sup>C and <sup>19</sup>F NMR spectra were obtained in CDCl<sub>3</sub> using a Bruker-BioSpin AVANCE III HD 400 NMR spectrometer, respectively. Chemical shifts (δ) for <sup>1</sup>H NMR spectra are recorded in parts per million from tetramethylsilane with the solvent resonance as the internal standard (chloroform, δ 7.26 ppm). Data are reported as follows: chemical shift, multiplicity (s = singlet, d = doublet, t = triplet, q = quartet, qn = quintet, m = multiplet and br = broad), coupling constant in Hz, and integration. Chemical shifts for <sup>13</sup>C NMR spectra are recorded in parts per million from tetramethylsilane using the central peak of deuteriochloroform (δ 77.00 ppm) as the internal standard. The infrared spectra were recorded on a VERTEX 70 IR spectrometer as KBr pellets, with absorption reported in cm<sup>-1</sup>. Optical rotation was recorded on INESA SGW-1 polarimeter at concentrations of 0.5 g/100 mL or 1.0 g/100 mL. Enantiomeric excess was determined by HPLC analysis on Chiralpak column (Daicel Chemical Industries, LTD) on Shimadzu LC-20AD. High-resolution mass spectra were recorded on a Bruker Impact II UHR TOF LC/MS Mass Spectrometry.

## 2. Synthesis of Catalysts

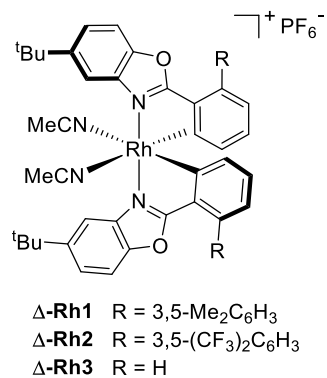

Racemic rhodium catalyst *rac*-**Rh3** and chiral catalyst  $\Delta$ -**Rh3**,  $\Lambda$ -**Rh3** were prepared according to reported procedures developed by Meggers' group.<sup>[1]</sup>  $\Delta$ -**Rh1**<sup>[2]</sup>,  $\Delta$ -**Rh2**<sup>[3]</sup> were synthesized following recently published procedures.



### 3. Synthesis of Substrates

#### 3.1 Synthesis of $\alpha,\beta$ -unsaturated 2-acylimidazoles

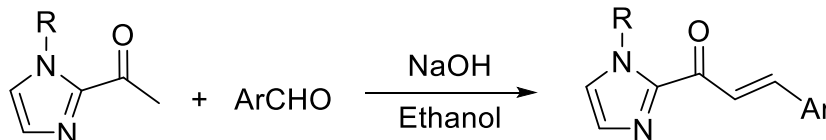

$\alpha,\beta$ -unsaturated 2-acylimidazoles **1** were prepared by *Aldol* reaction according to a reported procedure.<sup>[3]</sup> 2-acetyl-imidazole (10.0 mmol, 1.0 eq.) and ethanol (50 mL) were added to a 100 mL round-bottom flask followed by the aromatic aldehyde (12 mmol, 1.2 eq.) and NaOH (5 mmol, 0.5 eq.). The solution was stirred at room temperature until the substrates consumption (detected by TLC). The reaction mixture was then quenched with saturated aqueous  $\text{NH}_4\text{Cl}$  and the mixture was extracted with EtOAc ( $3 \times 30$  mL). The combined organic layer was washed with 50 mL brine and dried over anhydrous  $\text{Na}_2\text{SO}_4$ , filtered and concentrated under vacuum. The residue was purified by a flash column chromatography on silica gel to afford the desired product **1**.

Alkyl  $\alpha,\beta$ -unsaturated 2-acyl imidazole **1n** was prepared following aforesaid method in 80 °C overnight. **1o** was prepared according to published procedures.<sup>[4]</sup> **1r** was prepared according to published procedures.<sup>[5]</sup>

#### 3.2 Synthesis of *para*-quinone methides

The *para*-quinone methides **2** were prepared according to a reported method.<sup>[6]</sup>

## 4. Asymmetric [4+2] Cyclization Reactions

### 4.1 Synthesis of racemic products as HPLC references

**General Procedure:** A dried 25 mL Schlenk tube was charged with  $\alpha,\beta$ -unsaturated 2-acylimidazoles **1** (0.20 mmol), *para*-quinone methides (*p*-QMs) **2** (0.24 mmol),  $K_2CO_3$  (0.24 mmol) and racemic catalyst *rac*-**Rh3** (5.0 mg, 3.0 mol%). The tube was purged with argon, then anhydrous toluene (0.6 mL) was added. The reaction mixture was stirred at 50°C for indicated time (monitored by TLC) under argon. After cooling to room temperature, the mixture was purified by flash column chromatography on silica gel (petroleum ether/ EtOAc = 10:1 to 5:1) to afford racemic products as HPLC reference for determination of enantiomeric excess.

### 4.2 Substrate Scope

**General Procedure:** A dried 25 mL Schlenk tube was charged with  $\alpha,\beta$ -unsaturated 2-acylimidazoles **1** (0.20 mmol), *para*-quinone methides (*p*-QMs) **2** (0.24 mmol),  $K_2CO_3$  (0.24 mmol) and chiral catalyst  $\Delta$ -**Rh3** (5.0 mg, 3.0 mol%). The tube was purged with argon, then anhydrous toluene (0.6 mL) was added. The reaction mixture was stirred at 50°C for indicated time (monitored by TLC) under argon. After cooling to room temperature, the mixture was purified by flash column chromatography on silica gel (petroleum ether/ EtOAc = 10:1 to 5:1) to afford chiral products.

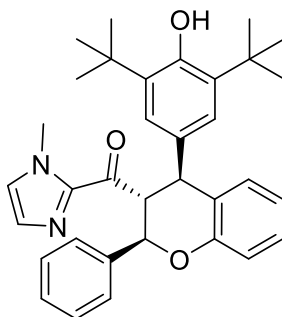

**3a**

((2*R*,3*R*,4*S*)-4-(3,5-di-*tert*-butyl-4-hydroxyphenyl)-2-phenylchroman-3-yl)(1-methyl-1*H*-imidazol-2-yl)methanone

Following **General Procedure**, a dried 25 mL Schlenk tube was charged with  $\alpha,\beta$ -unsaturated 2-acylimidazole **1a** (42.5 mg, 0.20 mmol), *para*-quinone methides (*p*-QMs) **2a** (74.5 mg, 0.24 mmol),  $K_2CO_3$  (33.2 mg, 0.24 mmol) and chiral catalyst  **$\Delta$ -Rh3** (5.0 mg, 3.0 mol%). The tube was purged with argon, then anhydrous toluene (0.6 mL) was added. The reaction mixture was stirred at 50°C for indicated time (monitored by TLC) under argon. After cooling to room temperature, the mixture was purified by flash column chromatography on silica gel (petroleum ether/ EtOAc = 10:1 to 5:1) to afford chiral product **3a** as pale yellow oil (101.4 mg, yield: 97%).

Enantiomeric excess was determined by HPLC analysis, *ee* = 93%, Chiralpak column IG,  $\lambda$  = 254 nm, *n*-hexane/*i*-PrOH = 95:5, flow rate: 1.0 mL/min, 30 °C,  $t_r$ (major) = 5.764 min,  $t_r$ (minor) = 6.517 min;

$[\alpha]_D^{25} = +127.1^\circ$  ( $c = 1.0$ ,  $CHCl_3$ );

IR (KBr)  $\nu_{max}$ : 3418, 2966, 1642, 1451, 1485, 1431, 1410  $cm^{-1}$ ;

$^1H$  NMR (400 MHz,  $CDCl_3$ ):  $\delta = 7.51 - 7.46$  (m, 2H), 7.24 – 7.08 (m, 4H), 6.96 – 6.90 (m, 3H), 6.84 – 6.77 (m, 3H), 6.61 (s, 1H), 5.43 (d,  $J = 9.9$  Hz, 1H), 4.97 (s, 2H), 4.61 (d,  $J = 11.4$  Hz, 1H), 3.54 (s, 3H), 1.31 (s, 18H);

$^{13}C$  NMR (101 MHz,  $CDCl_3$ ):  $\delta = 193.13, 154.67, 152.45, 143.76, 138.44, 135.45, 130.74, 129.41, 129.10, 128.40, 128.23, 127.85, 127.56, 126.41, 125.88, 120.45, 116.45, 81.02, 48.28, 35.62, 34.21, 30.35$ ;

HRMS (ESI,  $m/z$ ) calcd. for  $C_{34}H_{38}N_2O_3Na^+$   $[M+Na]^+$ : 545.2775, found: 545.2775.

In addition, when  **$\Lambda$ -Rh3** was used (3.0 mol %) instead of  **$\Delta$ -Rh3** under the optimal conditions, the reaction also proceeded smoothly to afford the desired product **3a'** (the enantiomer of **3a**) as pale yellow oil (99.6 mg, yield: 95%). Enantiomeric excess was determined by HPLC analysis, *ee* = 93%, Chiralpak column IG,  $\lambda$  = 254 nm, *n*-hexane/*i*-PrOH = 95:5, flow rate: 1.0 mL/min, 30 °C,  $t_r$ (minor) = 5.776 min,  $t_r$ (major) = 6.399 min.  $[\alpha]_D^{25} = -122.4^\circ$  ( $c = 1.0$ ,  $CHCl_3$ ).

In the scale-up synthesis, a dried 25 mL flask was charged with  $\alpha,\beta$ -unsaturated 2-acylimidazole **1a** (424.5 mg, 2.0 mmol), *para*-quinone methides (*p*-QMs) **2a** (745.1 mg, 2.4 mmol),  $K_2CO_3$  (331.7 mg, 2.4 mmol) and chiral catalyst  $\Delta$ -**Rh3** (49.8 mg, 3.0 mol%). The tube was purged with argon, then anhydrous toluene (6 mL) was added. The reaction mixture was stirred at 50°C for indicated time (monitored by TLC) under argon. After cooling to room temperature, the mixture was purified by flash column chromatography on silica gel (petroleum ether/ EtOAc = 10:1 to 5:1) to afford chiral product **3a** as pale yellow oil (993.3 mg, yield: 95%). Enantiomeric excess was determined by HPLC analysis, *ee* = 93%.

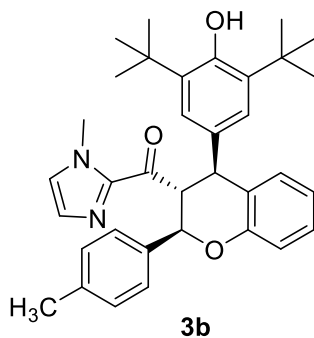

**3b**  
((2*R*,3*R*,4*S*)-4-(3,5-di-*tert*-butyl-4-hydroxyphenyl)-2-(*p*-tolyl)chroman-3-yl)(1-methyl-1*H*-imidazol-2-yl)methanone

Following **General Procedure**, a dried 25 mL Schlenk tube was charged with  $\alpha,\beta$ -unsaturated 2-acylimidazole **1b** (45.3 mg, 0.20 mmol), *para*-quinone methides (*p*-QMs) **2a** (74.5 mg, 0.24 mmol),  $K_2CO_3$  (33.2 mg, 0.24 mmol) and chiral catalyst  $\Delta$ -**Rh3** (5.0 mg, 3.0 mol%). The tube was purged with argon, then anhydrous toluene (0.6 mL) was added. The reaction mixture was stirred at 50°C for indicated time (monitored by TLC) under argon. After cooling to room temperature, the mixture was purified by flash column chromatography on silica gel (petroleum ether/ EtOAc = 10:1 to 5:1) to afford chiral product **3b** as pale yellow oil (104.2 mg, yield: 97%). Enantiomeric excess was determined by HPLC analysis, *ee* = 93%, Chiralpak column IG,  $\lambda$  = 254 nm, *n*-hexane/*i*-PrOH = 95:5, flow rate: 1.0 mL/min, 30 °C,  $t_r$ (major) = 5.309 min,  $t_r$ (minor) = 6.301 min;

$[\alpha]_D^{25} = +94.82^\circ$  ( $c = 1.0$ ,  $\text{CHCl}_3$ );

IR (KBr)  $\nu_{\text{max}}$ : 3626, 3450, 3145, 3102, 2958, 2885, 1662, 1614, 1580, 1518, 1483, 1447, 1407, 1364  $\text{cm}^{-1}$ ;

$^1\text{H}$  NMR (400 MHz,  $\text{CDCl}_3$ ):  $\delta = 7.43 - 7.36$  (m, 2H), 7.15 – 7.08 (m, 1H), 7.04 (d,  $J = 7.8$  Hz, 2H), 6.96 – 6.89 (m, 3H), 6.85 – 6.76 (m, 3H), 6.62 (s, 1H), 5.41 (d,  $J = 9.9$  Hz, 1H), 5.04 – 4.80 (m, 2H), 4.59 (d,  $J = 11.4$  Hz, 1H), 3.55 (s, 3H), 2.23 (s, 3H), 1.31 (s, 18H);

$^{13}\text{C}$  NMR (101 MHz,  $\text{CDCl}_3$ ):  $\delta = 193.31, 154.80, 152.42, 143.79, 138.09, 135.47, 135.42, 130.78, 129.36, 129.10, 128.97, 127.87, 127.53, 126.40, 126.31, 125.88, 120.33, 116.45, 80.81, 48.59, 35.63, 34.20, 30.34, 21.22$ ;

HRMS (ESI,  $m/z$ ) calcd. for  $\text{C}_{35}\text{H}_{40}\text{N}_2\text{O}_3\text{Na}^+$   $[\text{M}+\text{Na}]^+$ : 559.2931, found: 559.2932.

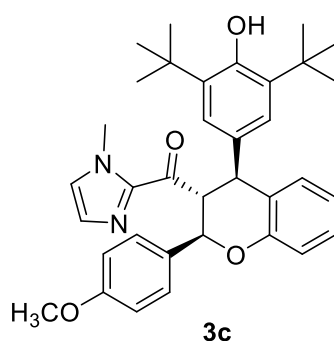

((2*R*,3*R*,4*S*)-4-(3,5-di-*tert*-butyl-4-hydroxyphenyl)-2-(4-methoxyphenyl)chroman-3-yl)(1-methyl-1*H*-imidazol-2-yl)methanone

A dried 25 mL Schlenk tube was charged with  $\alpha,\beta$ -unsaturated 2-acylimidazole **1c** (48.5 mg, 0.20 mmol), *para*-quinone methides (*p*-QMs) **2a** (74.5 mg, 0.24 mmol),  $\text{K}_2\text{CO}_3$  (33.2 mg, 0.24 mmol) and chiral catalyst  $\Delta$ -**Rh3** (5.0 mg, 3.0 mol%). The tube was purged with argon, then anhydrous toluene (0.6 mL) was added. The reaction mixture was stirred at 50°C for indicated time (monitored by TLC) under argon. After cooling to room temperature, the mixture was purified by flash column chromatography on silica gel (petroleum ether/ EtOAc = 10:1 to 5:1) to afford chiral product **3c** as pale yellow oil (98.0 mg, yield: 89%).

Enantiomeric excess was determined by HPLC analysis,  $ee = 97\%$ , Chiralpak column AD-H,  $\lambda = 254$  nm,  $n$ -hexane/ $i$ -PrOH = 90:10, flow rate: 1.0 mL/min, 30 °C,  $t_r$ (major) = 6.459 min,  $t_r$ (minor) = 8.318 min;

$[\alpha]_D^{25} = +115.6^\circ$  ( $c = 1.0$ ,  $\text{CHCl}_3$ );

IR (KBr)  $\nu_{\text{max}}$ : 3641, 2989, 2813, 1698, 1666, 1605, 1534, 1497, 1441, 1408, 1374  $\text{cm}^{-1}$ ;

$^1\text{H}$  NMR (400 MHz,  $\text{CDCl}_3$ ):  $\delta = 7.44$  (d,  $J = 8.6$  Hz, 2H), 7.17 – 7.08 (m, 1H), 6.97 – 6.89 (m, 3H), 6.87 – 6.73 (m, 5H), 6.66 (s, 1H), 5.39 (d,  $J = 10.2$  Hz, 1H), 5.05 – 4.85 (m, 2H), 4.58 (d,  $J = 11.4$  Hz, 1H), 3.72 (s, 3H), 3.58 (s, 3H), 1.31 (s, 18H);

$^{13}\text{C}$  NMR (101 MHz,  $\text{CDCl}_3$ ):  $\delta = 193.34, 159.53, 154.78, 152.40, 143.78, 135.40, 130.77, 130.66, 129.37, 129.24, 129.10, 127.51, 126.39, 126.36, 125.85, 120.33, 116.43, 113.64, 80.54, 55.20, 48.54, 35.65, 34.18, 30.31$ ;

HRMS (ESI,  $m/z$ ) calcd. for  $\text{C}_{35}\text{H}_{40}\text{N}_2\text{O}_4\text{Na}^+$   $[\text{M}+\text{Na}]^+$ : 575.2880, found: 575.2877.

In addition, when **A-Rh3** was used (3.0 mol %) instead of **A-Rh3** under the optimal conditions, the reaction also proceeded smoothly to afford the desired product **3c'** (the enantiomer of **3c**) as pale yellow oil (102.0 mg, yield: 92%). Enantiomeric excess was determined by HPLC analysis,  $ee = 98\%$ , Chiralpak column AD-H,  $\lambda = 254$  nm,  $n$ -hexane/ $i$ -PrOH = 90:10, flow rate: 1.0 mL/min, 30 °C,  $t_r$ (minor) = 6.660 min,  $t_r$ (major) = 8.343 min.  $[\alpha]_D^{25} = -103.2^\circ$  ( $c = 1.0$ ,  $\text{CHCl}_3$ ).

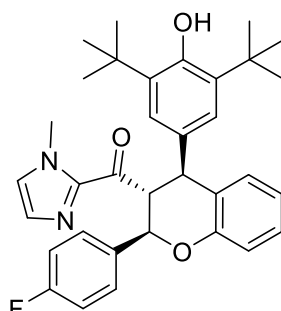

**3d**

((2*R*,3*R*,4*S*)-4-(3,5-di-*tert*-butyl-4-hydroxyphenyl)-2-(4-fluorophenyl)chroman-3-yl)(1-methyl-1*H*-imidazol-2-yl)methanone

A dried 25 mL Schlenk tube was charged with  $\alpha,\beta$ -unsaturated 2-acylimidazole **1d** (46.1 mg, 0.20 mmol), *para*-quinone methides (*p*-QMs) **2a** (74.5 mg, 0.24 mmol),  $K_2CO_3$  (33.2 mg, 0.24 mmol) and chiral catalyst  $\Delta$ -**Rh3** (5.0 mg, 3.0 mol%). The tube was purged with argon, then anhydrous toluene (0.6 mL) was added. The reaction mixture was stirred at 50°C for indicated time (monitored by TLC) under argon. After cooling to room temperature, the mixture was purified by flash column chromatography on silica gel (petroleum ether/ EtOAc = 10:1 to 5:1) to afford chiral product **3d** as pale yellow oil (102.0 mg, yield: 94%).

Enantiomeric excess was determined by HPLC analysis, *ee* = 93%, Chiralpak column AD-H,  $\lambda$  = 254 nm, *n*-hexane/*i*-PrOH = 90:10, flow rate: 1.0 mL/min, 30 °C,  $t_r$ (major) = 4.548 min,  $t_r$ (minor) = 6.735 min;

$[\alpha]_D^{25} = +299.2^\circ$  ( $c = 1.0$ ,  $CHCl_3$ );

IR (KBr)  $\nu_{max}$ : 3630, 3579, 2964, 1653, 1611, 1584, 1447, 1260  $cm^{-1}$ ;

$^1H$  NMR (400 MHz,  $CDCl_3$ ):  $\delta = 7.52 - 7.45$  (m, 2H), 7.17 – 7.10 (m, 1H), 6.96 – 6.88 (m, 5H), 6.85 – 6.80 (m, 3H), 6.67 (s, 1H), 5.42 (d,  $J = 10.1$  Hz, 1H), 5.03 – 4.81 (m, 2H), 4.59 (d,  $J = 11.4$  Hz, 1H), 3.59 (s, 3H), 1.31 (s, 18H);

$^{13}C$  NMR (101 MHz,  $CDCl_3$ ):  $\delta = 193.03$ , 162.6 (d,  $J = 246.3$  Hz, 1C), 154.52, 152.47, 143.67, 135.47, 134.39, 134.35, 130.59, 129.67 (d,  $J = 8.4$  Hz, 1C), 129.42, 129.20, 127.60, 126.44 (d,  $J = 23.4$  Hz, 2C), 125.83, 120.55, 116.40, 115.12 (d,  $J = 21.3$  Hz, 2C), 80.23, 48.27, 35.65, 34.19, 30.31;

$^{19}F$  NMR (376 MHz,  $CDCl_3$ )  $\delta = -113.60$ ;

HRMS (ESI,  $m/z$ ) calcd. for  $C_{34}H_{37}FN_2O_3Na^+$   $[M+Na]^+$ : 563.2680, found: 563.2679.

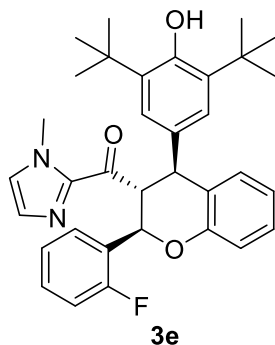

((2*R*,3*R*,4*S*)-4-(3,5-di-*tert*-butyl-4-hydroxyphenyl)-2-(2-fluorophenyl)chroman-3-yl)(1-methyl-1*H*-imidazol-2-yl)methanone

A dried 25 mL Schlenk tube was charged with  $\alpha,\beta$ -unsaturated 2-acylimidazole **1e** (46.1 mg, 0.20 mmol), *para*-quinone methides (*p*-QMs) **2a** (74.5 mg, 0.24 mmol),  $K_2CO_3$  (33.2 mg, 0.24 mmol) and chiral catalyst  **$\Delta$ -Rh3** (5.0 mg, 3.0 mol%). The tube was purged with argon, then anhydrous toluene (0.6 mL) was added. The reaction mixture was stirred at 50°C for indicated time (monitored by TLC) under argon. After cooling to room temperature, the mixture was purified by flash column chromatography on silica gel (petroleum ether/ EtOAc = 10:1 to 5:1) to afford chiral product **3e** as pale yellow oil (95.2 mg, yield: 88%).

Enantiomeric excess was determined by HPLC analysis, *ee* = 99%, Chiralpak column IC,  $\lambda$  = 254 nm, *n*-hexane/*i*-PrOH = 98:2, flow rate: 1.0 mL/min, 30 °C,  $t_r$ (major) = 5.182 min,  $t_r$ (minor) = 8.206 min;

$[\alpha]_D^{25} = +225.3^\circ$  ( $c = 1.0$ ,  $CHCl_3$ );

IR (KBr)  $\nu_{max}$ : 3625, 3458, 2962, 2920, 2864, 1661, 1617, 1582, 1488, 1452, 1433, 1410  $cm^{-1}$ ;

$^1H$  NMR (400 MHz,  $CDCl_3$ ):  $\delta$  = 7.72 (td,  $J = 7.5, 1.8$  Hz, 1H), 7.20 – 7.10 (m, 2H), 7.06 (td,  $J = 7.5, 1.2$  Hz, 1H), 6.97 – 6.90 (m, 4H), 6.84 – 6.78 (m, 3H), 6.65 (s, 1H), 5.79 (d,  $J = 10.2$  Hz, 1H), 5.05 (t,  $J = 10.8$  Hz, 1H), 4.97 (s, 1H), 4.62 (d,  $J = 11.4$  Hz, 1H), 3.59 (s, 3H), 1.31 (s, 18H);

$^{13}C$  NMR (101 MHz,  $CDCl_3$ ):  $\delta$  = 192.50, 160.22 (d,  $J = 248.8$  Hz, 1C), 154.55, 152.46, 143.68, 135.45, 130.63, 130.05 (d,  $J = 8.3$  Hz, 1C), 129.66, 129.62 (d,  $J = 3.4$  Hz, 1C), 129.42, 129.18, 127.57, 126.46, 126.33, 125.89, 125.60 (d,  $J = 13.0$  Hz, 1C),



124.24 (d,  $J = 3.6$  Hz, 1C), 120.55, 116.40, 115.20 (d,  $J = 22.1$  Hz, 1C), 73.72 (d,  $J = 3.4$  Hz, 1C), 48.28, 35.62, 34.19, 30.32;

$^{19}\text{F}$  NMR (376 MHz,  $\text{CDCl}_3$ ):  $\delta = -117.62$ ;

HRMS (ESI,  $m/z$ ) calcd. for  $\text{C}_{34}\text{H}_{37}\text{FN}_2\text{O}_3\text{Na}^+$   $[\text{M}+\text{Na}]^+$ : 563.2680, found: 563.2682.

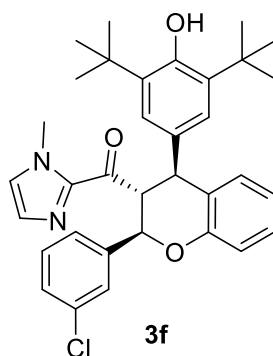

((2*R*,3*R*,4*S*)-2-(3-chlorophenyl)-4-(3,5-di-*tert*-butyl-4-hydroxyphenyl)chroman-3-yl)(1-methyl-1*H*-imidazol-2-yl)methanone

A dried 25 mL Schlenk tube was charged with  $\alpha,\beta$ -unsaturated 2-acylimidazole **1f** (49.4 mg, 0.20 mmol), *para*-quinone methides (*p*-QMs) **2a** (74.5 mg, 0.24 mmol),  $\text{K}_2\text{CO}_3$  (33.2 mg, 0.24 mmol) and chiral catalyst  $\Delta$ -**Rh3** (5.0 mg, 3.0 mol%). The tube was purged with argon, then anhydrous toluene (0.6 mL) was added. The reaction mixture was stirred at 50°C for indicated time (monitored by TLC) under argon. After cooling to room temperature, the mixture was purified by flash column chromatography on silica gel (petroleum ether/ EtOAc = 10:1 to 5:1) to afford chiral product **3f** as pale yellow oil (107.0 mg, yield: 96%).

Enantiomeric excess was determined by HPLC analysis,  $ee = 96\%$ , Chiralpak column AD-H,  $\lambda = 254$  nm, *n*-hexane/*i*-PrOH = 90:10, flow rate: 1.0 mL/min, 30 °C,  $t_r(\text{major}) = 4.945$  min,  $t_r(\text{minor}) = 5.735$  min;

$[\alpha]_D^{25} = +80.2^\circ$  ( $c = 1.0$ ,  $\text{CHCl}_3$ );

IR (KBr)  $\nu_{\text{max}}$ : 3444, 2959, 1663, 1581, 1483.47, 1444, 1408, 1363  $\text{cm}^{-1}$ ;

$^1\text{H}$  NMR (400 MHz,  $\text{CDCl}_3$ ):  $\delta = 7.48 - 7.45$  (m, 1H), 7.39 (dt,  $J = 6.9, 1.9$  Hz, 1H), 7.19 - 7.11 (m, 3H), 6.97 - 6.89 (m, 3H), 6.84 - 6.80 (m, 3H), 6.67 (s, 1H), 5.41 (d,  $J$

= 9.9 Hz, 1H), 5.02 – 4.83 (m, 2H), 4.61 (d,  $J = 11.4$  Hz, 1H), 3.60 (s, 3H), 1.31 (s, 18H);

$^{13}\text{C}$  NMR (101 MHz,  $\text{CDCl}_3$ ):  $\delta = 192.69, 154.33, 152.50, 143.65, 140.54, 135.49, 133.95, 130.58, 129.54, 129.45, 129.26, 128.49, 128.01, 127.65, 126.63, 126.26, 125.90, 125.85, 120.66, 116.41, 80.20, 47.92, 35.66, 34.21, 30.33$ ;

HRMS (ESI,  $m/z$ ) calcd. for  $\text{C}_{34}\text{H}_{37}\text{ClN}_2\text{O}_3\text{Na}^+$  [ $\text{M}+\text{Na}$ ] $^+$ : 579.2385, found: 579.2390.

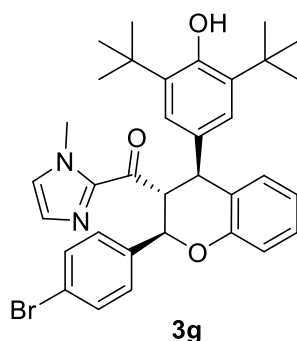

**3g**  
((2*R*,3*R*,4*S*)-2-(4-bromophenyl)-4-(3,5-di-*tert*-butyl-4-hydroxyphenyl)chroman-3-yl)(1-methyl-1*H*-imidazol-2-yl)methanone

A dried 25 mL Schlenk tube was charged with  $\alpha,\beta$ -unsaturated 2-acylimidazole **1g** (58.2 mg, 0.20 mmol), *para*-quinone methides (*p*-QMs) **2a** (74.5 mg, 0.24 mmol),  $\text{K}_2\text{CO}_3$  (33.2 mg, 0.24 mmol) and chiral catalyst  $\Delta$ -**Rh3** (5.0 mg, 3.0 mol%). The tube was purged with argon, then anhydrous toluene (0.6 mL) was added. The reaction mixture was stirred at 50°C for indicated time (monitored by TLC) under argon. After cooling to room temperature, the mixture was purified by flash column chromatography on silica gel (petroleum ether/ EtOAc = 10:1 to 5:1) to afford chiral product **3g** as pale yellow oil (115.0 mg, yield: 96%).

Enantiomeric excess was determined by HPLC analysis,  $ee = 97\%$ , Chiralpak column AD-H,  $\lambda = 254$  nm, *n*-hexane/*i*-PrOH = 95:5, flow rate: 1.0 mL/min, 30 °C,  $t_r(\text{major}) = 7.082$  min,  $t_r(\text{minor}) = 9.389$  min;

$[\alpha]_D^{25} = +67.3^\circ$  ( $c = 1.0, \text{CHCl}_3$ );

IR (KBr)  $\nu_{\text{max}}$ : 3518, 2832, 1677, 1596, 1487, 1402, 1289  $\text{cm}^{-1}$

$^1\text{H}$  NMR (400 MHz,  $\text{CDCl}_3$ ):  $\delta = 7.64 - 7.58$  (m, 2H),  $7.56 - 7.51$  (m, 2H),  $7.19 - 7.13$  (m, 1H),  $6.97 - 6.93$  (m, 1H),  $6.88$  (s, 2H),  $6.85 - 6.79$  (m, 3H),  $6.70$  (s, 1H),  $5.49$  (d,  $J = 9.9$  Hz, 1H),  $5.01 - 4.80$  (m, 2H),  $4.59$  (d,  $J = 11.3$  Hz, 1H),  $3.61$  (s, 3H),  $1.30$  (s, 18H);

$^{13}\text{C}$  NMR (101 MHz,  $\text{CDCl}_3$ ):  $\delta = 192.91, 154.44, 152.47, 143.61, 137.59, 135.47, 131.39, 130.50, 129.63, 129.40, 129.26, 127.63, 126.61, 126.26, 125.81, 122.38, 120.59, 116.39, 80.18, 48.35, 35.69, 34.18, 30.31$ ;

HRMS (ESI,  $m/z$ ) calcd. for  $\text{C}_{34}\text{H}_{37}\text{BrN}_2\text{O}_3\text{Na}^+$   $[\text{M}+\text{Na}]^+$ : 623.1880, found: 623.1884.

In addition, when **A-Rh3** was used (3.0 mol %) instead of **A-Rh3** under the optimal conditions, the reaction also proceeded smoothly to afford the desired product **3g'** (the enantiomer of **3g**) as pale yellow oil (112.0 mg, yield: 93%). Enantiomeric excess was determined by HPLC analysis,  $ee = 98\%$ , Chiralpak column AD-H,  $\lambda = 254$  nm,  $n$ -hexane/ $i$ -PrOH = 95:5, flow rate: 1.0 mL/min,  $25$  °C,  $t_r(\text{minor}) = 6.100$  min,  $t_r(\text{major}) = 7.980$  min.  $[\alpha]_{\text{D}}^{25} = -66.9^\circ$  ( $c = 1.0, \text{CHCl}_3$ ).

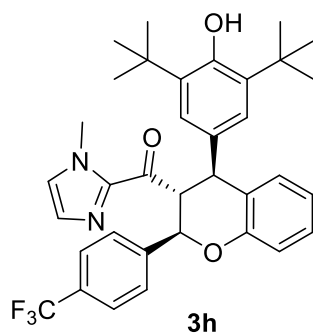

((2R,3R,4S)-4-(3,5-di-*tert*-butyl-4-hydroxyphenyl)-2-(4-(trifluoromethyl)phenyl)chroman-3-yl)(1-methyl-1H-imidazol-2-yl)methanone

A dried 25 mL Schlenk tube was charged with  $\alpha,\beta$ -unsaturated 2-acylimidazole **1h** (56.1 mg, 0.20 mmol), *para*-quinone methides (*p*-QMs) **2a** (74.5 mg, 0.24 mmol),  $\text{K}_2\text{CO}_3$  (33.2 mg, 0.24 mmol) and chiral catalyst **A-Rh3** (5.0 mg, 3.0 mol%). The tube was purged with argon, then anhydrous toluene (0.6 mL) was added. The reaction mixture was stirred at  $50^\circ\text{C}$  for indicated time (monitored by TLC) under argon. After cooling to room temperature, the mixture was purified by flash column

chromatography on silica gel (petroleum ether/ EtOAc = 10:1 to 5:1) to afford chiral product **3h** as pale yellow oil (114.2 mg, yield: 97%).

Enantiomeric excess was determined by HPLC analysis, *ee* > 99%, Chiralpak column AD-H,  $\lambda$  = 254 nm, *n*-hexane/*i*-PrOH = 95:5, flow rate: 1.0 mL/min, 30 °C,  $t_r$ (major) = 4.744 min,  $t_r$ (minor) = 6.311 min;

$[\alpha]_D^{25} = +197.8^\circ$  ( $c = 1.0$ , CHCl<sub>3</sub>);

IR (KBr)  $\nu_{\max}$ : 3643, 3452, 3147, 2956, 1663, 1623, 1581, 1484, 1452, 1435, 1408, 1361, 1326 cm<sup>-1</sup>;

<sup>1</sup>H NMR (400 MHz, CDCl<sub>3</sub>):  $\delta$  = 7.56 (dd,  $J = 50.9, 8.1$  Hz, 4H), 7.17 – 7.11 (m, 1H), 6.95 (d,  $J = 7.7$  Hz, 1H), 6.90 (s, 2H), 6.85 – 6.79 (m, 3H), 6.66 (s, 1H), 5.51 (d,  $J = 10.0$  Hz, 1H), 5.03 – 4.85 (m, 2H), 4.60 (d,  $J = 11.3$  Hz, 1H), 3.58 (s, 3H), 1.31 (s, 18H);

<sup>13</sup>C NMR (101 MHz, CDCl<sub>3</sub>):  $\delta$  = 192.72, 154.31, 152.54, 143.58, 142.54, 135.54, 130.44, 130.37 (q,  $J = 32.4$  Hz, 1C), 129.44, 129.30, 128.20, 127.71, 126.67, 126.24, 125.82, 125.20 (q,  $J = 3.8$  Hz, 2C), 124.03 (d,  $J = 272.2$  Hz, 1C), 120.74, 116.40, 80.16, 48.21, 35.65, 34.20, 30.31;

<sup>19</sup>F NMR (376 MHz, CDCl<sub>3</sub>):  $\delta$  = -62.61;

HRMS (ESI, *m/z*) calcd. for C<sub>35</sub>H<sub>37</sub>F<sub>3</sub>N<sub>2</sub>O<sub>3</sub>Na<sup>+</sup> [M+Na]<sup>+</sup>: 613.2637, found: 613.2650.

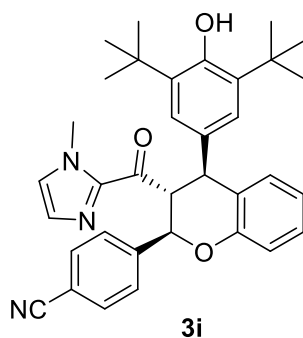

4-((2*R*,3*R*,4*S*)-4-(3,5-di-*tert*-butyl-4-hydroxyphenyl)-3-(1-methyl-1*H*-imidazole-2-carbonyl)chroman-2-yl)benzonitrile

A dried 25 mL Schlenk tube was charged with  $\alpha,\beta$ -unsaturated 2-acylimidazole **1i** (47.5 mg, 0.20 mmol), *para*-quinone methides (*p*-QMs) **2a** (74.5 mg, 0.24 mmol),

K<sub>2</sub>CO<sub>3</sub> (33.2 mg, 0.24 mmol) and chiral catalyst **Δ-Rh3** (5.0 mg, 3.0 mol%). The tube was purged with argon, then anhydrous toluene (0.6 mL) was added. The reaction mixture was stirred at 50°C for indicated time (monitored by TLC) under argon. After cooling to room temperature, the mixture was purified by flash column chromatography on silica gel (petroleum ether/ EtOAc = 10:1 to 4:1) to afford chiral product **3i** as white solid (103.0 mg, yield: 94%).

Enantiomeric excess was determined by HPLC analysis, *ee* = 85%, Chiralpak column IG, λ = 254 nm, *n*-hexane/*i*-PrOH = 90:10, flow rate: 1.0 mL/min, 30 °C, *t<sub>r</sub>*(major) = 10.950 min, *t<sub>r</sub>*(minor) = 14.342 min;

[α]<sub>D</sub><sup>25</sup> = +253.3° (*c* = 1.0, CHCl<sub>3</sub>);

IR (KBr) ν<sub>max</sub>: 3616, 3445, 3148, 3102, 2961, 2913, 2869, 2230, 1662, 1617, 1579, 1511, 1482, 1454, 1433, 1408, 1369, 1333 cm<sup>-1</sup>;

<sup>1</sup>H NMR (400 MHz, CDCl<sub>3</sub>): δ = 7.57 (ddd, 4H), 7.19 – 7.14 (m, 1H), 6.95 (d, *J* = 8.8 Hz, 1H), 6.90 – 6.86 (m, 2H), 6.86 – 6.80 (m, 3H), 6.71 (s, 1H), 5.49 (d, *J* = 10.0 Hz, 1H), 5.00 – 4.80 (m, 2H), 4.58 (d, *J* = 11.3 Hz, 1H), 3.61 (s, 3H), 1.30 (s, 18H);

<sup>13</sup>C NMR (101 MHz, CDCl<sub>3</sub>): δ = 192.49, 154.06, 152.55, 143.87, 143.46, 135.53, 132.08, 130.23, 129.44, 129.38, 128.46, 127.76, 126.85, 126.12, 125.77, 120.88, 118.75, 116.36, 112.04, 79.95, 47.98, 35.72, 34.18, 30.28;

HRMS (ESI, *m/z*) calcd. for C<sub>35</sub>H<sub>37</sub>N<sub>3</sub>O<sub>3</sub>Na<sup>+</sup> [M+Na]<sup>+</sup>: 570.2727, found: 570.2727.

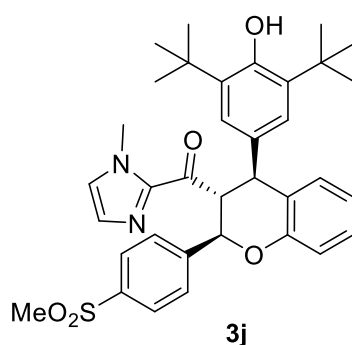

**3j**  
((2*R*,3*R*,4*S*)-4-(3,5-di-*tert*-butyl-4-hydroxyphenyl)-2-(*p*-tolyl)chroman-3-yl)(1-methyl-1*H*-imidazol-2-yl)methanone

A dried 25 mL Schlenk tube was charged with  $\alpha,\beta$ -unsaturated 2-acylimidazole **1j** (58.1 mg, 0.20 mmol), *para*-quinone methides (*p*-QMs) **2a** (74.5 mg, 0.24 mmol),  $K_2CO_3$  (33.2 mg, 0.24 mmol) and chiral catalyst  $\Delta$ -**Rh3** (5.0 mg, 3.0 mol%). The tube was purged with argon, then anhydrous toluene (0.6 mL) was added. The reaction mixture was stirred at 50°C for indicated time (monitored by TLC) under argon. After cooling to room temperature, the mixture was purified by flash column chromatography on silica gel (petroleum ether/ EtOAc = 5:1 to 2:1) to afford chiral product **3j** as colorless oil (97.1 mg, yield: 81%).

Enantiomeric excess was determined by HPLC analysis, *ee* = 91%, Chiralpak column AD-H,  $\lambda$  = 220 nm, *n*-hexane/*i*-PrOH = 80:20, flow rate: 1.0 mL/min, 30 °C,  $t_r$ (major) = 14.629 min,  $t_r$ (minor) = 28.338 min;

$[\alpha]_D^{25} = +241.8^\circ$  ( $c = 1.0$ ,  $CHCl_3$ );

IR (KBr)  $\nu_{max}$ : 3582, 3452, 3148, 3105, 2956, 1925, 1662, 1609, 1580, 1484, 1438, 1403, 1364  $cm^{-1}$ ;

$^1H$  NMR (400 MHz,  $CDCl_3$ ):  $\delta = 7.85 - 7.70$  (m, 4H), 7.18 – 7.12 (m, 1H), 6.96 – 6.92 (m, 1H), 6.89 (s, 2H), 6.86 – 6.82 (m, 2H), 6.80 (s, 1H), 6.69 (s, 1H), 5.54 (d,  $J = 10.0$  Hz, 1H), 5.00 (s, 1H), 4.91 (s, 1H), 4.60 (d,  $J = 11.4$  Hz, 1H), 3.61 (s, 3H), 2.96 (s, 3H), 1.30 (s, 18H);

$^{13}C$  NMR (101 MHz,  $CDCl_3$ ):  $\delta = 192.42, 154.11, 152.56, 144.81, 143.46, 140.14, 135.58, 130.24, 129.46, 129.39, 128.83, 127.75, 127.37, 126.89, 126.18, 125.78, 120.88, 116.34, 79.95, 48.16, 44.46, 35.72, 34.19, 30.30$ ;

HRMS (ESI,  $m/z$ ) calcd. for  $C_{35}H_{40}N_2O_5SNa^+$   $[M+Na]^+$ : 623.2550, found: 623.2551.

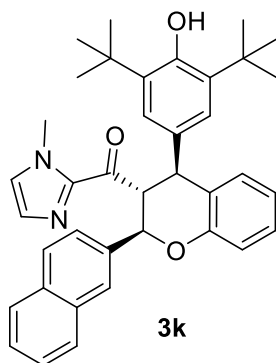

((2*R*,3*R*,4*S*)-4-(3,5-di-*tert*-butyl-4-hydroxyphenyl)-2-(naphthalen-2-yl)chroman-3-yl)(1-methyl-1*H*-imidazol-2-yl)methanone

A dried 25 mL Schlenk tube was charged with  $\alpha,\beta$ -unsaturated 2-acylimidazole **1k** (52.5 mg, 0.20 mmol), *para*-quinone methides (*p*-QMs) **2a** (74.5 mg, 0.24 mmol),  $K_2CO_3$  (33.2 mg, 0.24 mmol) and chiral catalyst  $\Delta$ -**Rh3** (5.0 mg, 3.0 mol%). The tube was purged with argon, then anhydrous toluene (0.6 mL) was added. The reaction mixture was stirred at 50°C for indicated time (monitored by TLC) under argon. After cooling to room temperature, the mixture was purified by flash column chromatography on silica gel (petroleum ether/ EtOAc = 10:1 to 5:1) to afford chiral product **3k** as pale yellow solid (111.2 mg, yield: 97%).

Enantiomeric excess was determined by HPLC analysis, *ee* = 96%, Chiralpak column IG,  $\lambda$  = 254 nm, *n*-hexane/*i*-PrOH = 95:5, flow rate: 1.0 mL/min, 30 °C,  $t_r$ (major) = 7.116 min,  $t_r$ (minor) = 9.573 min;

$[\alpha]_D^{25} = +142.2^\circ$  ( $c = 1.0$ ,  $CHCl_3$ );

IR (KBr)  $\nu_{max}$ : 3673, 3190, 3102, 2960, 2873, 1649, 1624, 1575, 1503, 1483, 1447 1421, 1307  $cm^{-1}$ ;

$^1H$  NMR (400 MHz,  $CDCl_3$ ):  $\delta$  = 7.91 (s, 1H), 7.80 – 7.67 (m, 4H), 7.42 – 7.36 (m, 2H), 7.15 (ddd,  $J = 8.5, 7.1, 2.1$  Hz, 1H), 7.00 – 6.91 (m, 3H), 6.88 – 6.79 (m, 2H), 6.76 (s, 1H), 6.51 (s, 1H), 5.62 (d,  $J = 10.0$  Hz, 1H), 5.17 – 4.93 (m, 2H), 4.66 (d,  $J = 11.4$  Hz, 1H), 3.47 (s, 3H), 1.31 (s, 18H);

$^{13}C$  NMR (101 MHz,  $CDCl_3$ ):  $\delta$  = 193.02, 154.66, 152.40, 143.61, 135.83, 135.39, 133.33, 132.92, 130.67, 129.39, 129.03, 128.16, 128.12, 127.56, 127.53, 127.39,

126.36, 125.99, 125.85, 125.82, 125.41, 120.43, 116.42, 81.11, 48.43, 35.49, 34.15, 30.28;

HRMS (ESI,  $m/z$ ) calcd. for  $C_{38}H_{40}N_2O_3Na^+$  [ $M+Na$ ] $^+$ : 595.2931, found: 595.2934.

In addition, when  **$\Lambda$ -Rh3** was used (3.0 mol %) instead of  **$\Delta$ -Rh3** under the optimal conditions, the reaction also proceeded smoothly to afford the desired product **3k'** (the enantiomer of **3k**) as pale yellow solid (105.2 mg, yield: 92%). Enantiomeric excess was determined by HPLC analysis,  $ee = 90\%$ , Chiralpak column IG,  $\lambda = 254$  nm,  $n$ -hexane/ $i$ -PrOH = 95:5, flow rate: 1.0 mL/min, 30 °C,  $t_r(\text{minor}) = 6.805$  min,  $t_r(\text{major}) = 9.573$  min.  $[\alpha]_D^{25} = -157.2^\circ$  ( $c = 1.0$ ,  $CHCl_3$ ).

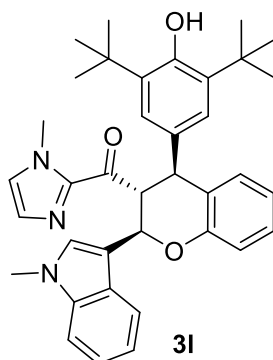

((2*R*,3*R*,4*S*)-4-(3,5-di-*tert*-butyl-4-hydroxyphenyl)-2-(1-methyl-1*H*-indol-3-yl)chroman-3-yl)(1-methyl-1*H*-imidazol-2-yl)methanone

A dried 25 mL Schlenk tube was charged with  $\alpha,\beta$ -unsaturated 2-acylimidazole **11** (53.1 mg, 0.20 mmol), *para*-quinone methides (*p*-QMs) **2a** (74.5 mg, 0.24 mmol),  $K_2CO_3$  (33.2 mg, 0.24 mmol) and chiral catalyst  **$\Lambda$ -Rh3** (5.0 mg, 3.0 mol%). The tube was purged with argon, then anhydrous toluene (0.6 mL) was added. The reaction mixture was stirred at 50°C for indicated time (monitored by TLC) under argon. After cooling to room temperature, the mixture was purified by flash column chromatography on silica gel (petroleum ether/ EtOAc = 10:1 to 4:1) to afford chiral product **31** as pale yellow oil (94.5 mg, yield: 82%).

Enantiomeric excess was determined by HPLC analysis,  $ee = 93\%$ , Chiralpak column IB,  $\lambda = 254$  nm,  $n$ -hexane/ $i$ -PrOH = 90:10, flow rate: 1.0 mL/min, 30 °C,  $t_r(\text{minor}) = 6.715$  min,  $t_r(\text{major}) = 7.221$  min;



$[\alpha]_D^{25} = +274.8^\circ$  ( $c = 1.0$ ,  $\text{CHCl}_3$ );

IR (KBr)  $\nu_{\text{max}}$ : 3610, 3393, 2913, 1662, 1512, 1505, 1479, 1439, 1407, 1303  $\text{cm}^{-1}$ ;

$^1\text{H}$  NMR (400 MHz,  $\text{CDCl}_3$ ):  $\delta = 7.74$  (dd,  $J = 7.7, 1.3$  Hz, 1H), 7.43 (s, 1H), 7.18 – 7.08 (m, 4H), 6.97 – 6.89 (m, 3H), 6.88 – 6.76 (m, 3H), 6.60 (s, 1H), 5.87 (d,  $J = 10.5$  Hz, 1H), 5.11 (s, 1H), 4.96 (s, 1H), 4.66 (d,  $J = 11.2$  Hz, 1H), 3.61 (s, 3H), 3.45 (s, 3H), 1.32 (s, 18H);

$^{13}\text{C}$  NMR (101 MHz,  $\text{CDCl}_3$ ):  $\delta = 193.35, 154.95, 152.39, 143.84, 136.67, 135.43, 131.06, 129.39, 128.90, 128.69, 127.46, 127.13, 126.42, 126.24, 125.90, 121.73, 120.21, 119.49, 116.54, 112.57, 109.10, 73.25, 48.95, 35.57, 34.21, 32.81, 30.35$ ;

HRMS (ESI,  $m/z$ ) calcd. for  $\text{C}_{37}\text{H}_{41}\text{N}_3\text{O}_3\text{Na}^+$   $[\text{M}+\text{Na}]^+$ : 598.3040, found: 598.3037.

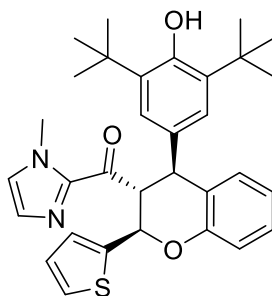

**3m**

((2*R*,3*R*,4*S*)-4-(3,5-di-*tert*-butyl-4-hydroxyphenyl)-2-(thiophen-2-yl)chroman-3-yl)(1-methyl-1*H*-imidazol-2-yl)methanone

A dried 25 mL Schlenk tube was charged with  $\alpha,\beta$ -unsaturated 2-acylimidazole **1m** (43.7 mg, 0.20 mmol), *para*-quinone methides (*p*-QMs) **2a** (74.5 mg, 0.24 mmol),  $\text{K}_2\text{CO}_3$  (33.2 mg, 0.24 mmol) and chiral catalyst  **$\Delta$ -Rh3** (5.0 mg, 3.0 mol%). The tube was purged with argon, then anhydrous toluene (0.6 mL) was added. The reaction mixture was stirred at 50°C for indicated time (monitored by TLC) under argon. After cooling to room temperature, the mixture was purified by flash column chromatography on silica gel (petroleum ether/ EtOAc = 10:1 to 5:1) to afford chiral product **3m** as pale yellow oil (82.2 mg, yield: 78%).

Enantiomeric excess was determined by HPLC analysis,  $ee = 91\%$ , Chiralpak column IG,  $\lambda = 254$  nm, *n*-hexane/*i*-PrOH = 95:5, flow rate: 1.0 mL/min, 30 °C,  $t_r(\text{major}) = 6.505$  min,  $t_r(\text{minor}) = 6.989$  min;

$[\alpha]_D^{25} = +164.8^\circ$  ( $c = 1.0$ ,  $\text{CHCl}_3$ );

IR (KBr)  $\nu_{\text{max}}$ : 3671, 2923, 1667, 1596, 1504, 1478, 1447, 1410, 1355  $\text{cm}^{-1}$ ;

$^1\text{H}$  NMR (400 MHz,  $\text{CDCl}_3$ ):  $\delta = 7.18$  (dd,  $J = 5.1, 1.2$  Hz, 1H), 7.16 – 7.09 (m, 2H), 6.97 – 6.93 (m, 1H), 6.91 – 6.86 (m, 3H), 6.84 – 6.78 (m, 3H), 6.70 (s, 1H), 5.77 (d,  $J = 10.2$  Hz, 1H), 5.02 – 4.83 (m, 2H), 4.57 (d,  $J = 11.4$  Hz, 1H), 3.62 (s, 3H), 1.31 (s, 18H);

$^{13}\text{C}$  NMR (101 MHz,  $\text{CDCl}_3$ ):  $\delta = 192.83, 154.27, 152.49, 143.68, 141.47, 135.47, 130.44, 129.30, 127.63, 126.52, 126.44, 126.35, 126.17, 125.87, 125.81, 120.63, 116.48, 75.99, 48.51, 35.73, 34.20, 30.32$ ;

HRMS (ESI,  $m/z$ ) calcd. for  $\text{C}_{32}\text{H}_{36}\text{N}_2\text{O}_3\text{SNa}^+$   $[\text{M}+\text{Na}]^+$ : 551.2339, found: 551.2339.

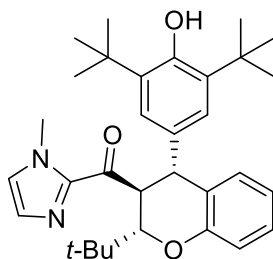

**3n**

((2*S*,3*S*,4*R*)-2-(*tert*-butyl)-4-(3,5-di-*tert*-butyl-4-hydroxyphenyl)chroman-3-yl)(1-methyl-1*H*-imidazol-2-yl)methanone

A dried 25 mL Schlenk tube was charged with  $\alpha,\beta$ -unsaturated 2-acylimidazole **1n** (38.5 mg, 0.20 mmol), *para*-quinone methides (*p*-QMs) **2a** (74.5 mg, 0.24 mmol),  $\text{K}_2\text{CO}_3$  (33.2 mg, 0.24 mmol) and chiral catalyst **A-Rh3** (5.0 mg, 3.0 mol%). The tube was purged with argon, then anhydrous toluene (0.6 mL) was added. The reaction mixture was stirred at 50°C for indicated time (monitored by TLC) under argon. After cooling to room temperature, the mixture was purified by flash column chromatography on silica gel (petroleum ether/ EtOAc = 10:1 to 5:1) to afford chiral product **3n** as colorless oil (95.6 mg, yield: 95%).

Enantiomeric excess was determined by HPLC analysis,  $ee = 99\%$ , Chiralpak column AD-H,  $\lambda = 254$  nm,  $n$ -hexane/*i*-PrOH = 98:2, flow rate: 1.0 mL/min, 30 °C,  $t_r$ (major) = 3.514 min,  $t_r$ (minor) = 5.295 min;

$[\alpha]_D^{25} = +104.1^\circ$  ( $c = 1.0$ ,  $\text{CHCl}_3$ );

IR (KBr)  $\nu_{\text{max}}$ : 3625, 3440, 2961, 2913, 2869, 1673, 1584, 1489, 1456, 1434, 1408, 1363  $\text{cm}^{-1}$ ;

$^1\text{H}$  NMR (400 MHz,  $\text{CDCl}_3$ ):  $\delta = 7.12$  (td,  $J = 7.6, 1.7$  Hz, 1H), 6.98 (s, 1H), 6.93 (dd,  $J = 8.2, 1.2$  Hz, 1H), 6.87 (s, 2H), 6.77 – 6.71 (m, 2H), 6.68 – 6.64 (m, 1H), 4.99 (s, 1H), 4.60 (t,  $J = 10.7$  Hz, 1H), 4.45 (d,  $J = 10.3$  Hz, 1H), 4.24 (d,  $J = 10.9$  Hz, 1H), 3.60 (s, 3H), 1.32 (s, 18H), 1.04 (s, 9H);

$^{13}\text{C}$  NMR (101 MHz,  $\text{CDCl}_3$ ):  $\delta = 194.43, 154.96, 152.34, 144.36, 135.26, 129.19, 127.86, 127.47, 127.46, 126.48, 126.24, 119.65, 115.88, 86.17, 49.01, 36.40, 35.61, 34.15, 30.34, 26.61$ ;

HRMS (ESI,  $m/z$ ) calcd. for  $\text{C}_{32}\text{H}_{42}\text{N}_2\text{O}_3\text{Na}^+$   $[\text{M}+\text{Na}]^+$ : 525.3088, found: 525.3086.

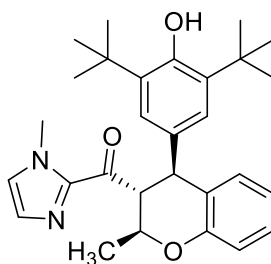

**3o**

((2S,3R,4S)-4-(3,5-di-*tert*-butyl-4-hydroxyphenyl)-2-methylchroman-3-yl)(1-methyl-1*H*-imidazol-2-yl)methanone

A dried 25 mL Schlenk tube was charged with  $\alpha,\beta$ -unsaturated 2-acylimidazole **1o** (30.1 mg, 0.20 mmol), *para*-quinone methides (*p*-QMs) **2a** (74.5 mg, 0.24 mmol),  $\text{K}_2\text{CO}_3$  (33.2 mg, 0.24 mmol) and chiral catalyst  $\Delta$ -**Rh3** (5.0 mg, 3.0 mol%). The tube was purged with argon, then anhydrous toluene (0.6 mL) was added. The reaction mixture was stirred at 50°C for indicated time (monitored by TLC) under argon. After cooling to room temperature, the mixture was purified by flash column chromatography on silica gel (petroleum ether/ EtOAc = 10:1 to 5:1) to afford chiral product **3o** as colorless oil (86.0 mg, yield: 93%).

Enantiomeric excess was determined by HPLC analysis, *ee* = 74%, Chiralpak column IC,  $\lambda$  = 254 nm, *n*-hexane/*i*-PrOH = 99.5:0.5, flow rate: 0.5 mL/min, 30 °C,  $t_r$ (minor) = 15.069 min,  $t_r$ (major) = 17.045 min;

$[\alpha]_D^{25} = +98.0^\circ$  ( $c = 1.0$ ,  $\text{CHCl}_3$ );

IR (KBr)  $\nu_{\text{max}}$ : 3634, 3421, 2958, 2886, 1665, 1585, 1483, 1454, 1435, 1409, 1361  $\text{cm}^{-1}$ ;

$^1\text{H}$  NMR (400 MHz,  $\text{CDCl}_3$ ):  $\delta = 7.10$  (ddd,  $J = 8.2, 5.2, 3.7$  Hz, 1H), 6.99 (d,  $J = 0.9$  Hz, 1H), 6.90 – 6.83 (m, 4H), 6.77 – 6.73 (m, 2H), 4.96 (s, 1H), 4.56 – 4.48 (m, 2H), 4.43 – 4.34 (m, 1H), 3.75 (s, 3H), 1.41 – 1.37 (m, 3H), 1.30 (s, 18H);

$^{13}\text{C}$  NMR (101 MHz,  $\text{CDCl}_3$ ):  $\delta = 194.32, 154.36, 152.33, 144.22, 135.42, 131.12, 129.38, 129.33, 127.41, 126.88, 126.33, 125.75, 120.04, 116.11, 74.45, 47.63, 35.84, 34.18, 30.32, 19.81$ ;

HRMS (ESI,  $m/z$ ) calcd. for  $\text{C}_{29}\text{H}_{36}\text{N}_2\text{O}_3\text{Na}^+$   $[\text{M}+\text{Na}]^+$ : 483.2618, found: 483.2618.

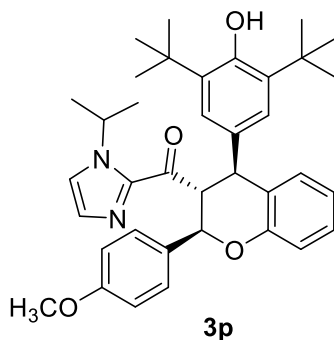

**3p**  
((2*R*,3*R*,4*S*)-4-(3,5-di-*tert*-butyl-4-hydroxyphenyl)-2-(4-methoxyphenyl)chroman-3-yl)(1-isopropyl-1*H*-imidazol-2-yl)methanone

A dried 25 mL Schlenk tube was charged with  $\alpha,\beta$ -unsaturated 2-acylimidazole **1p** (54.1 mg, 0.20 mmol), *para*-quinone methides (*p*-QMs) **2a** (74.5 mg, 0.24 mmol),  $\text{K}_2\text{CO}_3$  (33.2 mg, 0.24 mmol) and chiral catalyst  $\Delta$ -**Rh3** (5.0 mg, 3.0 mol%). The tube was purged with argon, then anhydrous toluene (0.6 mL) was added. The reaction mixture was stirred at 50°C for indicated time (monitored by TLC) under argon. After cooling to room temperature, the mixture was purified by flash column

chromatography on silica gel (petroleum ether/ EtOAc = 10:1 to 5:1) to afford chiral product **3p** as pale yellow oil (78.0 mg, yield: 67%).

Enantiomeric excess was determined by HPLC analysis, *ee* = 89%, Chiralpak column AD-H,  $\lambda$  = 254 nm, *n*-hexane/*i*-PrOH = 90:10, flow rate: 1.0 mL/min, 30 °C,  $t_r$ (major) = 4.320 min,  $t_r$ (minor) = 5.456 min;

$[\alpha]_D^{25} = +94.2^\circ$  ( $c = 1.0$ , CHCl<sub>3</sub>);

IR (KBr)  $\nu_{\max}$ : 3452, 2961, 1668, 1639, 1516, 1483, 1437, 1406, 1241 cm<sup>-1</sup>;

<sup>1</sup>H NMR (400 MHz, CDCl<sub>3</sub>):  $\delta$  = 7.46 (d,  $J = 8.3$  Hz, 2H), 7.15 – 7.08 (m, 1H), 6.99 – 6.88 (m, 5H), 6.81 – 6.71 (m, 4H), 5.39 (d,  $J = 9.8$  Hz, 1H), 5.22 – 5.00 (m, 2H), 4.96 (s, 1H), 4.59 (d,  $J = 11.4$  Hz, 1H), 3.72 (s, 3H), 1.29 (s, 18H), 1.13 (d,  $J = 6.7$  Hz, 3H), 0.92 (d,  $J = 6.6$  Hz, 3H);

<sup>13</sup>C NMR (101 MHz, CDCl<sub>3</sub>):  $\delta$  = 193.35, 159.52, 154.59, 152.45, 143.24, 135.39, 130.68, 130.30, 129.59, 129.40, 129.21, 127.46, 126.90, 126.20, 120.63, 120.26, 116.32, 113.58, 81.12, 55.19, 48.70, 34.17, 30.28, 26.93, 23.55, 22.71;

HRMS (ESI,  $m/z$ ) calcd. for C<sub>37</sub>H<sub>44</sub>N<sub>2</sub>O<sub>4</sub>Na<sup>+</sup> [M+Na]<sup>+</sup>: 603.3193, found: 603.3190.

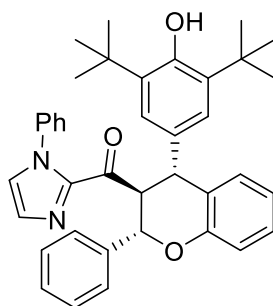

**3q**

((2S,3S,4R)-4-(3,5-di-*tert*-butyl-4-hydroxyphenyl)-2-phenylchroman-3-yl)(1-phenyl-1*H*-imidazol-2-yl)methanone

A dried 25 mL Schlenk tube was charged with  $\alpha,\beta$ -unsaturated 2-acylimidazole **1q** (54.1 mg, 0.20 mmol), *para*-quinone methides (*p*-QMs) **2a** (74.5 mg, 0.24 mmol), K<sub>2</sub>CO<sub>3</sub> (33.2 mg, 0.24 mmol) and chiral catalyst **A-Rh3** (5.0 mg, 3.0 mol%). The tube was purged with argon, then anhydrous toluene (0.6 mL) was added. The reaction mixture was stirred at 50°C for indicated time (monitored by TLC) under argon. After

cooling to room temperature, the mixture was purified by flash column chromatography on silica gel (petroleum ether/ EtOAc = 10:1 to 5:1) to afford chiral product **3q** as pale yellow oil (64.3 mg, yield: 55%).

Enantiomeric excess was determined by HPLC analysis, ee = 92%, Chiralpak column IG,  $\lambda = 254$  nm, *n*-hexane/*i*-PrOH = 96:4, flow rate: 1.0 mL/min, 30 °C,  $t_r(\text{minor}) = 7.232$  min,  $t_r(\text{major}) = 7.759$  min;

$[\alpha]_D^{25} = -239.8^\circ$  ( $c = 1.0$ ,  $\text{CHCl}_3$ );

IR (KBr)  $\nu_{\text{max}}$ : 3454, 2963, 1642, 1485, 1454, 1437, 1406  $\text{cm}^{-1}$ ;

$^1\text{H}$  NMR (400 MHz,  $\text{CDCl}_3$ ):  $\delta = 7.53$  (d,  $J = 7.6$  Hz, 2H), 7.40 – 7.22 (m, 6H), 7.15 (t,  $J = 7.6$  Hz, 1H), 7.08 – 7.01 (m, 3H), 6.96 (d,  $J = 8.1$  Hz, 1H), 6.88 – 6.79 (m, 2H), 6.77 – 6.71 (m, 1H), 6.58 (d,  $J = 7.5$  Hz, 2H), 5.41 (s, 1H), 5.07 (s, 1H), 4.60 (s, 1H), 1.37 (s, 18H);

$^{13}\text{C}$  NMR (101 MHz,  $\text{CDCl}_3$ ):  $\delta = 191.43, 154.40, 152.68, 143.52, 138.35, 138.00, 135.68, 130.17, 129.75, 129.15, 128.73, 128.52, 128.43, 128.27, 128.16, 127.58, 126.76, 126.43, 126.29, 125.30, 120.42, 116.36, 81.29, 48.34, 34.29, 30.39$ ;

HRMS (ESI,  $m/z$ ) calcd. for  $\text{C}_{39}\text{H}_{40}\text{N}_2\text{O}_3\text{Na}^+$   $[\text{M}+\text{Na}]^+$ : 607.2931, found: 607.2932.

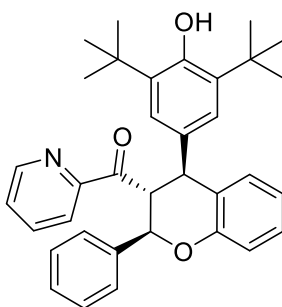

**3r**

((2*R*,3*R*,4*S*)-4-(3,5-di-*tert*-butyl-4-hydroxyphenyl)-2-phenylchroman-3-yl)(pyridin-2-yl)methanone

A dried 25 mL Schlenk tube was charged with **1r** (41.9 mg, 0.20 mmol), *para*-quinone methides (*p*-QMs) **2a** (74.5 mg, 0.24 mmol),  $\text{K}_2\text{CO}_3$  (33.2 mg, 0.24 mmol) and chiral catalyst  $\Delta$ -**Rh3** (5.0 mg, 3.0 mol%). The tube was purged with argon, then anhydrous toluene (0.6 mL) was added. The reaction mixture was stirred at 50°C

for indicated time (monitored by TLC) under argon. After cooling to room temperature, the mixture was purified by flash column chromatography on silica gel (petroleum ether/ EtOAc = 10:1 to 5:1) to afford chiral product **3r** as pale yellow oil (92.8 mg, yield: 89%).

Enantiomeric excess was determined by HPLC analysis, *ee* = 90%, Chiralpak column IG,  $\lambda$  = 254 nm, *n*-hexane/*i*-PrOH = 96:4, flow rate: 1.0 mL/min, 30 °C,  $t_r$ (major) = 6.975 min,  $t_r$ (minor) = 7.620 min;

$[\alpha]_D^{25} = +209.8^\circ$  ( $c = 1.0$ , CHCl<sub>3</sub>);

IR (KBr)  $\nu_{\max}$ : 3629, 3453, 2958, 1689, 1649, 1582, 1486, 1437, 1366 cm<sup>-1</sup>;

<sup>1</sup>H NMR (400 MHz, CDCl<sub>3</sub>):  $\delta$  = 8.34 (d,  $J = 4.7$  Hz, 1H), 7.52 – 7.42 (m, 4H), 7.21 – 7.10 (m, 5H), 6.97 (d,  $J = 8.4$  Hz, 1H), 6.92 – 6.78 (m, 4H), 5.48 – 5.33 (m, 2H), 4.91 – 4.85 (m, 1H), 4.59 (d,  $J = 11.0$  Hz, 1H), 1.25 (s, 18H);

<sup>13</sup>C NMR (101 MHz, CDCl<sub>3</sub>):  $\delta$  = 203.33, 154.80, 153.09, 152.33, 148.31, 138.40, 135.99, 135.34, 130.90, 129.46, 128.34, 128.17, 127.96, 127.56, 126.33, 126.27, 125.81, 121.40, 120.46, 116.51, 81.05, 48.52, 34.12, 30.24;

HRMS (ESI,  $m/z$ ) calcd. for C<sub>35</sub>H<sub>47</sub>NO<sub>3</sub>Na<sup>+</sup> [M+Na]<sup>+</sup>: 542.2666, found: 542.2663.

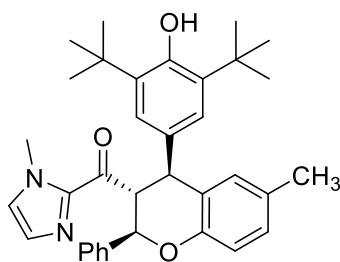

**4a**

((2*R*,3*R*,4*S*)-4-(3,5-di-*tert*-butyl-4-hydroxyphenyl)-6-methyl-2-phenylchroman-3-yl)(1-methyl-1*H*-imidazol-2-yl)methanone

A dried 25 mL Schlenk tube was charged with  $\alpha,\beta$ -unsaturated 2-acylimidazole **1a** (42.5 mg, 0.20 mmol), *para*-quinone methides (*p*-QMs) **2b** (77.9 mg, 0.24 mmol), K<sub>2</sub>CO<sub>3</sub> (33.2 mg, 0.24 mmol) and chiral catalyst  $\Delta$ -**Rh3** (5.0 mg, 3.0 mol%). The tube was purged with argon, then anhydrous toluene (0.6 mL) was added. The reaction

mixture was stirred at 50°C for indicated time (monitored by TLC) under argon. After cooling to room temperature, the mixture was purified by flash column chromatography on silica gel (petroleum ether/ EtOAc = 10:1 to 5:1) to afford chiral product **4a** as white solid (89.0 mg, yield: 83%).

Enantiomeric excess was determined by HPLC analysis, *ee* = 91%, Chiralpak column AD-H,  $\lambda$  = 254 nm, *n*-hexane/*i*-PrOH = 90:10, flow rate: 1.0 mL/min, 30 °C,  $t_r$ (minor) = 3.731 min,  $t_r$ (major) = 5.062 min;

$[\alpha]_D^{25} = +135.4^\circ$  ( $c = 1.0$ , CHCl<sub>3</sub>);

IR (KBr)  $\nu_{\max}$ : 3673, 3412, 3102, 2815, 1800, 1664, 1609, 1580, 1518, 1483, 1403, 1321 cm<sup>-1</sup>;

<sup>1</sup>H NMR (400 MHz, CDCl<sub>3</sub>):  $\delta$  = 7.52 – 7.45 (m, 2H), 7.28 – 7.13 (m, 4H), 6.98 – 6.79 (m, 5H), 6.64 (d,  $J = 3.9$  Hz, 2H), 5.38 (d,  $J = 10.0$  Hz, 1H), 4.96 (s, 1H), 4.90 (s, 1H), 4.58 (d,  $J = 11.4$  Hz, 1H), 3.58 (s, 3H), 2.17 (s, 3H), 1.31 (s, 18H);

<sup>13</sup>C NMR (101 MHz, CDCl<sub>3</sub>):  $\delta$  = 193.28, 152.60, 152.39, 143.74, 138.55, 135.35, 130.92, 129.56, 129.51, 129.07, 128.31, 128.23, 128.19, 127.82, 126.33, 125.88, 125.86, 116.23, 80.88, 48.26, 35.65, 34.20, 30.34, 20.66.

HRMS (ESI,  $m/z$ ) calcd. for C<sub>35</sub>H<sub>40</sub>N<sub>2</sub>O<sub>3</sub>Na<sup>+</sup> [M+Na]<sup>+</sup>: 559.2931, found: 559.2932.

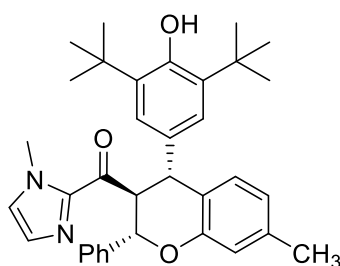

**4b**

((2*S*,3*S*,4*R*)-4-(3,5-di-*tert*-butyl-4-hydroxyphenyl)-7-methyl-2-phenylchroman-3-yl)(1-methyl-1*H*-imidazol-2-yl)methanone

A dried 25 mL Schlenk tube was charged with  $\alpha,\beta$ -unsaturated 2-acylimidazole **1a** (42.5 mg, 0.20 mmol), *para*-quinone methides (*p*-QMs) **2c** (77.9 mg, 0.24 mmol), K<sub>2</sub>CO<sub>3</sub> (33.2 mg, 0.24 mmol) and chiral catalyst  **$\Lambda$ -Rh3** (5.0 mg, 3.0 mol%). The tube



was purged with argon, then anhydrous toluene (0.6 mL) was added. The reaction mixture was stirred at 50°C for indicated time (monitored by TLC) under argon. After cooling to room temperature, the mixture was purified by flash column chromatography on silica gel (petroleum ether/ EtOAc = 10:1 to 5:1) to afford chiral product **4b** as pale yellow oil (86.0 mg, yield: 80%).

Enantiomeric excess was determined by HPLC analysis, *ee* = 96%, Chiralpak column AD-H,  $\lambda$  = 254 nm, *n*-hexane/*i*-PrOH = 99:1, flow rate: 1.0 mL/min, 30 °C,  $t_r$ (minor) = 15.912 min,  $t_r$ (major) = 19.574 min;

$[\alpha]_D^{25} = -87.5^\circ$  ( $c = 1.0$ , CHCl<sub>3</sub>);

IR (KBr)  $\nu_{\max}$ : 3615, 3450, 3197, 2977, 2816, 1740, 1602, 1571, 1545, 1483, 1404 cm<sup>-1</sup>;

<sup>1</sup>H NMR (400 MHz, CDCl<sub>3</sub>):  $\delta$  = 7.53 – 7.45 (m, 2H), 7.28 – 7.21 (m, 3H), 7.21 – 7.14 (m, 1H), 6.92 (s, 2H), 6.83 – 6.76 (m, 2H), 6.71 – 6.60 (m, 3H), 5.40 (d,  $J = 10.3$  Hz, 1H), 4.99 – 4.80 (m, 2H), 4.56 (d,  $J = 11.4$  Hz, 1H), 3.57 (s, 3H), 2.29 (s, 3H), 1.31 (s, 18H);

<sup>13</sup>C NMR (101 MHz, CDCl<sub>3</sub>):  $\delta$  = 193.29, 154.42, 152.38, 143.77, 138.52, 137.48, 135.34, 130.84, 129.14, 129.07, 128.33, 128.20, 127.82, 126.33, 125.83, 123.33, 121.41, 116.81, 80.97, 48.09, 35.65, 34.19, 30.32, 21.10.

HRMS (ESI,  $m/z$ ) calcd. for C<sub>35</sub>H<sub>40</sub>N<sub>2</sub>O<sub>3</sub>Na<sup>+</sup> [M+Na]<sup>+</sup>: 559.2937, found: 559.2931.

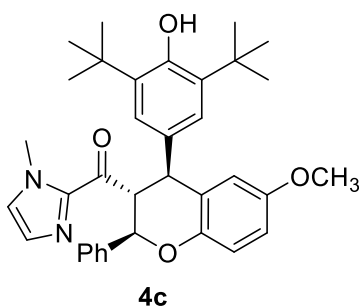

**4c**  
((2*R*,3*R*,4*S*)-4-(3,5-di-*tert*-butyl-4-hydroxyphenyl)-6-methoxy-2-phenylchroman-3-yl)(1-methyl-1*H*-imidazol-2-yl)methanone

A dried 25 mL Schlenk tube was charged with  $\alpha,\beta$ -unsaturated 2-acylimidazole **1a** (42.5 mg, 0.20 mmol), *para*-quinone methides (*p*-QMs) **2d** (81.7 mg, 0.24 mmol),

K<sub>2</sub>CO<sub>3</sub> (33.2 mg, 0.24 mmol) and chiral catalyst **Δ-Rh3** (5.0 mg, 3.0 mol%). The tube was purged with argon, then anhydrous toluene (0.6 mL) was added. The reaction mixture was stirred at 50°C for indicated time (monitored by TLC) under argon. After cooling to room temperature, the mixture was purified by flash column chromatography on silica gel (petroleum ether/ EtOAc = 10:1 to 5:1) to afford chiral product **4c** as white solid (96.2 mg, yield: 87%).

Enantiomeric excess was determined by HPLC analysis, *ee* = 96%, Chiralpak column IG, λ = 254 nm, *n*-hexane/*i*-PrOH = 90:10, flow rate: 1.0 mL/min, 30 °C, *t<sub>r</sub>*(major) = 4.868 min, *t<sub>r</sub>*(minor) = 6.069 min;

[α]<sub>D</sub><sup>25</sup> = +111.9° (*c* = 1.0, CHCl<sub>3</sub>);

IR (KBr) ν<sub>max</sub>: 3591, 2959, 2885, 1659, 1611, 1492, 1459, 1434, 1409 cm<sup>-1</sup>;

<sup>1</sup>H NMR (400 MHz, CDCl<sub>3</sub>): δ = 7.51 – 7.45 (m, 2H), 7.28 – 7.12 (m, 3H), 6.94 – 6.87 (m, 3H), 6.83 (s, 1H), 6.72 (dd, *J* = 8.9, 3.0 Hz, 1H), 6.64 (s, 1H), 6.38 – 6.34 (m, 1H), 5.37 (d, *J* = 10.0 Hz, 1H), 4.96 (s, 2H), 4.59 (d, *J* = 11.4 Hz, 1H), 3.63 (s, 3H), 3.57 (s, 3H), 1.31 (s, 18H);

<sup>13</sup>C NMR (101 MHz, CDCl<sub>3</sub>): δ = 193.19, 153.32, 152.47, 148.90, 143.73, 138.49, 135.44, 130.53, 129.05, 128.33, 128.18, 127.80, 127.18, 126.35, 125.82, 116.98, 114.48, 113.29, 81.00, 55.74, 48.36, 35.63, 34.19, 30.33;

HRMS (ESI, *m/z*) calcd. for C<sub>35</sub>H<sub>40</sub>N<sub>2</sub>O<sub>4</sub>Na<sup>+</sup> [*M*+Na]<sup>+</sup>: 575.2880, found: 575.2877.

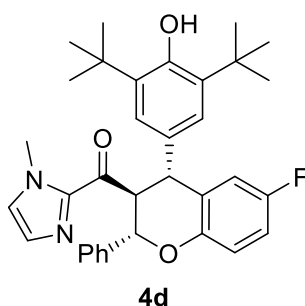

((2*S*,3*S*,4*R*)-4-(3,5-di-*tert*-butyl-4-hydroxyphenyl)-6-fluoro-2-phenylchroman-3-yl)(1-methyl-1*H*-imidazol-2-yl)methanone

A dried 25 mL Schlenk tube was charged with α,β-unsaturated 2-acylimidazole **1a** (42.5 mg, 0.20 mmol), *para*-quinone methides (*p*-QMs) **2e** (78.8 mg, 0.24 mmol),

K<sub>2</sub>CO<sub>3</sub> (33.2 mg, 0.24 mmol) and chiral catalyst **A-Rh3** (5.0 mg, 3.0 mol%). The tube was purged with argon, then anhydrous toluene (0.6 mL) was added. The reaction mixture was stirred at 50°C for indicated time (monitored by TLC) under argon. After cooling to room temperature, the mixture was purified by flash column chromatography on silica gel (petroleum ether/ EtOAc = 10:1 to 5:1) to afford chiral product **4d** as pale yellow oil (104.8 mg, yield: 97%).

Enantiomeric excess was determined by HPLC analysis, *ee* = 99%, Chiralpak column IC,  $\lambda$  = 254 nm, *n*-hexane/*i*-PrOH = 98:2, flow rate: 1.0 mL/min, 30 °C, *t<sub>r</sub>*(major) = 5.182 min, *t<sub>r</sub>*(minor) = 8.206 min;

$[\alpha]_D^{25} = -131.5^\circ$  (*c* = 1.0, CHCl<sub>3</sub>);

IR (KBr)  $\nu_{\max}$ : 3617, 3455, 2962, 2362, 1668, 1490, 1457, 1438, 1408, 1364 cm<sup>-1</sup>;

<sup>1</sup>H NMR (400 MHz, CDCl<sub>3</sub>):  $\delta$  = 7.47 (d, *J* = 7.3 Hz, 2H), 7.25 – 7.20 (m, 2H), 7.19 – 7.13 (m, 1H), 6.93 – 6.86 (m, 3H), 6.86 – 6.79 (m, 2H), 6.62 (s, 1H), 6.53 (dd, *J* = 9.6, 3.0 Hz, 1H), 5.39 (d, *J* = 10.0 Hz, 1H), 5.00 (s, 1H), 4.92 (s, 1H), 4.59 (d, *J* = 11.5 Hz, 1H), 3.54 (s, 3H), 1.32 (s, 18H);

<sup>13</sup>C NMR (101 MHz, CDCl<sub>3</sub>):  $\delta$  = 192.79, 158.09, 155.73, 152.66, 150.71 (d, *J* = 1.9 Hz, 1C), 143.65, 138.17, 135.66, 130.13, 129.14, 128.47, 128.23, 127.88, 127.80, 126.50, 125.76, 117.38 (d, *J* = 7.9 Hz, 1C), 115.25 (d, *J* = 23.7 Hz, 1C), 114.39 (d, *J* = 23.5 Hz, 1C), 81.14, 48.24, 35.60, 34.21, 30.31;

<sup>19</sup>F NMR (376 MHz, CDCl<sub>3</sub>):  $\delta$  = -123.44;

HRMS (ESI, *m/z*) calcd. for C<sub>34</sub>H<sub>37</sub>FN<sub>2</sub>O<sub>3</sub>Na<sup>+</sup> [*M*+Na]<sup>+</sup>: 563.2680, found: 563.2677.

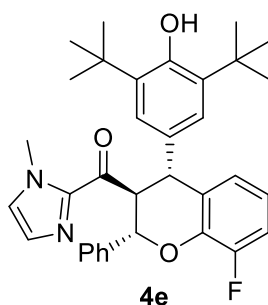

((2*S*,3*S*,4*R*)-4-(3,5-di-*tert*-butyl-4-hydroxyphenyl)-8-fluoro-2-phenylchroman-3-yl)(1-methyl-1*H*-imidazol-2-yl)methanone

A dried 25 mL Schlenk tube was charged with  $\alpha,\beta$ -unsaturated 2-acylimidazole **1a** (42.5 mg, 0.20 mmol), *para*-quinone methides (*p*-QMs) **2f** (78.8 mg, 0.24 mmol), K<sub>2</sub>CO<sub>3</sub> (33.2 mg, 0.24 mmol) and chiral catalyst  **$\Lambda$ -Rh3** (5.0 mg, 3.0 mol%). The tube was purged with argon, then anhydrous toluene (0.6 mL) was added. The reaction mixture was stirred at 50°C for indicated time (monitored by TLC) under argon. After cooling to room temperature, the mixture was purified by flash column chromatography on silica gel (petroleum ether/ EtOAc = 10:1 to 5:1) to afford chiral product **4e** as pale yellow oil (97.7 mg, yield: 90%).

Enantiomeric excess was determined by HPLC analysis, *ee* = 90%, Chiralpak column ID,  $\lambda$  = 254 nm, *n*-hexane/*i*-PrOH = 99:1, flow rate: 1.0 mL/min, 30 °C,  $t_r(\text{minor})$  = 9.096 min,  $t_r(\text{major})$  = 10.637 min;

$[\alpha]_D^{25}$  = -81.0° (*c* = 1.0, CHCl<sub>3</sub>);

IR (KBr)  $\nu_{\text{max}}$ : 3626, 2961, 2910, 1670, 1587, 1478, 1435, 1403 cm<sup>-1</sup>;

<sup>1</sup>H NMR (400 MHz, CDCl<sub>3</sub>):  $\delta$  = 7.51 – 7.45 (m, 2H), 7.27 – 7.20 (m, 2H), 7.20 – 7.14 (m, 1H), 6.99 – 6.92 (m, 1H), 6.90 (s, 2H), 6.83 (s, 1H), 6.72 (td, *J* = 8.0, 4.9 Hz, 1H), 6.65 (s, 1H), 6.61 – 6.56 (m, 1H), 5.47 (d, *J* = 9.6 Hz, 1H), 4.98 (s, 2H), 4.63 (d, *J* = 11.4 Hz, 1H), 3.58 (s, 3H), 1.31 (s, 18H);

<sup>13</sup>C NMR (101 MHz, CDCl<sub>3</sub>):  $\delta$  = 192.60, 152.55, 150.09, 143.60, 143.13, 143.02, 137.79, 135.49, 130.33, 129.09, 128.47, 128.21, 127.84 (d, *J* = 270.0 Hz, 1C), 127.83, 125.79, 124.33 (d, *J* = 3.4 Hz, 1C), 119.59 (d, *J* = 7.3 Hz, 1C), 113.96 (d, *J* = 17.8 Hz, 1C), 81.30, 48.01 (d, *J* = 2.5 Hz, 1C), 35.66, 34.20, 30.30;

<sup>19</sup>F NMR (376 MHz, CDCl<sub>3</sub>):  $\delta$  = -136.74;

HRMS (ESI, *m/z*) calcd. for C<sub>34</sub>H<sub>37</sub>FN<sub>2</sub>O<sub>3</sub>Na<sup>+</sup> [M+Na]<sup>+</sup>: 563.2686, found: 563.2684.

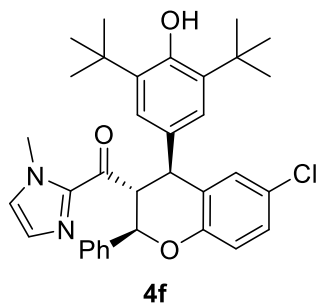

((2*R*,3*R*,4*S*)-6-chloro-4-(3,5-di-*tert*-butyl-4-hydroxyphenyl)-2-phenylchroman-3-yl)(1-methyl-1*H*-imidazol-2-yl)methanone

A dried 25 mL Schlenk tube was charged with  $\alpha,\beta$ -unsaturated 2-acylimidazole **1a** (42.5 mg, 0.20 mmol), *para*-quinone methides (*p*-QMs) **2g** (82.8 mg, 0.24 mmol), K<sub>2</sub>CO<sub>3</sub> (33.2 mg, 0.24 mmol) and chiral catalyst  $\Delta$ -**Rh3** (5.0 mg, 3.0 mol%). The tube was purged with argon, then anhydrous toluene (0.6 mL) was added. The reaction mixture was stirred at 50°C for indicated time (monitored by TLC) under argon. After cooling to room temperature, the mixture was purified by flash column chromatography on silica gel (petroleum ether/ EtOAc = 10:1 to 5:1) to afford chiral product **4f** as white solid (108.1 mg, yield: 97%).

Enantiomeric excess was determined by HPLC analysis, *ee* = 96%, Chiralpak column AD-H,  $\lambda$  = 254 nm, *n*-hexane/*i*-PrOH = 95:5, flow rate: 1.0 mL/min, 30 °C, *t<sub>r</sub>*(major) = 5.341 min, *t<sub>r</sub>*(minor) = 10.197 min;

$[\alpha]_D^{25}$  = +106.9° (*c* = 1.0, CHCl<sub>3</sub>);

IR (KBr)  $\nu_{\max}$ : 3618, 3431, 2959, 1668, 2921, 2875, 1631, 1599, 1572, 1476, 1456, 1439, 1405, 1364 cm<sup>-1</sup>;

<sup>1</sup>H NMR (400 MHz, CDCl<sub>3</sub>):  $\delta$  = 7.51 – 7.44 (m, 2H), 7.26 – 7.16 (m, 3H), 7.09 (dd, *J* = 8.7, 2.6 Hz, 1H), 6.92 – 6.86 (m, 3H), 6.85 – 6.78 (m, 2H), 6.66 (s, 1H), 5.40 (d, *J* = 10.1 Hz, 1H), 4.99 (s, 1H), 4.89 (s, 1H), 4.57 (d, *J* = 11.4 Hz, 1H), 3.57 (s, 3H), 1.32 (s, 18H);

<sup>13</sup>C NMR (101 MHz, CDCl<sub>3</sub>):  $\delta$  = 192.62, 153.35, 152.67, 143.60, 138.00, 135.65, 129.92, 129.17, 128.89, 128.51, 128.25, 128.11, 127.78, 127.63, 126.49, 125.75, 125.26, 117.91, 81.14, 48.12, 35.64, 34.20, 30.29;

HRMS (ESI, *m/z*) calcd. for C<sub>34</sub>H<sub>37</sub>ClN<sub>2</sub>O<sub>3</sub>Na<sup>+</sup> [M+Na]<sup>+</sup>: 579.2385, found: 579.2386.

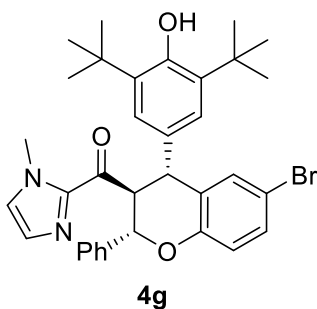

((2*S*,3*S*,4*R*)-6-bromo-4-(3,5-di-*tert*-butyl-4-hydroxyphenyl)-2-phenylchroman-3-yl)(1-methyl-1*H*-imidazol-2-yl)methanone

A dried 25 mL Schlenk tube was charged with  $\alpha,\beta$ -unsaturated 2-acylimidazole **1a** (42.5 mg, 0.20 mmol), *para*-quinone methides (*p*-QMs) **2h** (93.4 mg, 0.24 mmol),  $K_2CO_3$  (33.2 mg, 0.24 mmol) and chiral catalyst **A-Rh3** (5.0 mg, 3.0 mol%). The tube was purged with argon, then anhydrous toluene (0.6 mL) was added. The reaction mixture was stirred at 50°C for indicated time (monitored by TLC) under argon. After cooling to room temperature, the mixture was purified by flash column chromatography on silica gel (petroleum ether/ EtOAc = 10:1 to 5:1) to afford chiral product **4g** as pale yellow oil (115.5 mg, yield: 96%).

Enantiomeric excess was determined by HPLC analysis, *ee* = 98%, Chiralpak column IG,  $\lambda$  = 254 nm, *n*-hexane/*i*-PrOH = 98:2, flow rate: 1.0 mL/min, 30 °C,  $t_r$ (major) = 6.724min,  $t_r$ (minor) = 10.096 min;

$[\alpha]_D^{25} = -84.2^\circ$  ( $c = 1.0$ ,  $CHCl_3$ );

IR (KBr)  $\nu_{max}$ : 3603, 3537, 2872, 1633, 1596, 1536, 1506, 1485, 1480, 1439, 1272  $cm^{-1}$

$^1H$  NMR (400 MHz,  $CDCl_3$ ):  $\delta = 7.52 - 7.43$  (m, 2H), 7.27 – 7.14 (m, 3H), 7.09 (dd,  $J = 8.7, 2.6$  Hz, 1H), 6.92 – 6.86 (m, 3H), 6.86 – 6.77 (m, 2H), 6.66 (s, 1H), 5.40 (d,  $J = 10.1$  Hz, 1H), 4.99 (s, 1H), 4.89 (s, 1H), 4.57 (d,  $J = 11.4$  Hz, 1H), 3.57 (s, 3H), 1.32 (s, 18H);

$^{13}C$  NMR (101 MHz,  $CDCl_3$ ):  $\delta = 192.62, 153.35, 152.67, 143.60, 138.00, 135.65, 129.92, 129.17, 128.89, 128.51, 128.25, 128.11, 127.78, 127.63, 126.49, 125.75, 125.26, 117.91, 81.14, 48.12, 35.64, 34.20, 30.29$ ;

HRMS (ESI,  $m/z$ ) calcd. for  $C_{34}H_{37}BrN_2O_3Na^+$  [ $M+Na$ ] $^+$ : 623.1880, found: 623.1878.

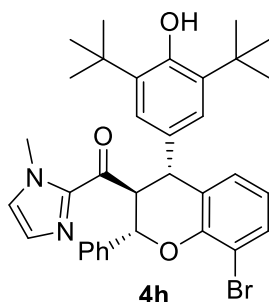

((2*S*,3*S*,4*R*)-8-bromo-4-(3,5-di-*tert*-butyl-4-hydroxyphenyl)-2-phenylchroman-3-yl)(1-methyl-1*H*-imidazol-2-yl)methanone

A dried 25 mL Schlenk tube was charged with  $\alpha,\beta$ -unsaturated 2-acylimidazole **1a** (42.5 mg, 0.20 mmol), *para*-quinone methides (*p*-QMs) **2i** (93.4 mg, 0.24 mmol),  $K_2CO_3$  (33.2 mg, 0.24 mmol) and chiral catalyst **A-Rh3** (5.0 mg, 3.0 mol%). The tube was purged with argon, then anhydrous toluene (0.6 mL) was added. The reaction mixture was stirred at 50°C for indicated time (monitored by TLC) under argon. After cooling to room temperature, the mixture was purified by flash column chromatography on silica gel (petroleum ether/ EtOAc = 10:1 to 5:1) to afford chiral product **4h** as pale yellow oil (81.0 mg, yield: 67%).

Enantiomeric excess was determined by HPLC analysis,  $ee = 95\%$ , Chiralpak column OD-H,  $\lambda = 254$  nm, *n*-hexane/*i*-PrOH = 98:2, flow rate: 1.0 mL/min, 30 °C,  $t_r(\text{minor}) = 5.877$  min,  $t_r(\text{major}) = 9.131$  min;

$[\alpha]_D^{25} = -107.3^\circ$  ( $c = 1.0$ ,  $CHCl_3$ );

IR (KBr)  $\nu_{\text{max}}$ : 2360, 2340, 1868, 1843, 1828, 1791, 1772, 1716, 1699, 1683, 1670, 1653, 1647, 1635, 1616, 1575, 1569, 1558, 1540, 1521, 1506, 1496, 1489, 1473, 1458, 1437, 1419, 1396, 1386  $cm^{-1}$

$^1H$  NMR (400 MHz,  $CDCl_3$ ):  $\delta = 7.51 - 7.45$  (m, 2H), 7.43 - 7.38 (m, 1H), 7.27 - 7.21 (m, 2H), 7.20 - 7.14 (m, 1H), 6.89 (s, 2H), 6.81 (s, 1H), 6.75 (dt,  $J = 7.8, 1.4$  Hz, 1H), 6.70 - 6.64 (m, 2H), 5.54 (d,  $J = 10.0$  Hz, 1H), 4.98 (s, 1H), 4.87 (s, 1H), 4.63 (d,  $J = 11.4$  Hz, 1H), 3.59 (s, 3H), 1.30 (s, 18H);

$^{13}\text{C}$  NMR (101 MHz,  $\text{CDCl}_3$ ):  $\delta = 192.51, 152.52, 151.10, 143.61, 138.06, 135.49,$   
 $131.27, 130.16, 129.18, 128.60, 128.29, 128.26, 128.12, 127.48, 126.47, 125.84,$   
 $120.93, 110.53, 81.49, 48.07, 35.63, 34.17, 30.27;$   
HRMS (ESI,  $m/z$ ) calcd. for  $\text{C}_{34}\text{H}_{37}\text{BrN}_2\text{O}_3\text{Na}^+ [\text{M}+\text{Na}]^+$ : 623.1880, found: 623.1882.

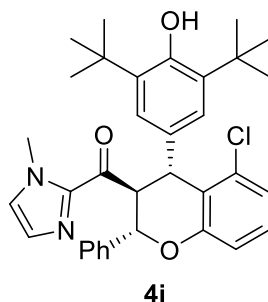

**4i**  
((2*S*,3*S*,4*R*)-5-chloro-4-(3,5-di-*tert*-butyl-4-hydroxyphenyl)-2-phenylchroman-3-yl)(1-methyl-1*H*-imidazol-2-yl)methanone

A dried 25 mL Schlenk tube was charged with  $\alpha,\beta$ -unsaturated 2-acylimidazole **1a** (42.5 mg, 0.20 mmol), *para*-quinone methides (*p*-QMs) **2j** (82.8 mg, 0.24 mmol),  $\text{K}_2\text{CO}_3$  (33.2 mg, 0.24 mmol) and chiral catalyst  **$\Lambda$ -Rh3** (5.0 mg, 3.0 mol%). The tube was purged with argon, then anhydrous toluene (0.6 mL) was added. The reaction mixture was stirred at 50°C for 48 hours under argon. After cooling to room temperature, the mixture was purified by flash column chromatography on silica gel (dichloromethane as eluent) to afford chiral product **4i** as pale yellow oil (19.4 mg, yield: 17%).

Enantiomeric excess was determined by HPLC analysis,  $ee = 98\%$ , Chiralpak column ID,  $\lambda = 254$  nm, *n*-hexane/*i*-PrOH = 95:5, flow rate: 1.0 mL/min, 30 °C,  $t_r(\text{minor}) = 12.955$  min,  $t_r(\text{major}) = 15.404$  min;

$[\alpha]_{\text{D}}^{25} = -145.3^\circ$  ( $c = 1.0$ ,  $\text{CHCl}_3$ );

IR (KBr)  $\nu_{\text{max}}$ : 3615, 3450, 3197, 2977, 2816, 1740, 1602, 1571, 1545, 1483, 1404  $\text{cm}^{-1}$ ;

$^1\text{H}$  NMR (400 MHz,  $\text{CDCl}_3$ ):  $\delta = 7.33 - 7.21$  (m, 4H), 7.20 - 7.14 (m, 1H), 7.13 - 6.91 (m, 6H), 6.83 - 6.75 (m, 1H), 5.24 (dd,  $J = 9.2, 5.8$  Hz, 1H), 3.99 (ddd,  $J = 17.7,$



9.2, 3.1 Hz, 1H), 3.92 (d,  $J = 3.3$  Hz, 3H), 3.73 (dd,  $J = 17.5, 6.2$  Hz, 1H), 1.31 (s, 9H), 1.19 (s, 9H);

$^{13}\text{C}$  NMR (101 MHz,  $\text{CDCl}_3$ ):

Major,  $\delta = 189.73, 186.62, 152.65, 149.24, 148.13, 142.61, 142.44, 135.17, 134.05, 133.99, 133.85, 129.66, 128.84, 128.53, 128.07, 127.16, 121.76, 114.79, 44.28, 41.40, 36.30, 35.32, 29.45$ ;

Minor,  $\delta = 189.61, 186.66, 152.91, 148.99, 148.02, 142.50, 142.38, 135.38, 134.11, 133.89, 133.80, 129.61, 128.75, 128.62, 128.04, 126.56, 121.89, 114.71, 44.42, 41.30, 36.34, 35.30, 29.50$ .

HRMS (ESI,  $m/z$ ) calcd. for  $\text{C}_{34}\text{H}_{37}\text{ClN}_2\text{O}_3\text{Na}^+$   $[\text{M}+\text{Na}]^+$ : 579.2385, found: 579.2384.

## 5. Synthetic Transformations

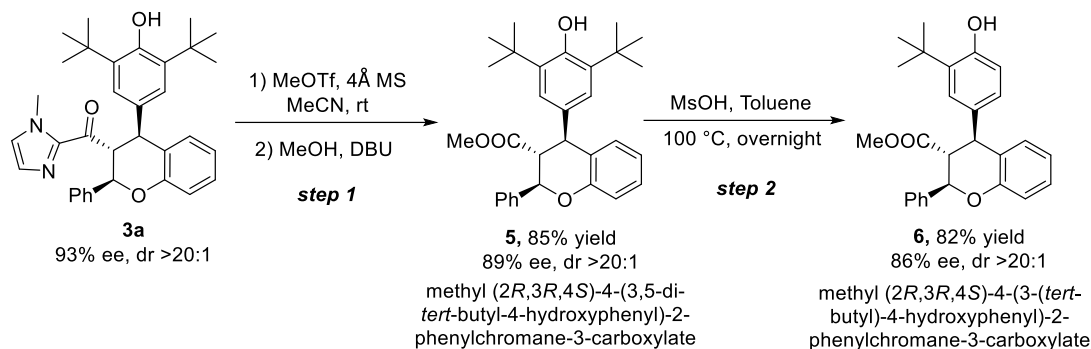

### Step 1:

The directing imidazole moiety was cleaved according to a reported procedure with slight modification.<sup>[7]</sup> 4 Å MS (172 mg, 100 mg/0.1 mmol of **3a**) was added to a solution of **3a** (90.0 mg, 0.172 mmol) in dry CH<sub>3</sub>CN (1.7 mL) under argon atmosphere. The suspension was stirred vigorously under a positive pressure of argon for 2 hours at 25°C. Then methyl trifluoromethanesulfonate (78 uL, 0.688 mmol, 4.0 eq.) was added. After being stirred at 25°C for 12 hours, MeOH (1.0 mL) and DBU (39 uL, 0.258 mmol, 1.5 eq.) were subsequently added. After being stirred at 25 °C for 40 min, the reaction mixture was concentrated and the residue was subjected to a silica gel flash chromatography (petroleum ether/ EtOAc = 20:1 to 10:1) to afford products **5** as pale yellow oil (69.0 mg, yield: 85%).

Enantiomeric excess was determined by HPLC analysis, *ee* = 89%, Chiralpak column OD-H,  $\lambda$  = 254 nm, *n*-hexane/*i*-PrOH = 99:1, flow rate: 1.0 mL/min, 30 °C,  $t_r$ (major) = 4.723 min,  $t_r$ (minor) = 6.018 min;

$[\alpha]_D^{25} = +176.0^\circ$  ( $c = 1.0$ , CHCl<sub>3</sub>);

IR (KBr)  $\nu_{\max}$ : 3564, 2848, 1731, 1601, 1534, 1425, 1400, 1289 cm<sup>-1</sup>

<sup>1</sup>H NMR (400 MHz, CDCl<sub>3</sub>):  $\delta$  = 7.47 – 7.43 (m, 2H), 7.40 – 7.31 (m, 3H), 7.18 – 7.12 (m, 1H), 6.95 (dd,  $J = 8.2, 1.2$  Hz, 1H), 6.91 – 6.82 (m, 4H), 5.20 (d,  $J = 10.1$  Hz, 1H), 5.11 (s, 1H), 4.54 (d,  $J = 11.4$  Hz, 1H), 3.21 (s, 3H), 3.11 (dd,  $J = 11.4, 10.1$  Hz, 1H), 1.38 (s, 18H);

$^{13}\text{C}$  NMR (101 MHz,  $\text{CDCl}_3$ ):  $\delta = 172.33, 154.69, 152.81, 138.45, 135.89, 131.71, 129.81, 128.75, 128.55, 127.73, 127.05, 125.24, 124.97, 120.88, 116.65, 79.84, 55.62, 51.39, 46.92, 34.33, 30.40$ ;

HRMS (ESI,  $m/z$ ) calcd. for  $\text{C}_{31}\text{H}_{36}\text{O}_4\text{Na}^+$   $[\text{M}+\text{Na}]^+$ : 495.2506, found: 495.2505.

## Step 2:

To a solution of **5** (47.2 mg, 0.1 mmol) in anhydrous toluene (2 mL) was added methanesulfonic acid (144.2 mg, 1.5 mmol) at ambient temperature, then stirred at 100 °C overnight and monitored by TLC. The reaction was quenched with the addition of  $\text{H}_2\text{O}$  (10 mL) and the mixture was then extracted with EtOAc. The combined organic layer was concentrated in vacuum and the residue purified by flash column chromatography on silica gel chromatography (petroleum ether/EtOAc = 8:1) to afford product **6** as white solid (34.2 mg, 82% yield). The racemic reaction was carried out in the same conditions.

Enantiomeric excess was determined by HPLC analysis,  $ee = 86\%$ , Chiralpak column IC,  $\lambda = 254$  nm,  $n$ -hexane/ $i$ -PrOH = 95:5, flow rate: 1.0 mL/min, 30 °C,  $t_r(\text{major}) = 4.601$  min,  $t_r(\text{minor}) = 6.443$  min;

$[\alpha]_{\text{D}}^{25} = +231.8^\circ$  ( $c = 1.0, \text{CHCl}_3$ );

IR (KBr)  $\nu_{\text{max}}$ : 3513, 2792, 1702, 1643, 1534, 1490, 1432, 1376, 1325, 1288  $\text{cm}^{-1}$

$^1\text{H}$  NMR (400 MHz,  $\text{CDCl}_3$ ):  $\delta = 7.47 - 7.41$  (m, 2H), 7.41 - 7.31 (m, 3H), 7.19 - 7.09 (m, 1H), 7.05 (d,  $J = 2.2$  Hz, 1H), 6.94 (d,  $J = 8.1$  Hz, 1H), 6.87 - 6.79 (m, 3H), 6.55 (d,  $J = 8.1$  Hz, 1H), 5.18 (d,  $J = 10.1$  Hz, 1H), 4.99 (s, 1H), 4.55 (d,  $J = 11.4$  Hz, 1H), 3.21 (s, 3H), 3.14 (dd,  $J = 11.5, 10.1$  Hz, 1H), 1.36 (s, 9H);

$^{13}\text{C}$  NMR (101 MHz,  $\text{CDCl}_3$ ):  $\delta = 172.42, 154.67, 153.36, 138.28, 136.09, 133.13, 129.77, 128.83, 128.57, 127.91, 127.83, 127.05, 126.75, 124.91, 120.99, 116.93, 116.73, 79.74, 55.67, 51.54, 46.52, 34.54, 29.64$ ;

HRMS (ESI,  $m/z$ ) calcd. for  $\text{C}_{27}\text{H}_{28}\text{O}_4\text{Na}^+$   $[\text{M}+\text{Na}]^+$ : 439.1880, found: 439.1882.

## 6. $^1\text{H}$ NMR and $^{13}\text{C}$ NMR Spectra

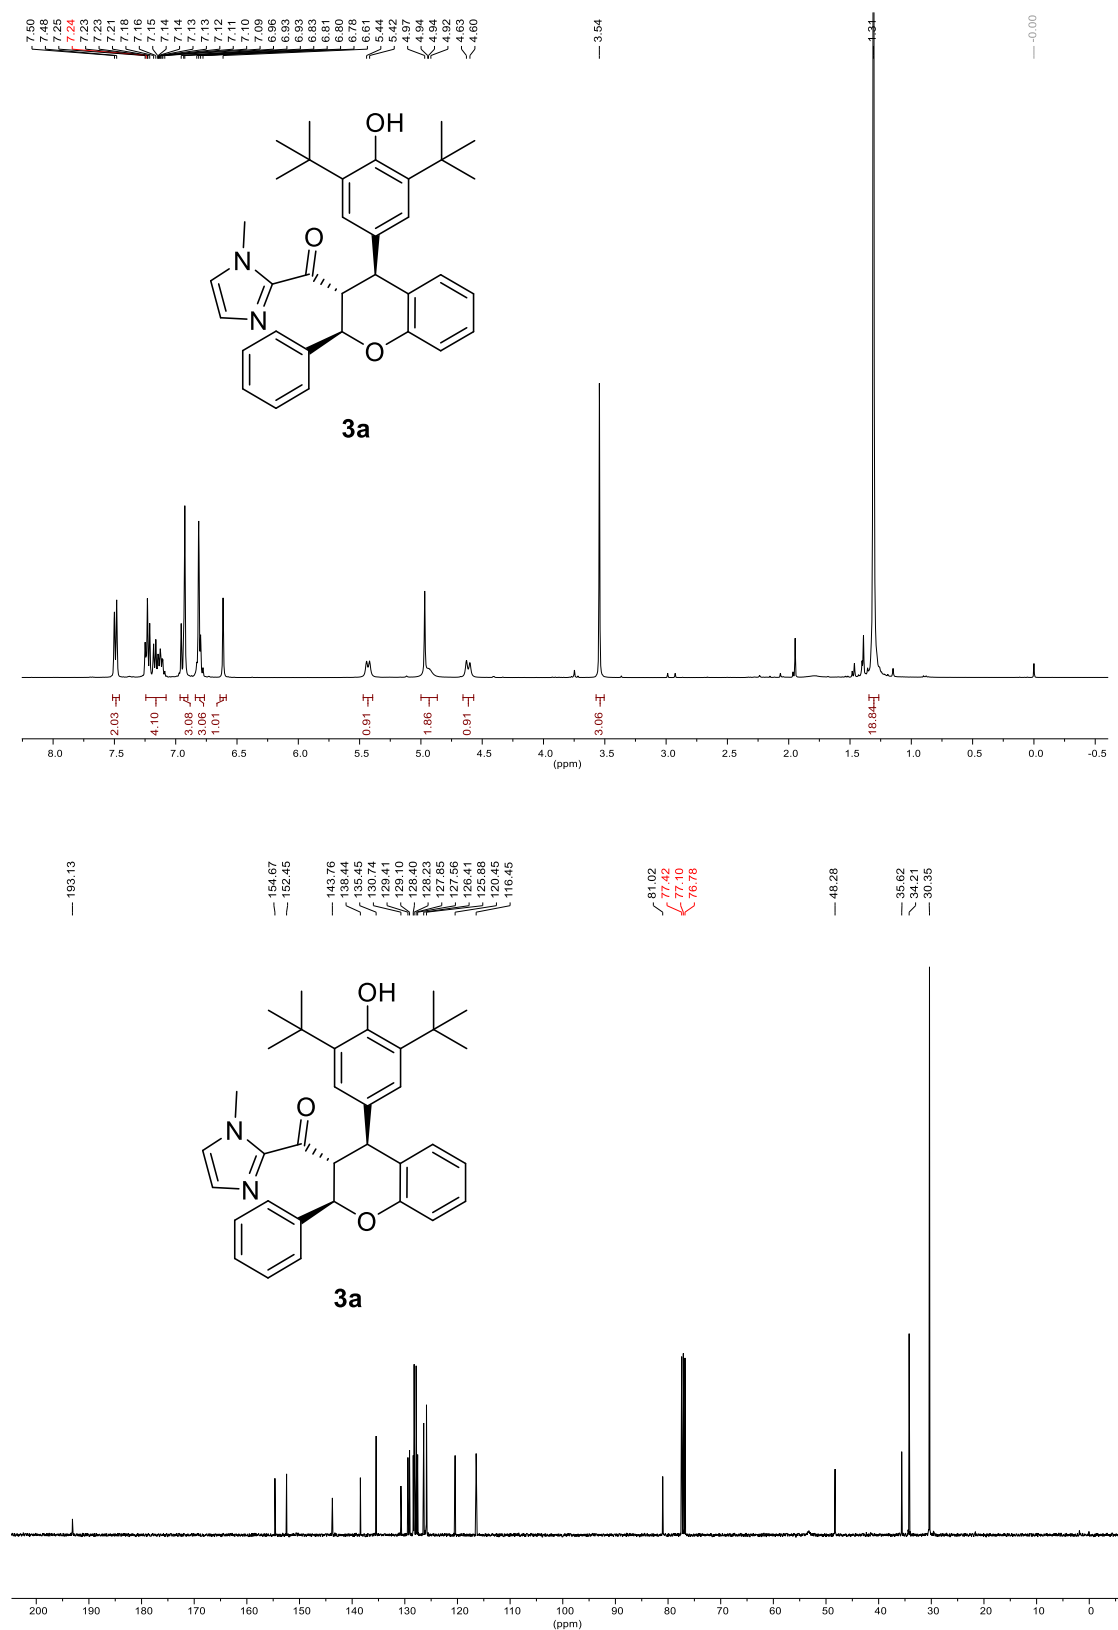

Figure S1.  $^1\text{H}$  and  $^{13}\text{C}$  NMR spectrum of **3a**.

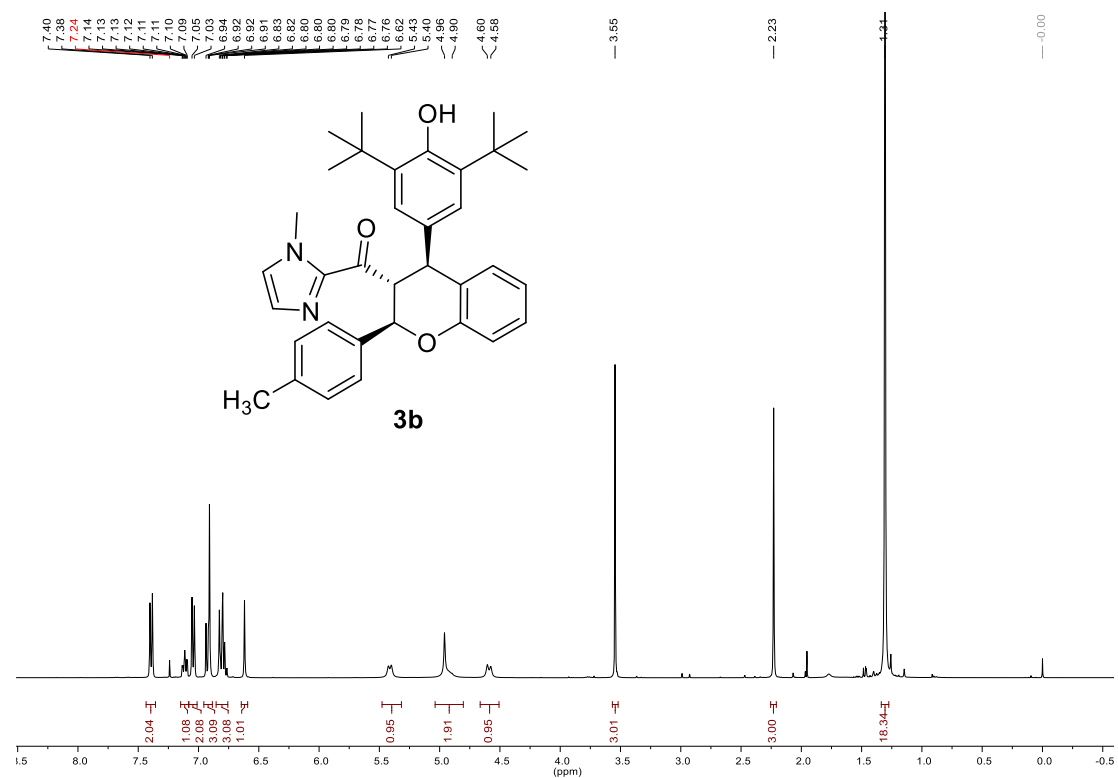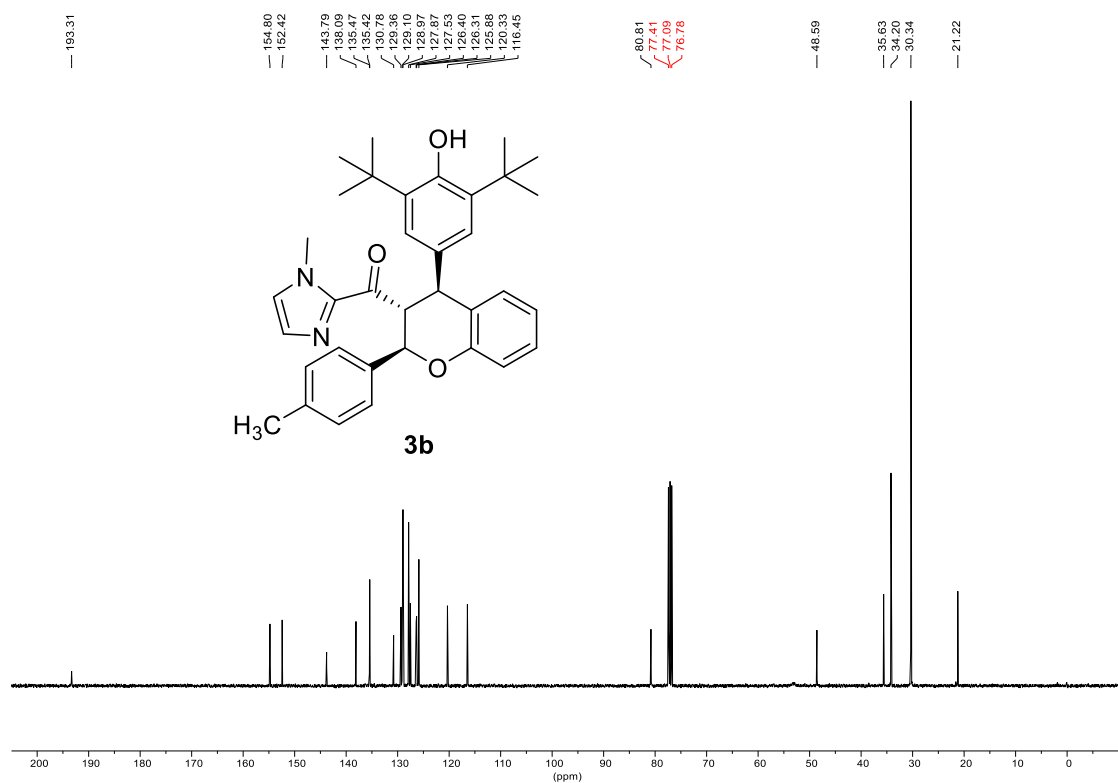

**Figure S2.** <sup>1</sup>H and <sup>13</sup>C NMR spectrum of **3b**.

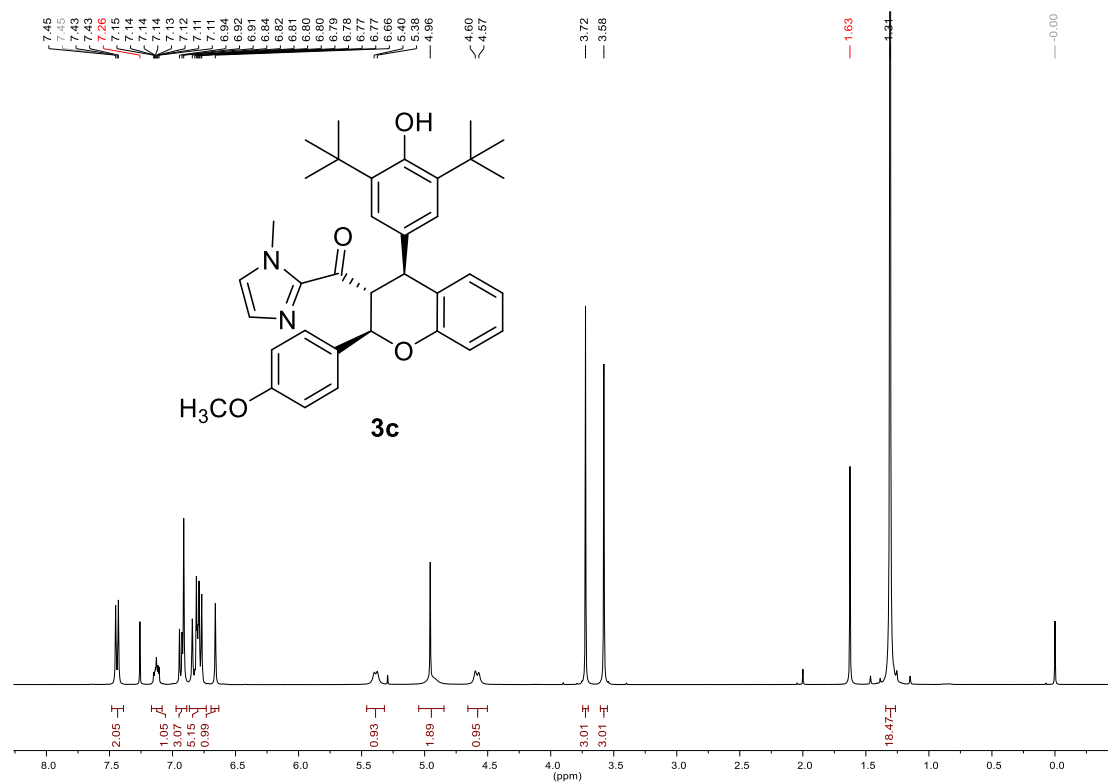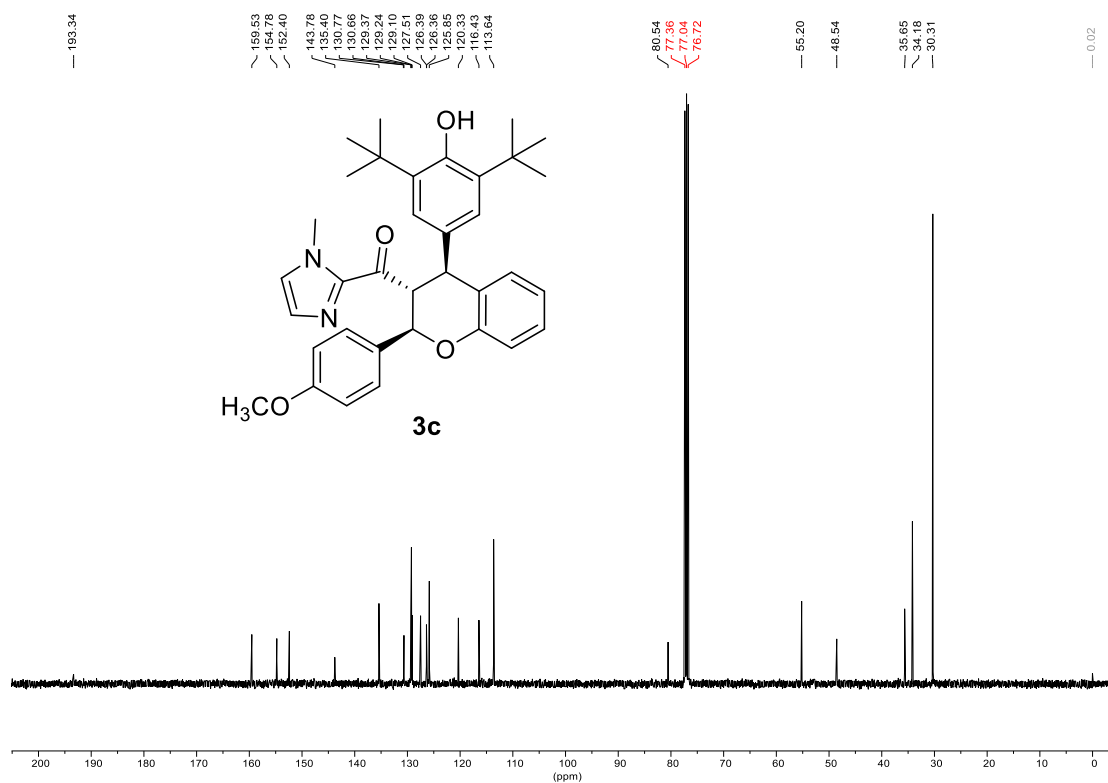

**Figure S3.** <sup>1</sup>H and <sup>13</sup>C NMR spectrum of 3c.



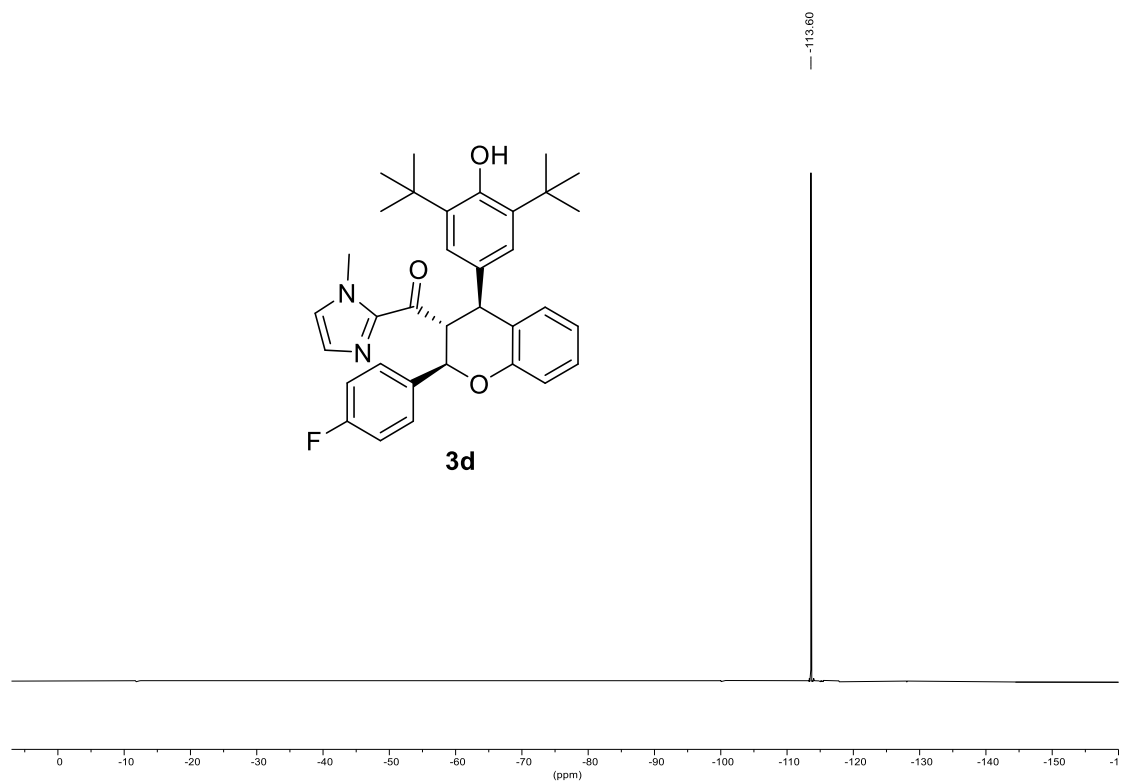

**Figure S4.**  $^1\text{H}$ ,  $^{13}\text{C}$  and  $^{19}\text{F}$  NMR spectrum of **3d**.



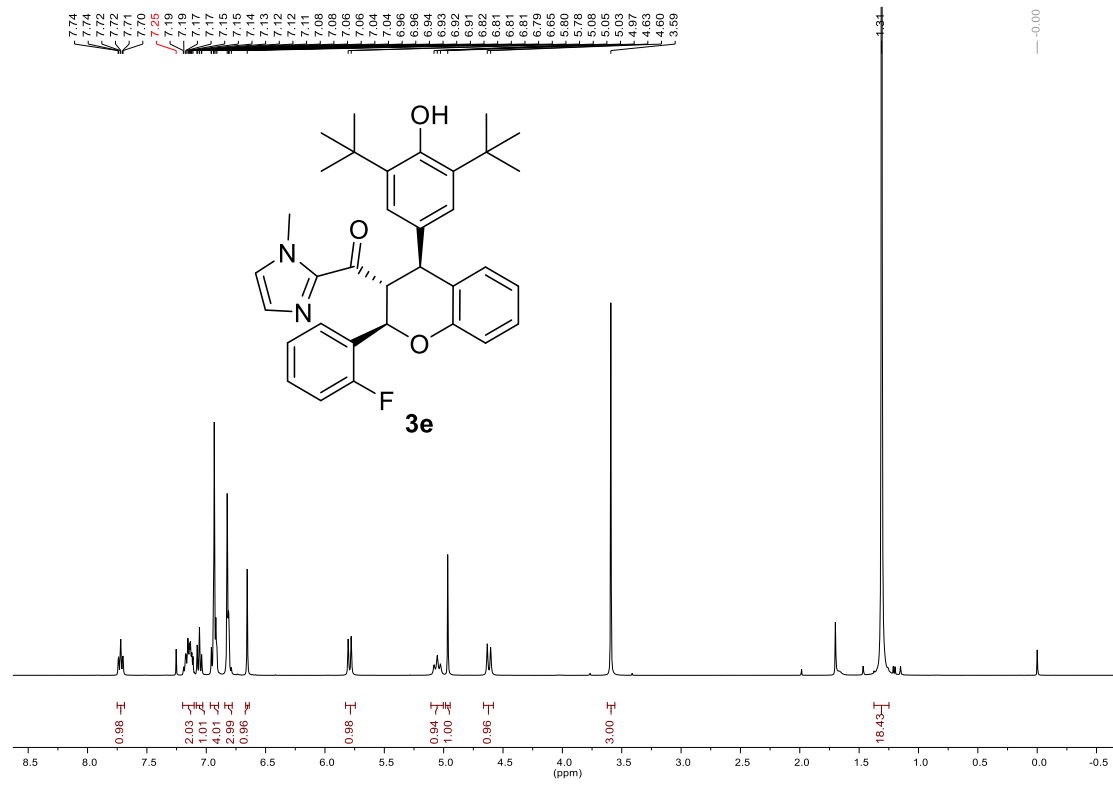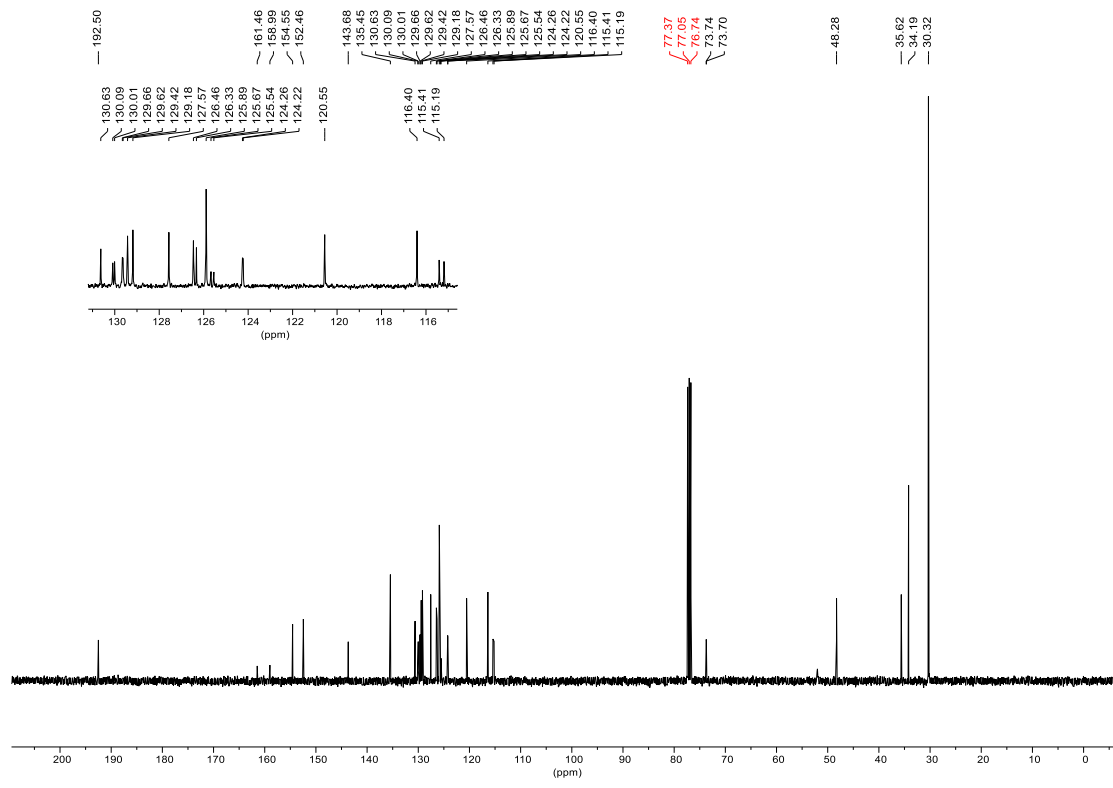

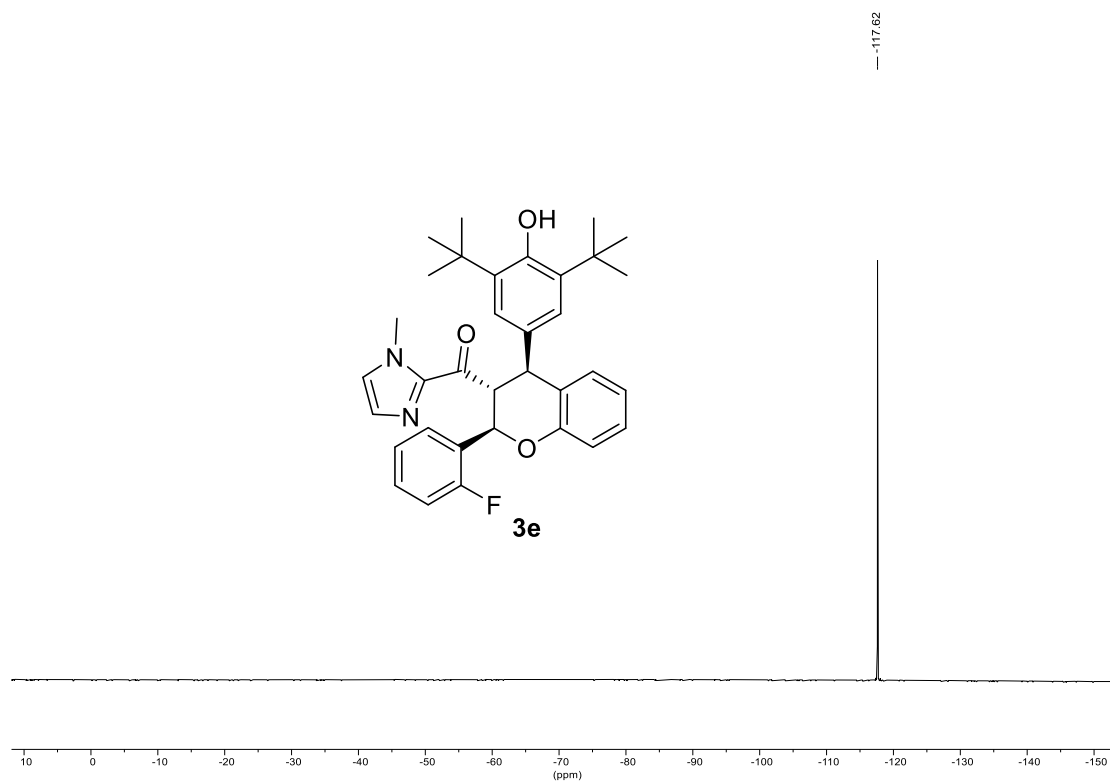

**Figure S5.**  $^1\text{H}$ ,  $^{13}\text{C}$  and  $^{19}\text{F}$  NMR spectrum of **3e**.

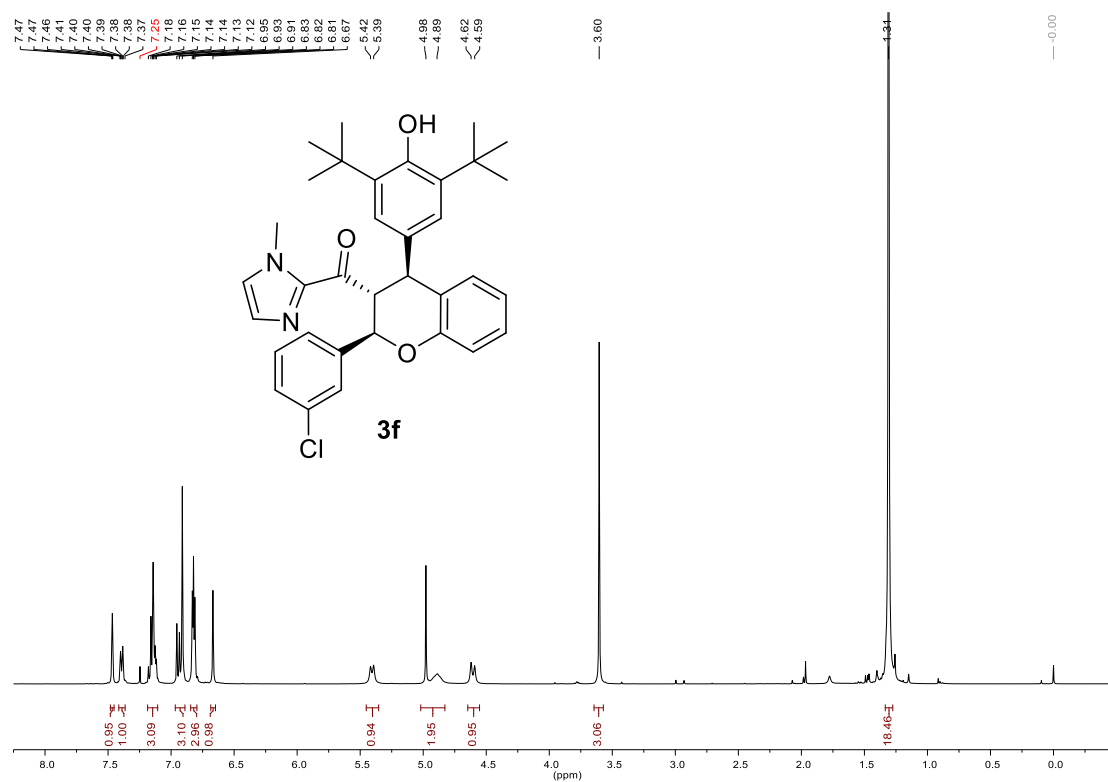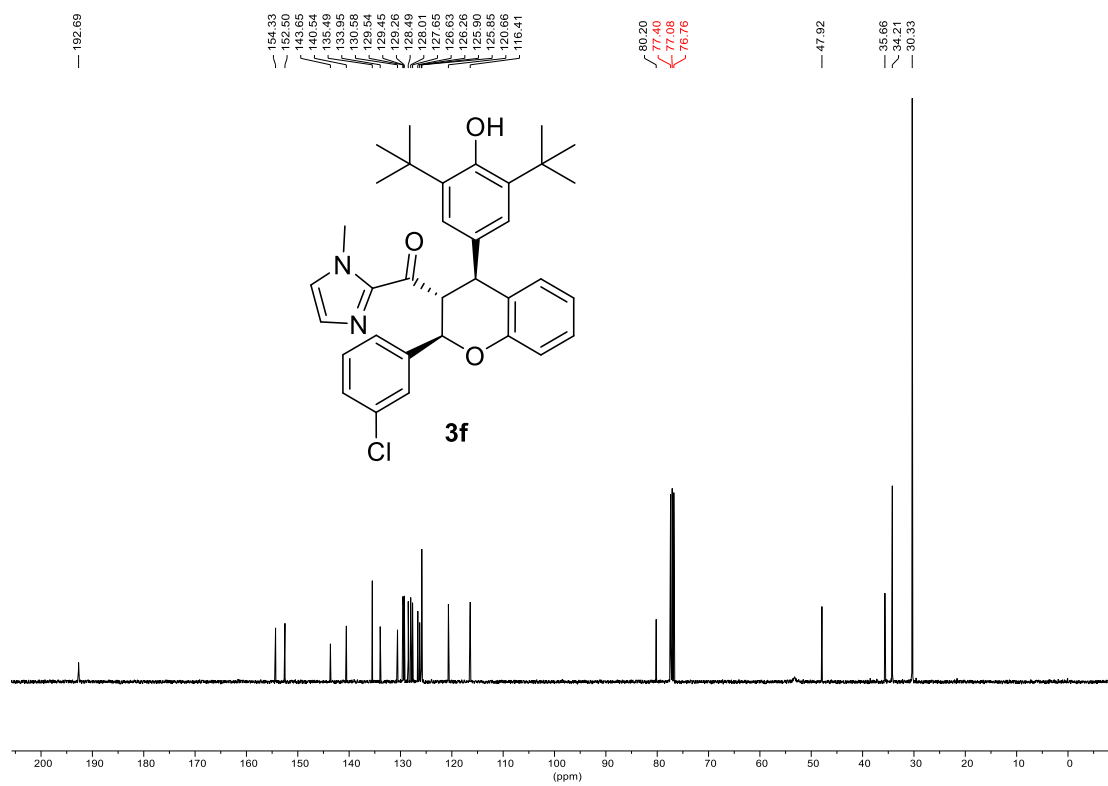

**Figure S6.** <sup>1</sup>H and <sup>13</sup>C NMR spectrum of **3f**.

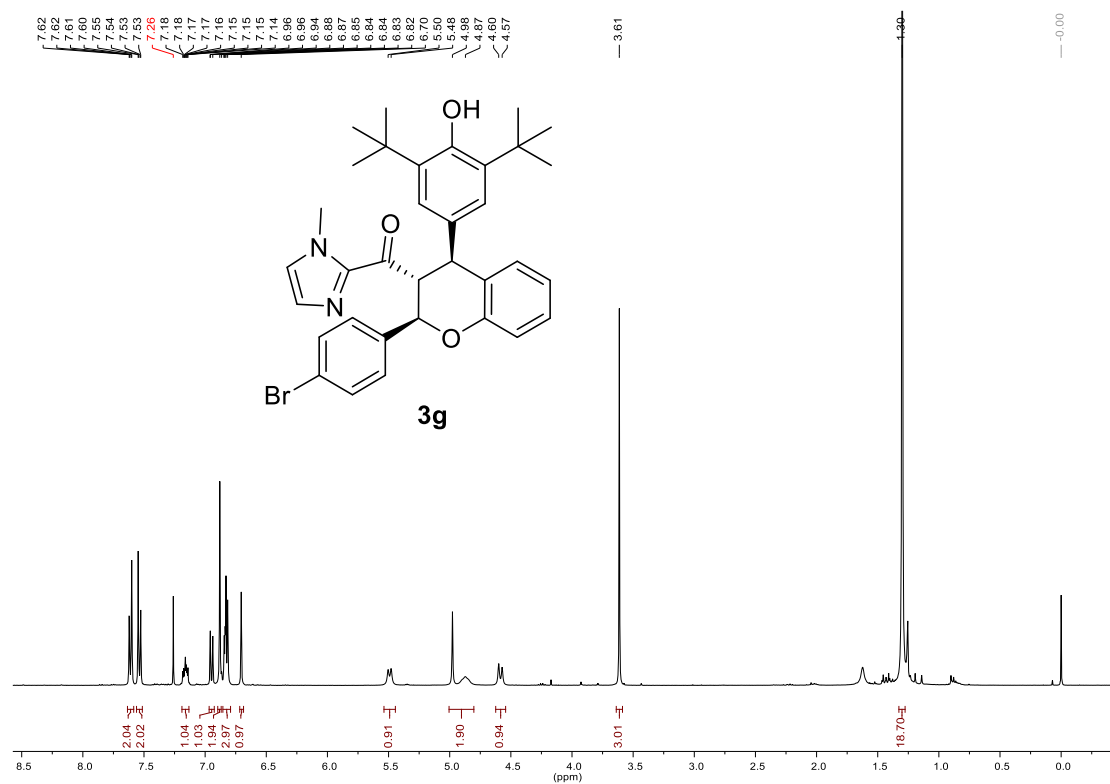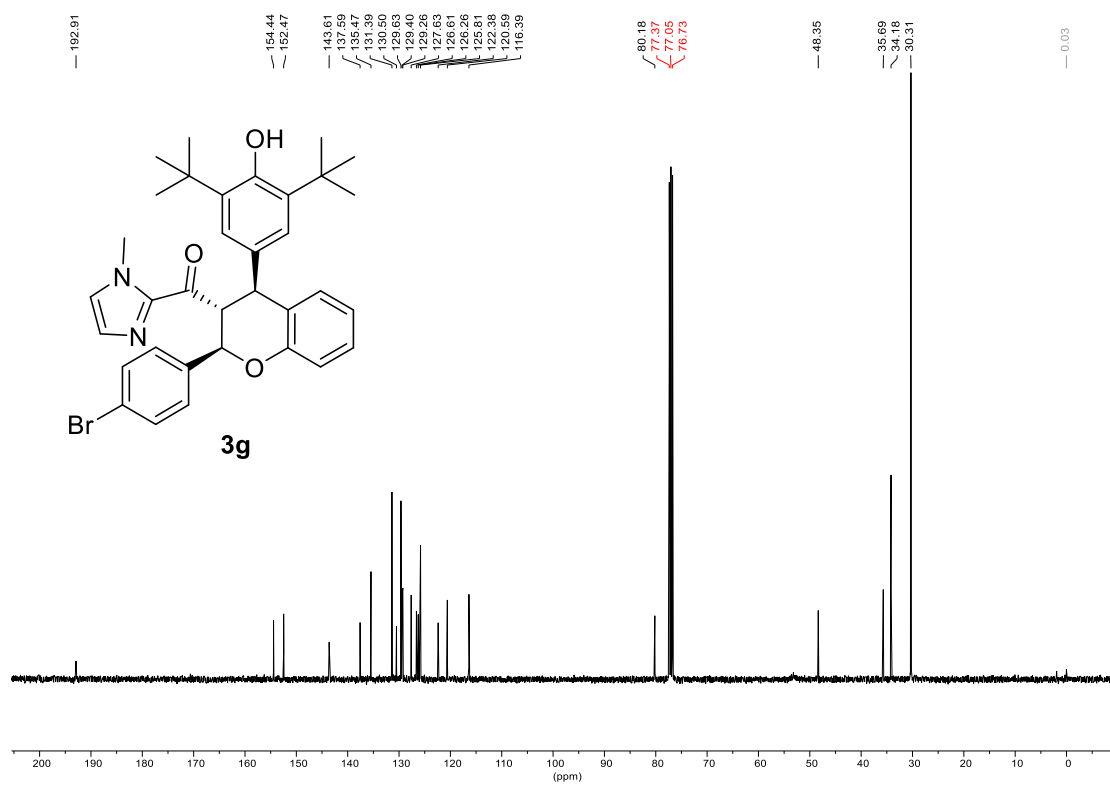

Figure S7. <sup>1</sup>H and <sup>13</sup>C NMR spectrum of **3g**.

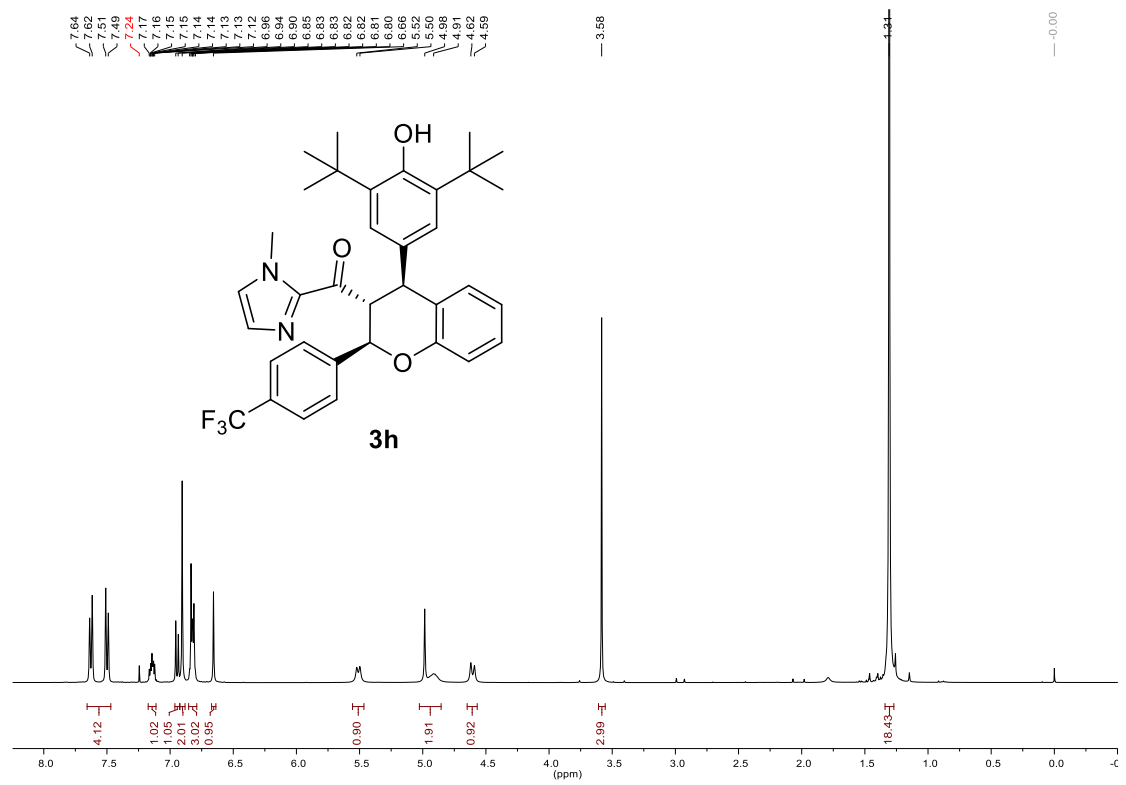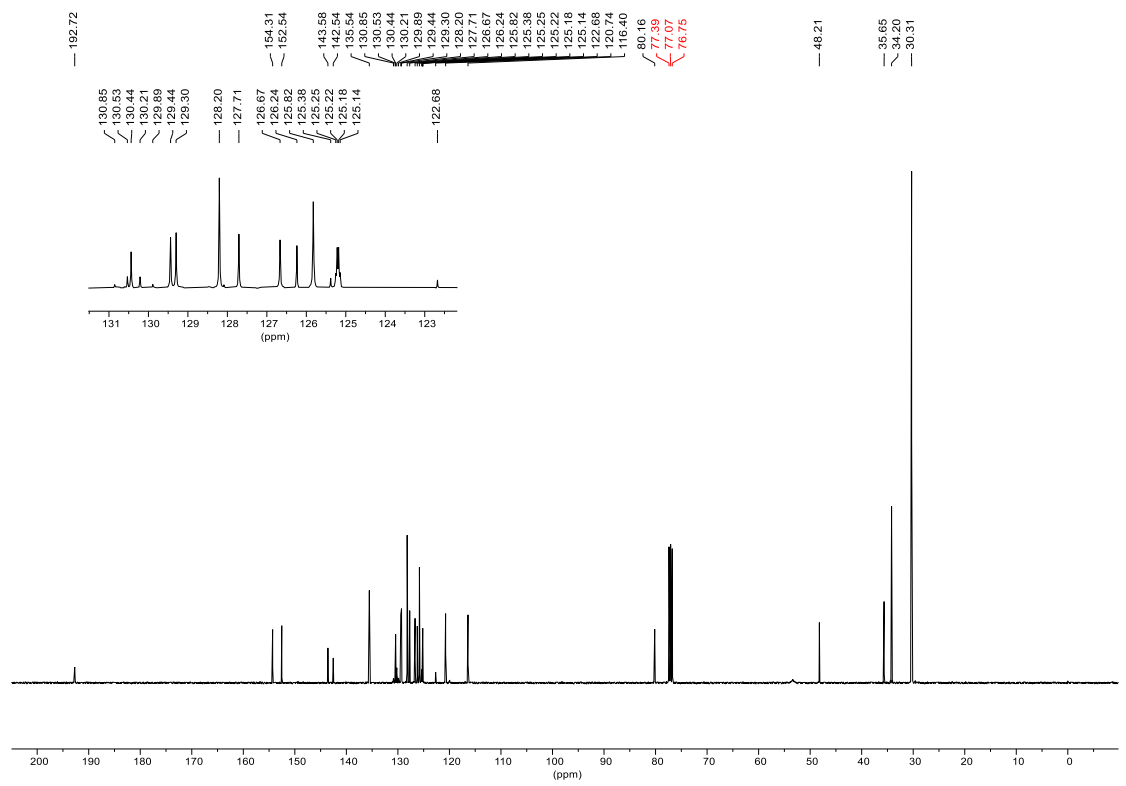

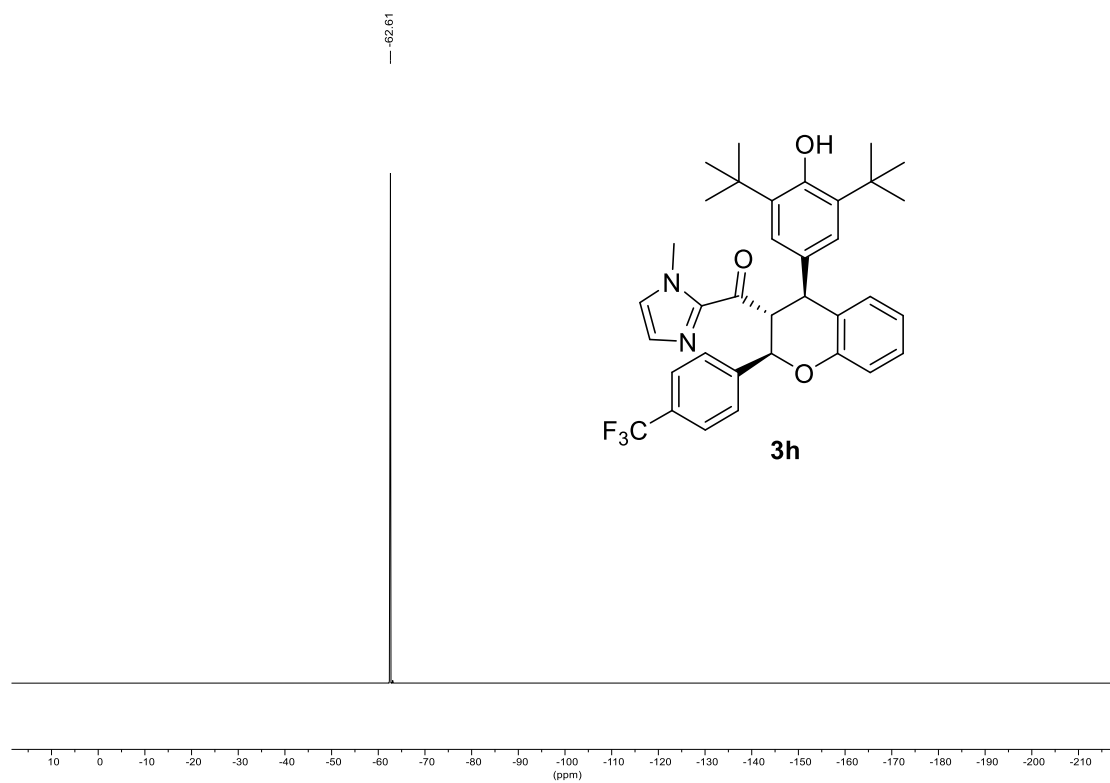

**Figure S8.**  $^1\text{H}$ ,  $^{13}\text{C}$  and  $^{19}\text{F}$  NMR spectrum of **3h**.

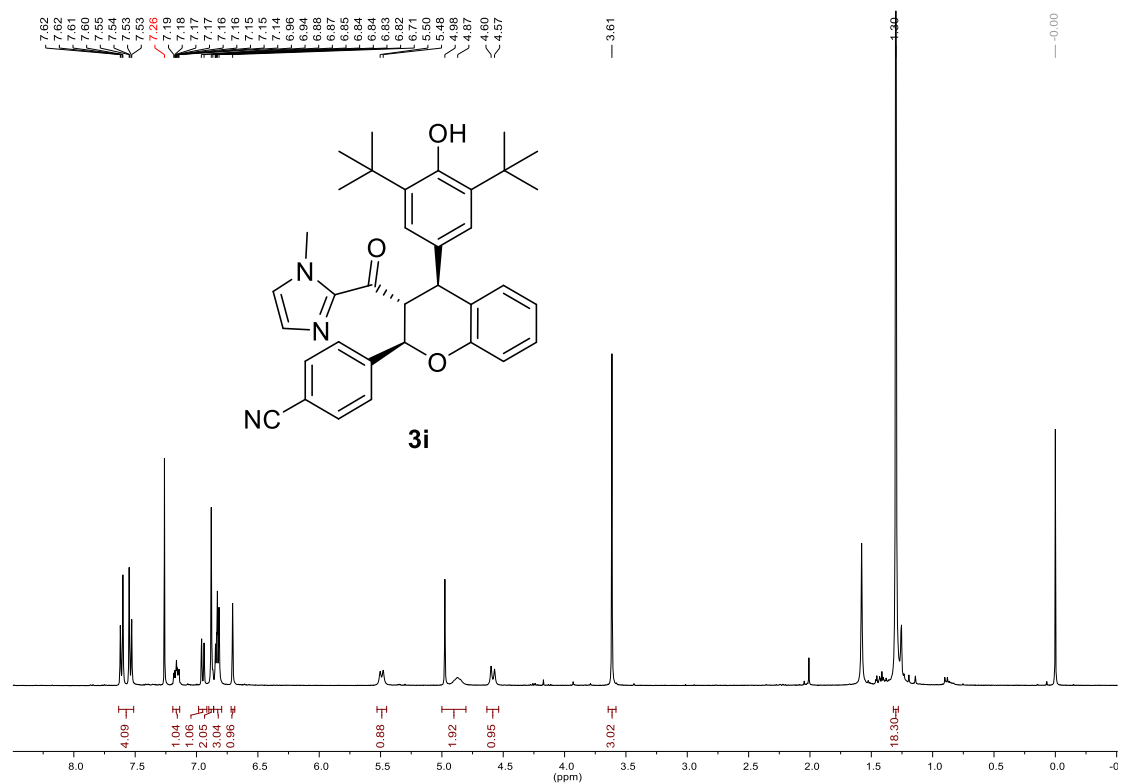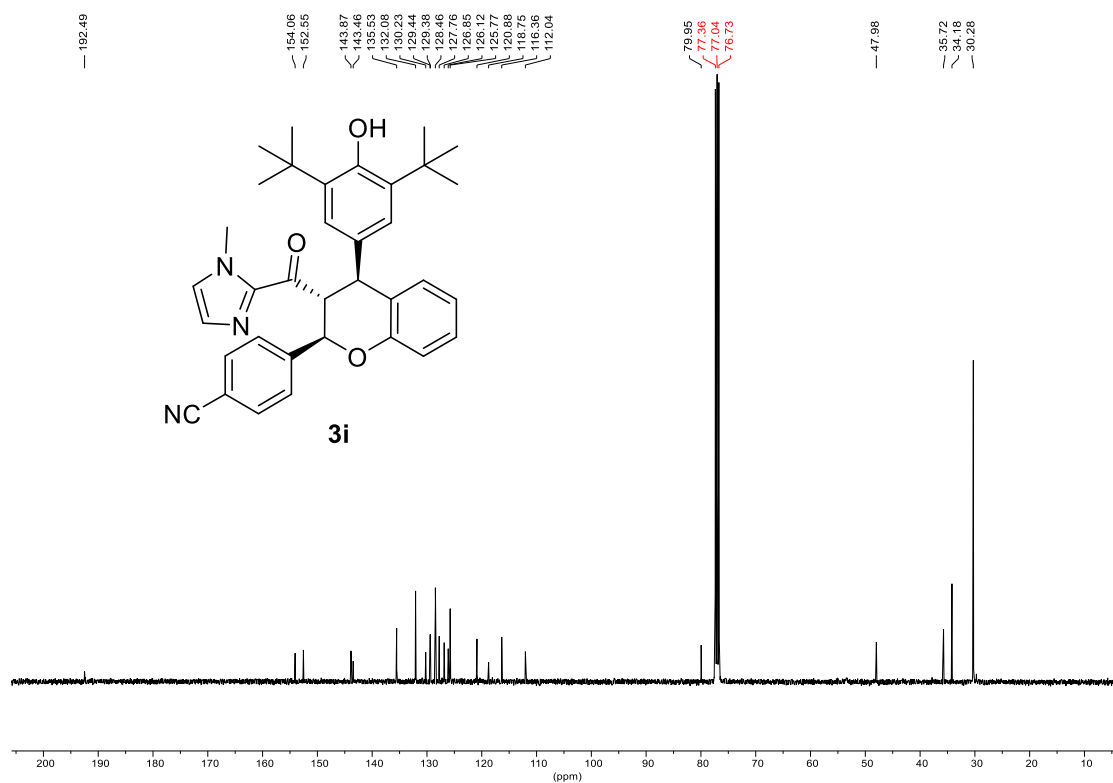

Figure S9. <sup>1</sup>H and <sup>13</sup>C NMR spectrum of 3i.

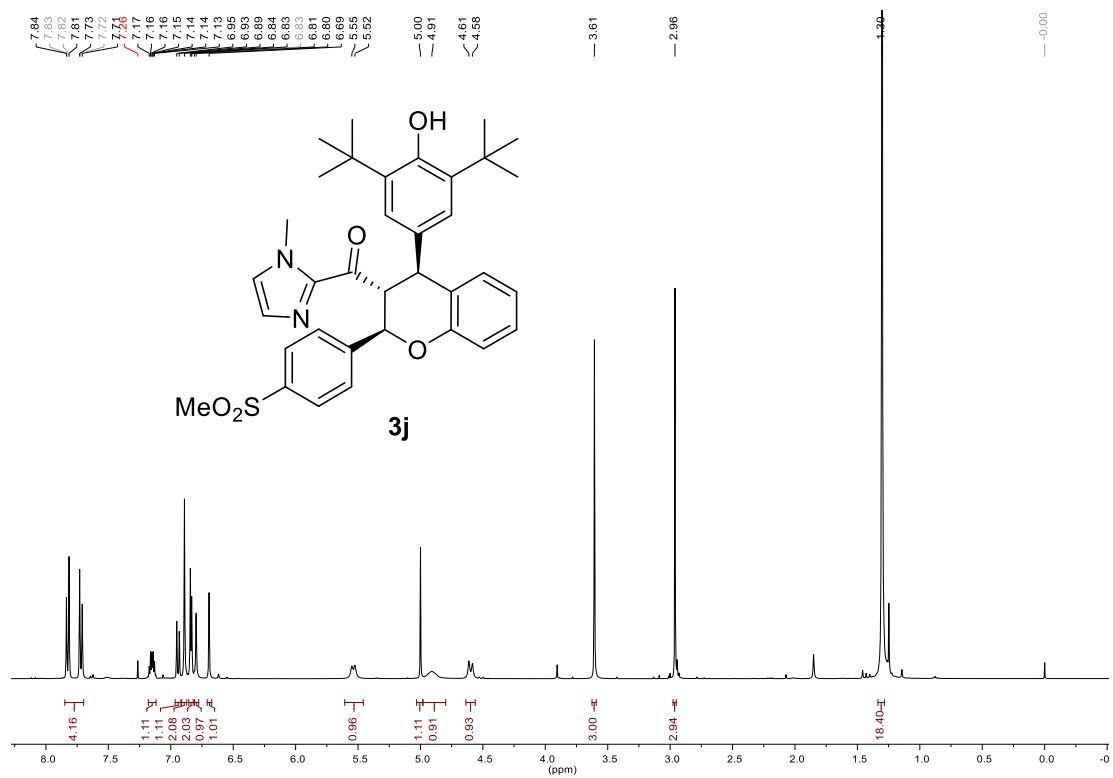



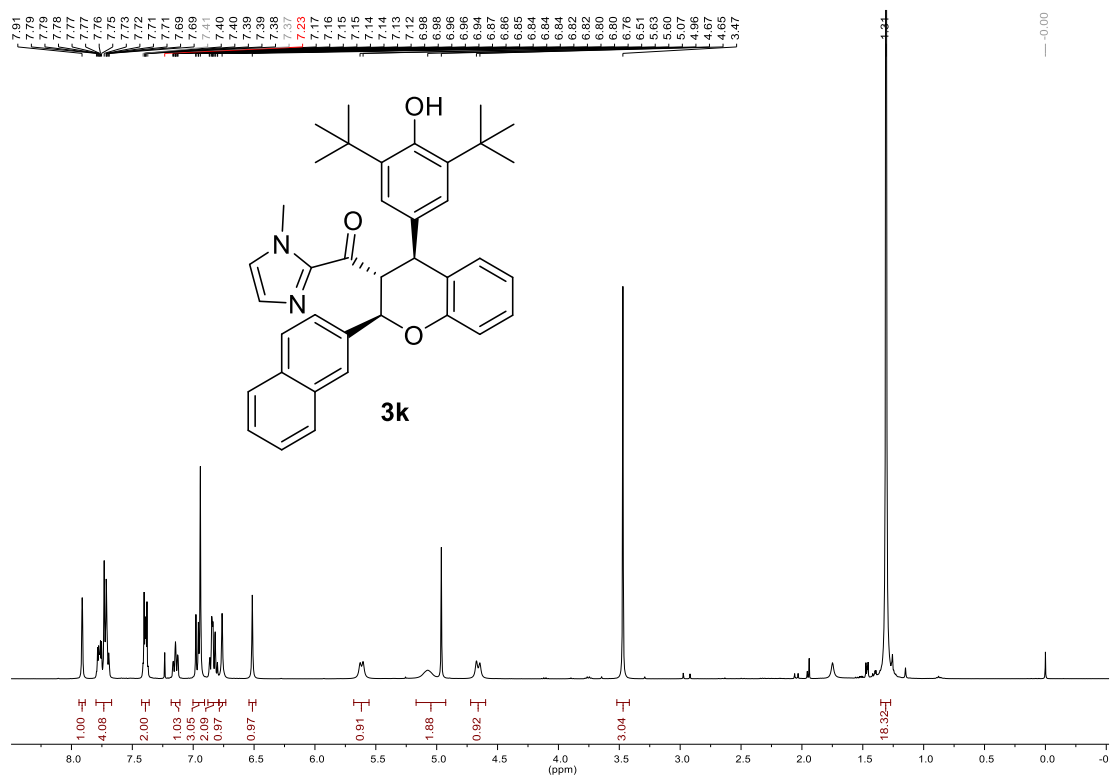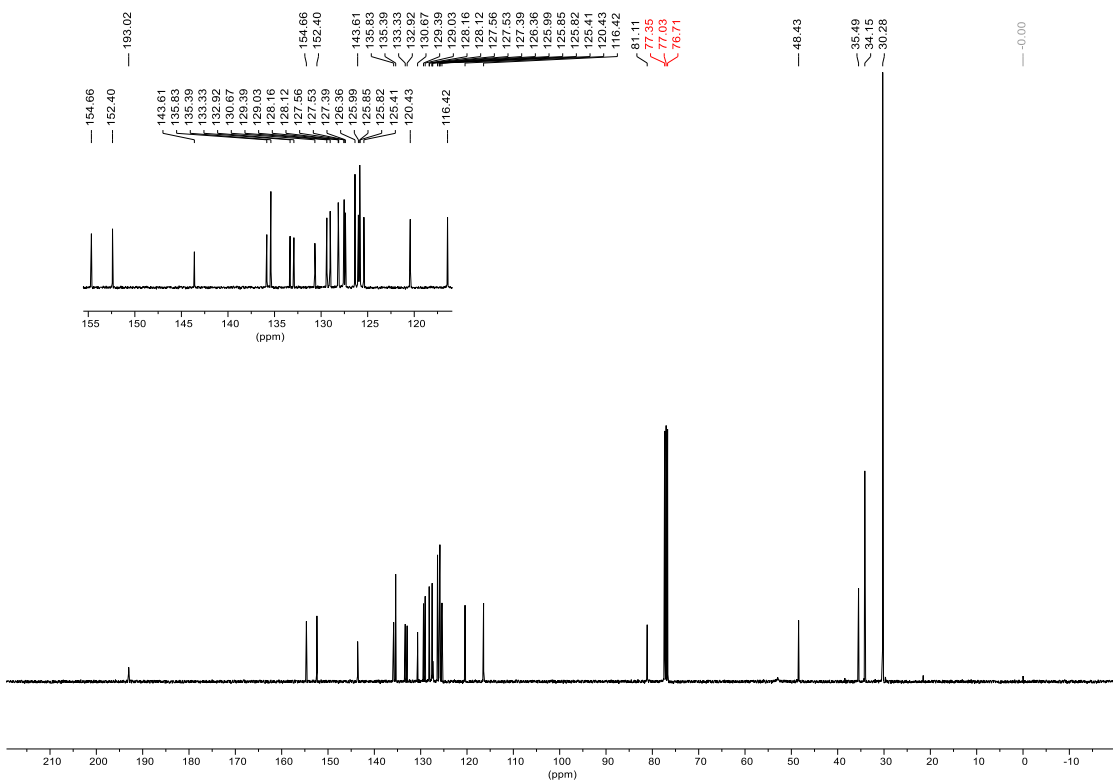

Figure S11. <sup>1</sup>H and <sup>13</sup>C NMR spectrum of 3k.

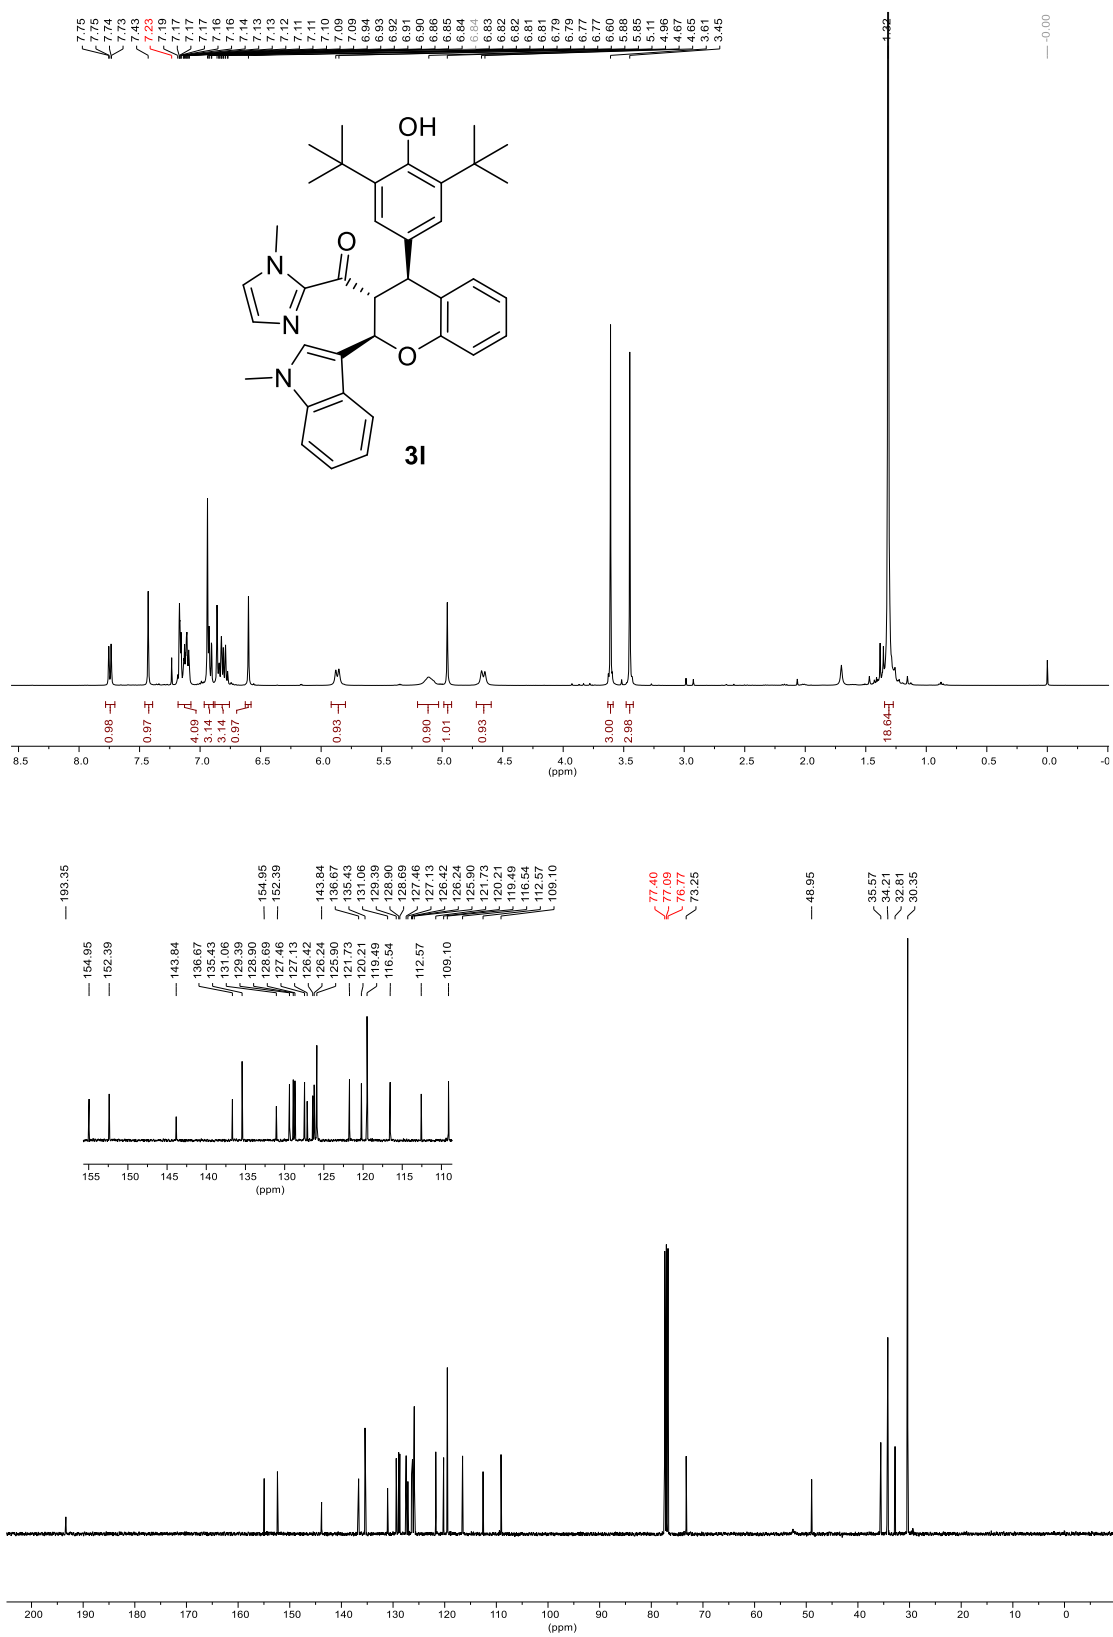

Figure S12. <sup>1</sup>H and <sup>13</sup>C NMR spectrum of 3I.

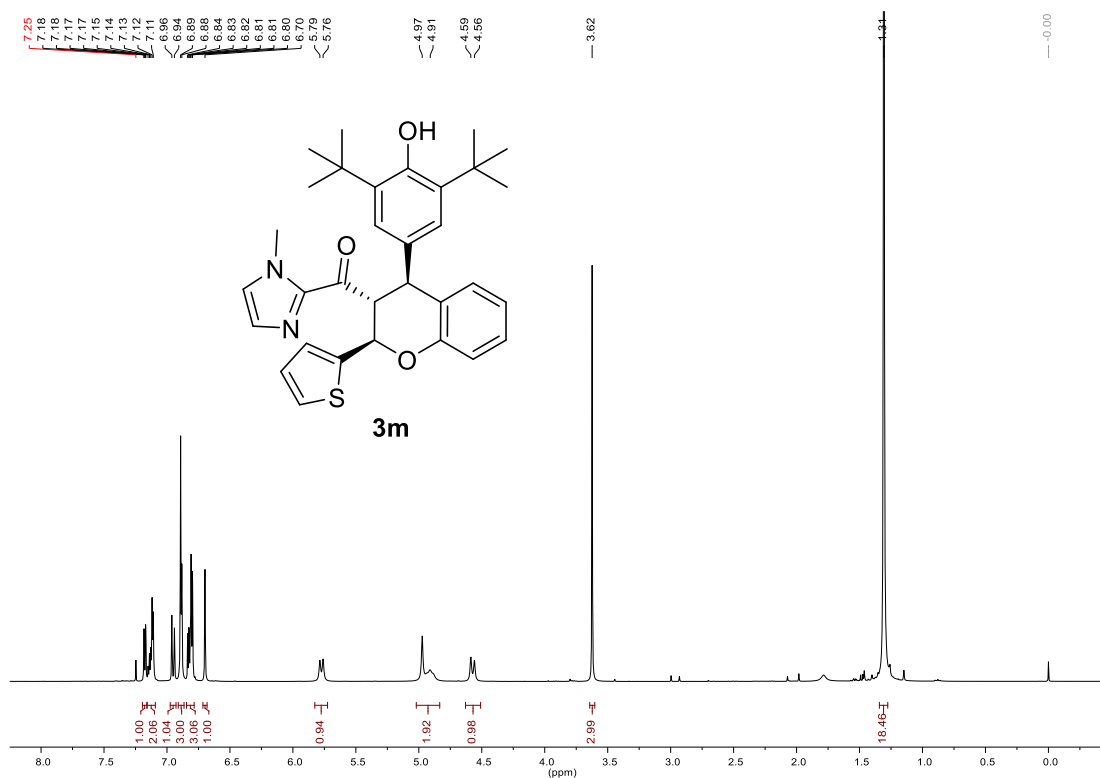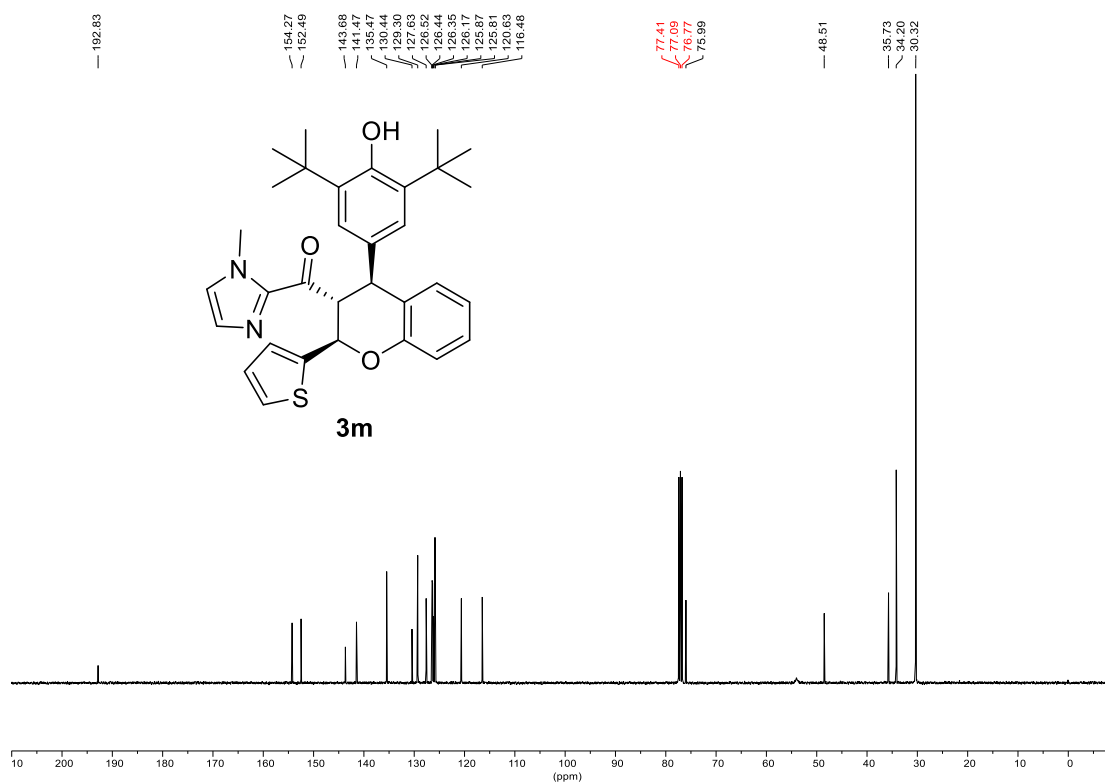

**Figure S13.** <sup>1</sup>H and <sup>13</sup>C NMR spectrum of **3m**.

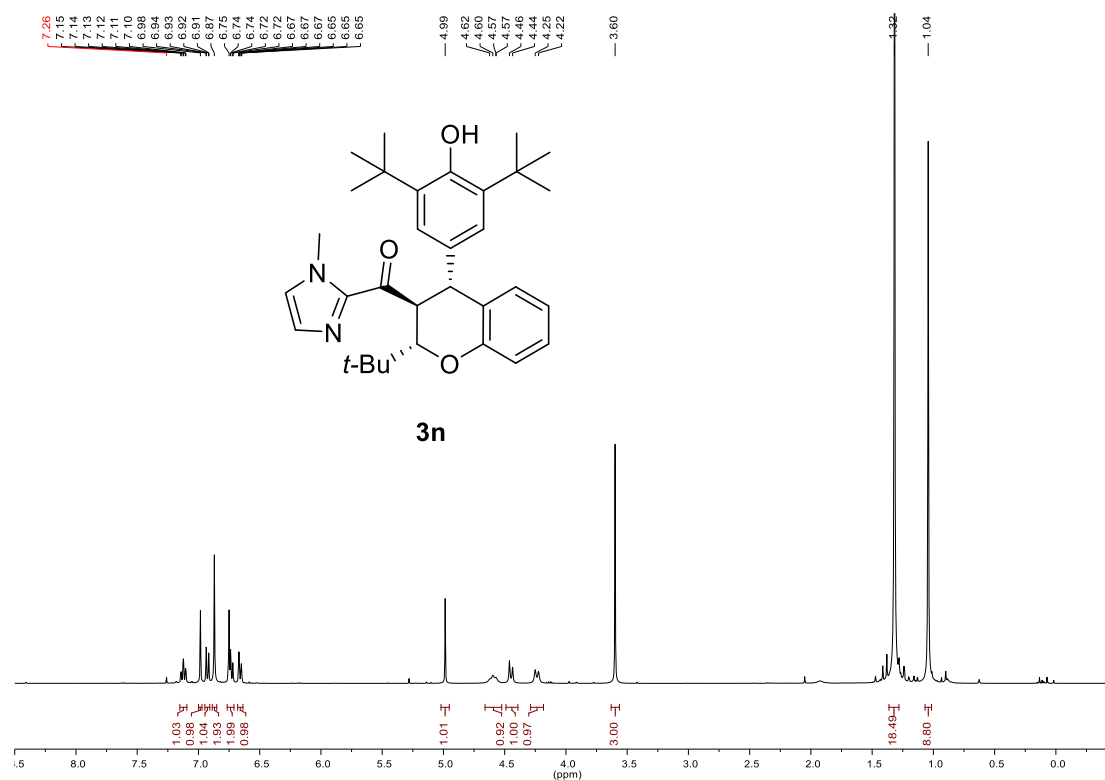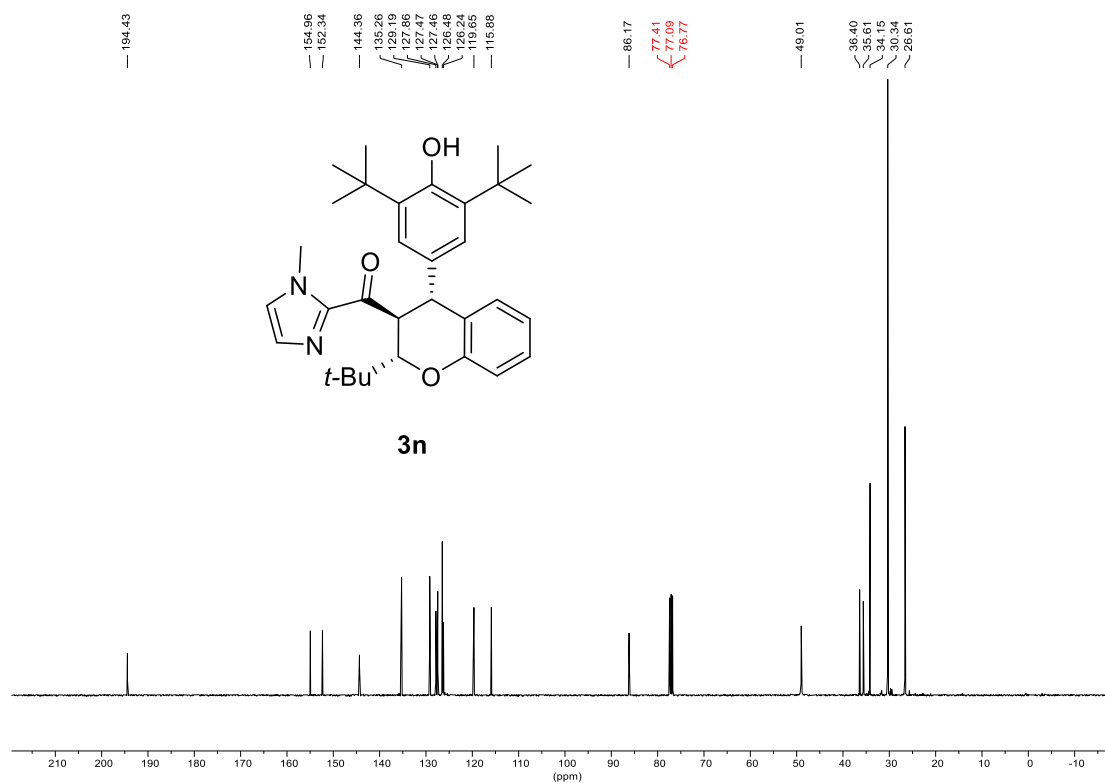

**Figure S14.** <sup>1</sup>H and <sup>13</sup>C NMR spectrum of **3n**.

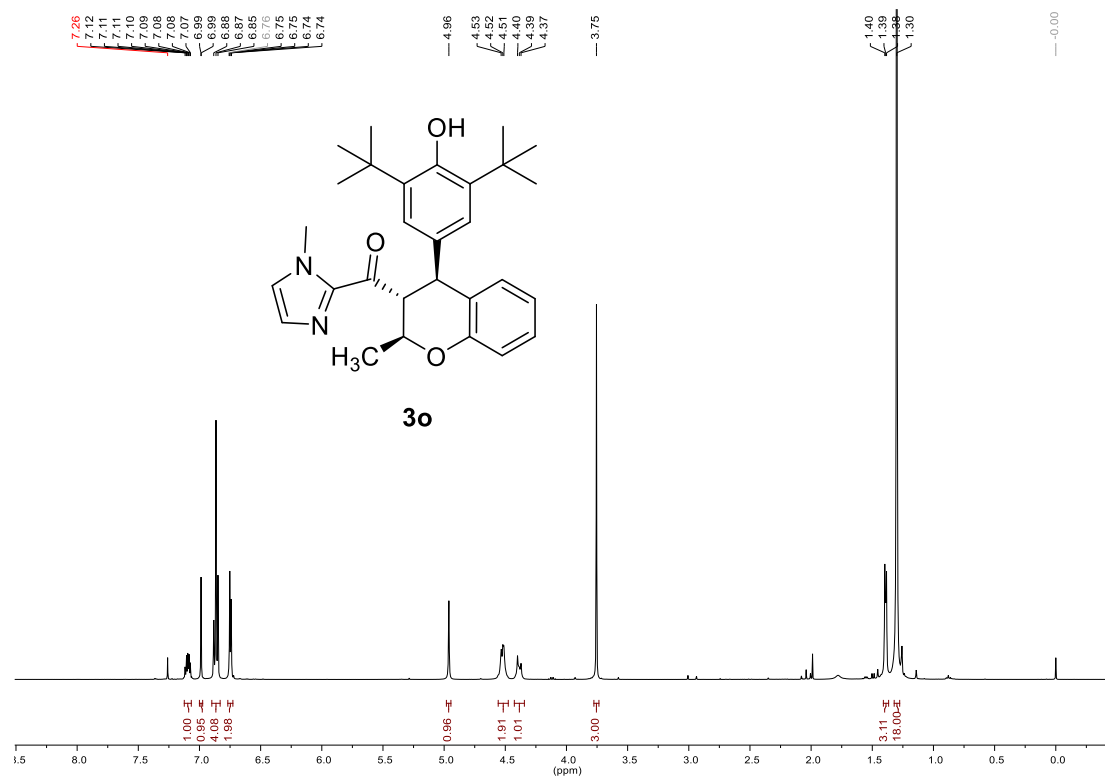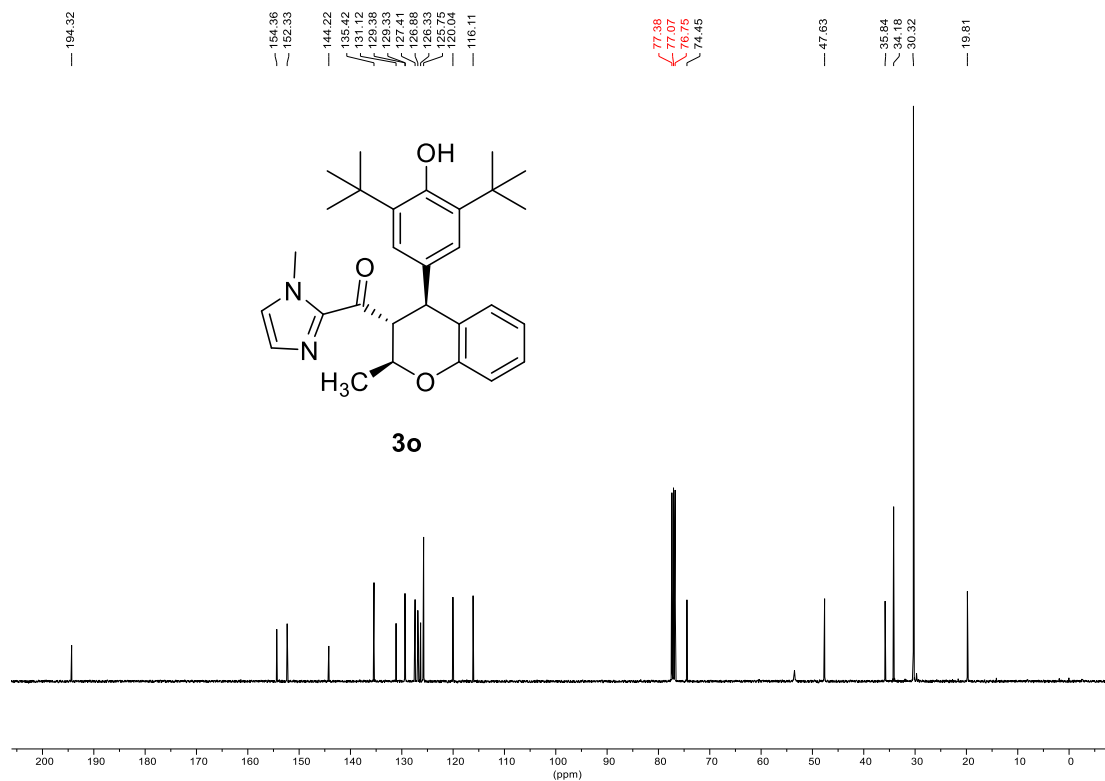

**Figure S15.** <sup>1</sup>H and <sup>13</sup>C NMR spectrum of **3o**.

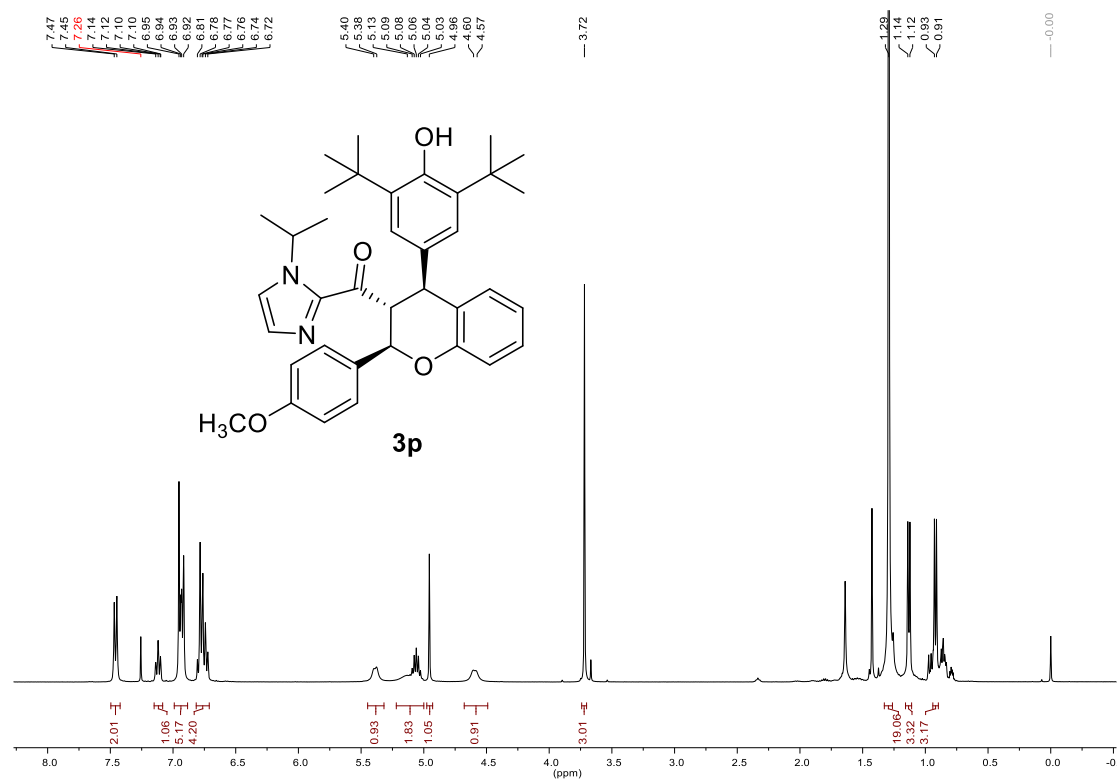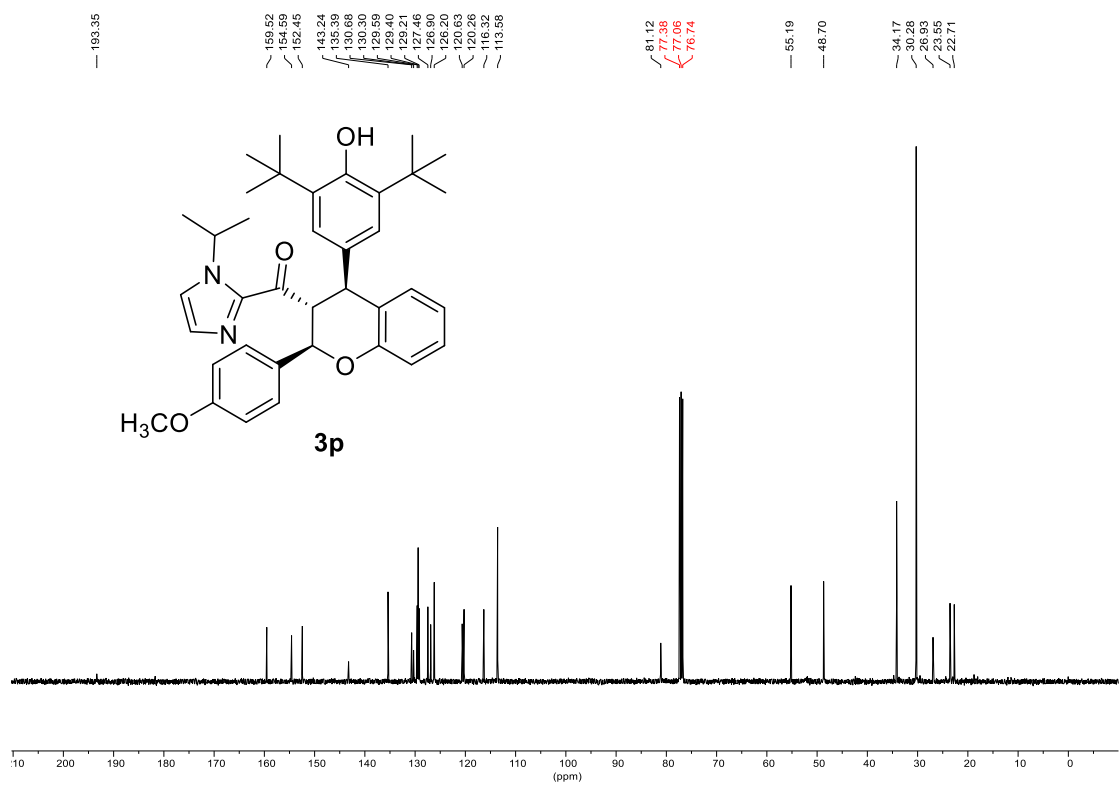

**Figure S16.** <sup>1</sup>H and <sup>13</sup>C NMR spectrum of 3p.

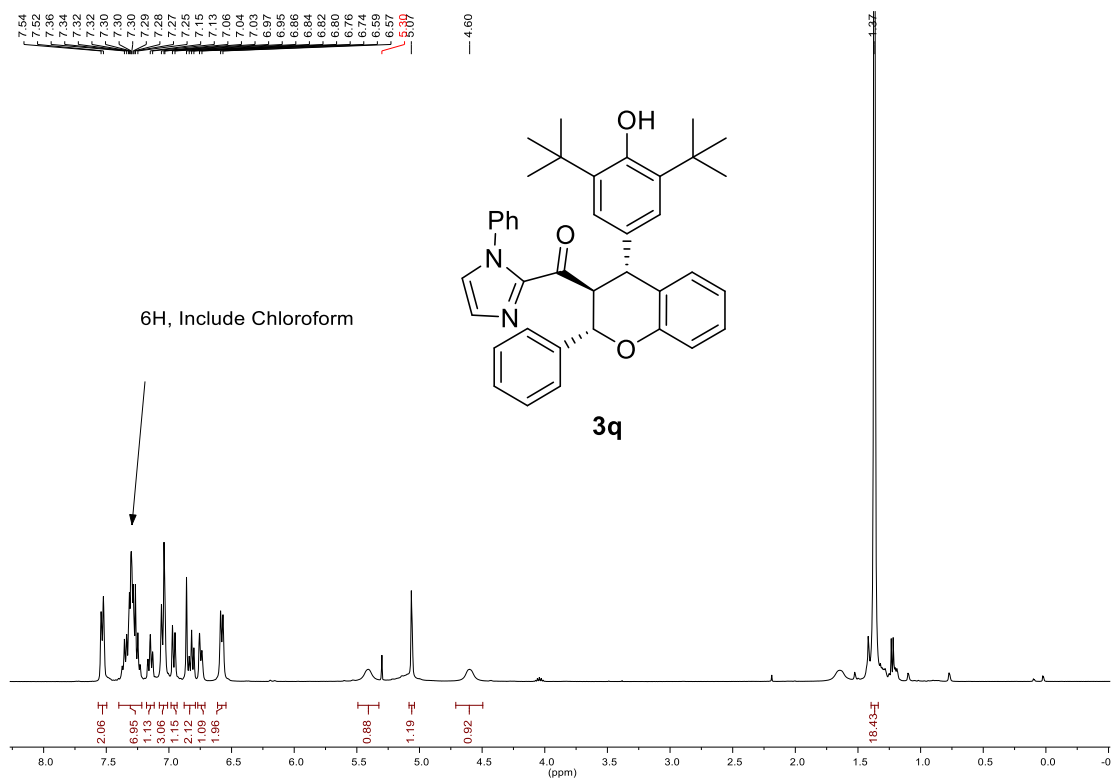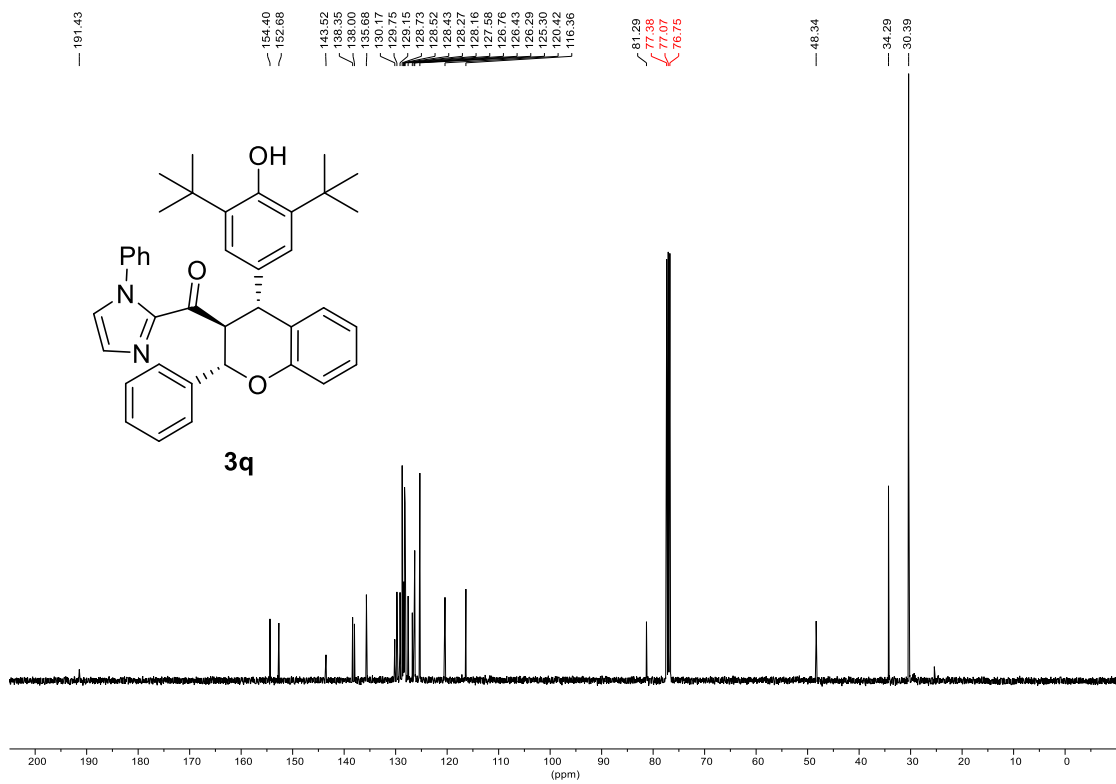

**Figure S17.**  $^1\text{H}$  and  $^{13}\text{C}$  NMR spectrum of **3q**.

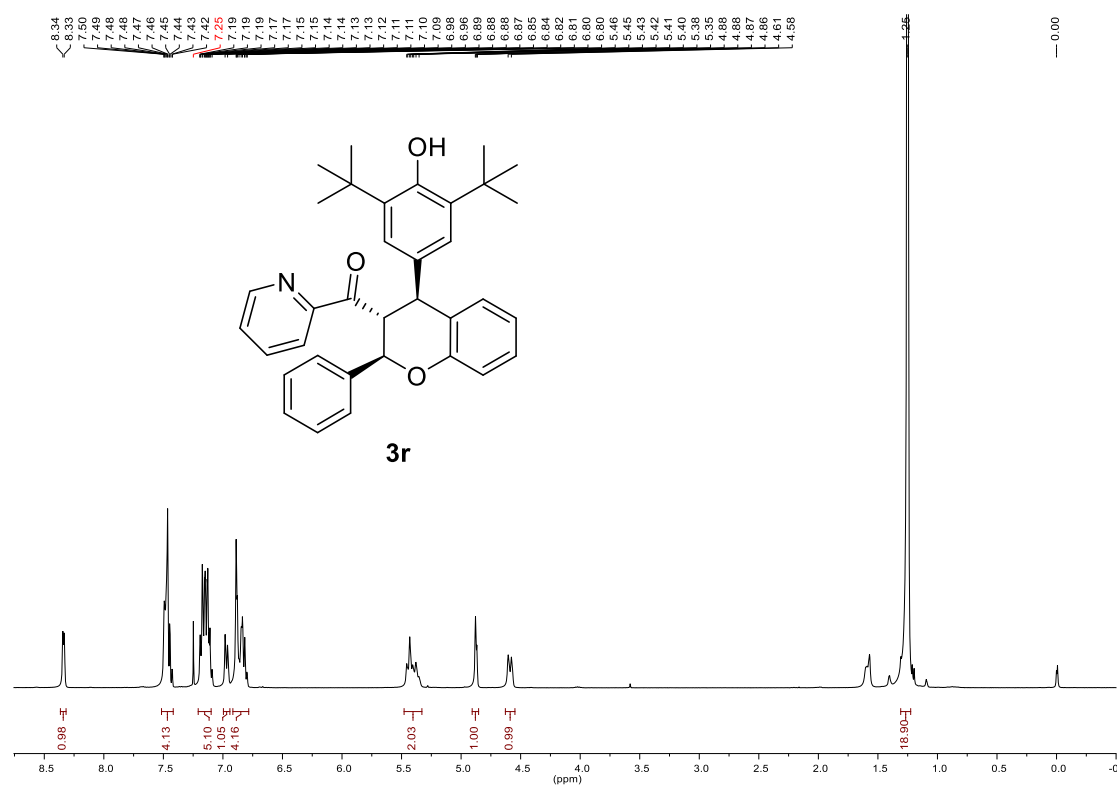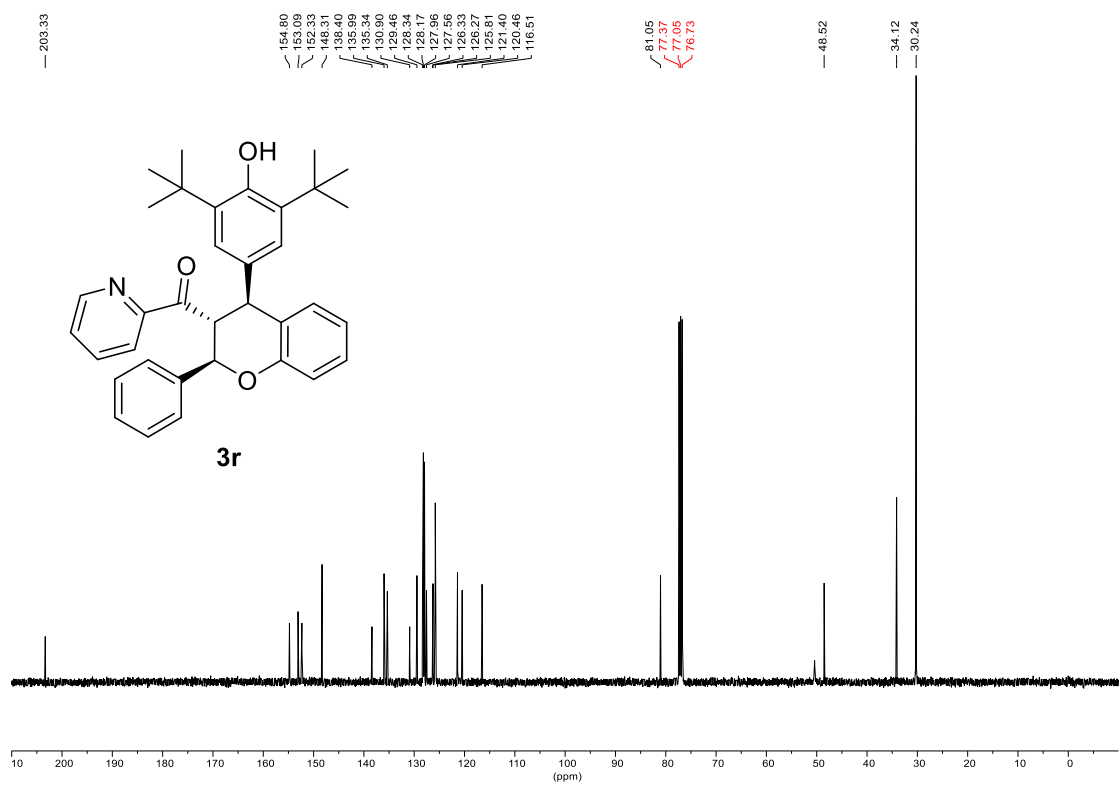

Figure S18. <sup>1</sup>H and <sup>13</sup>C NMR spectrum of 3r.



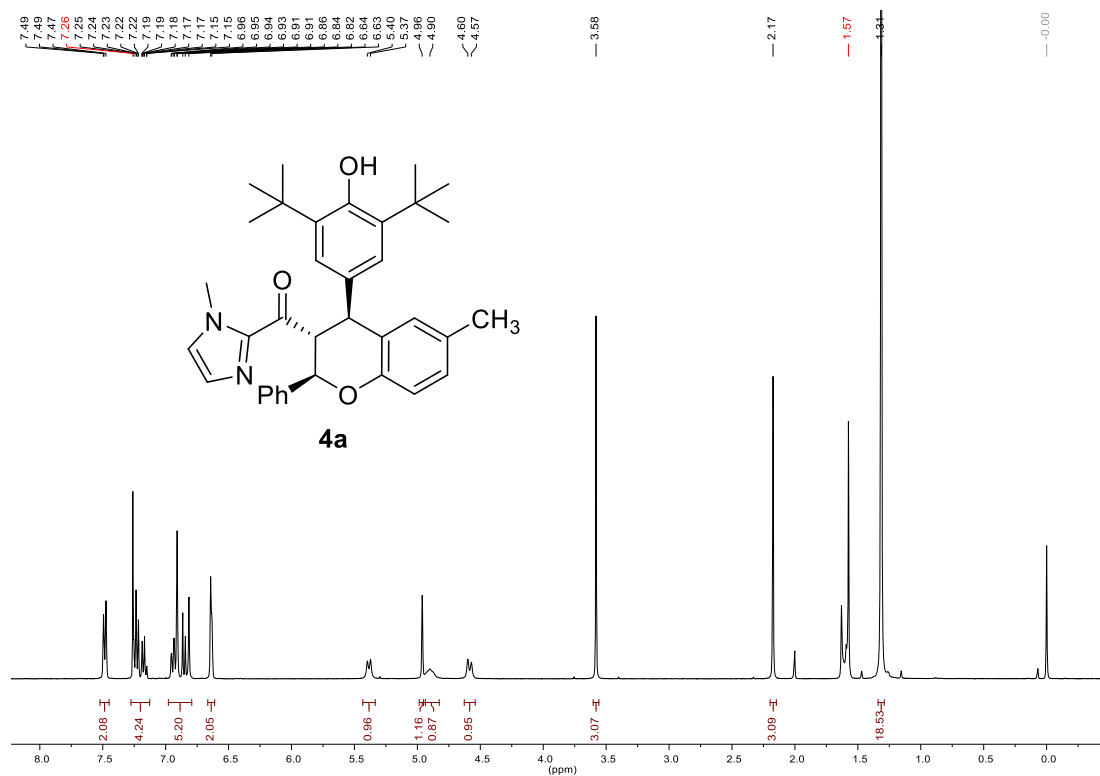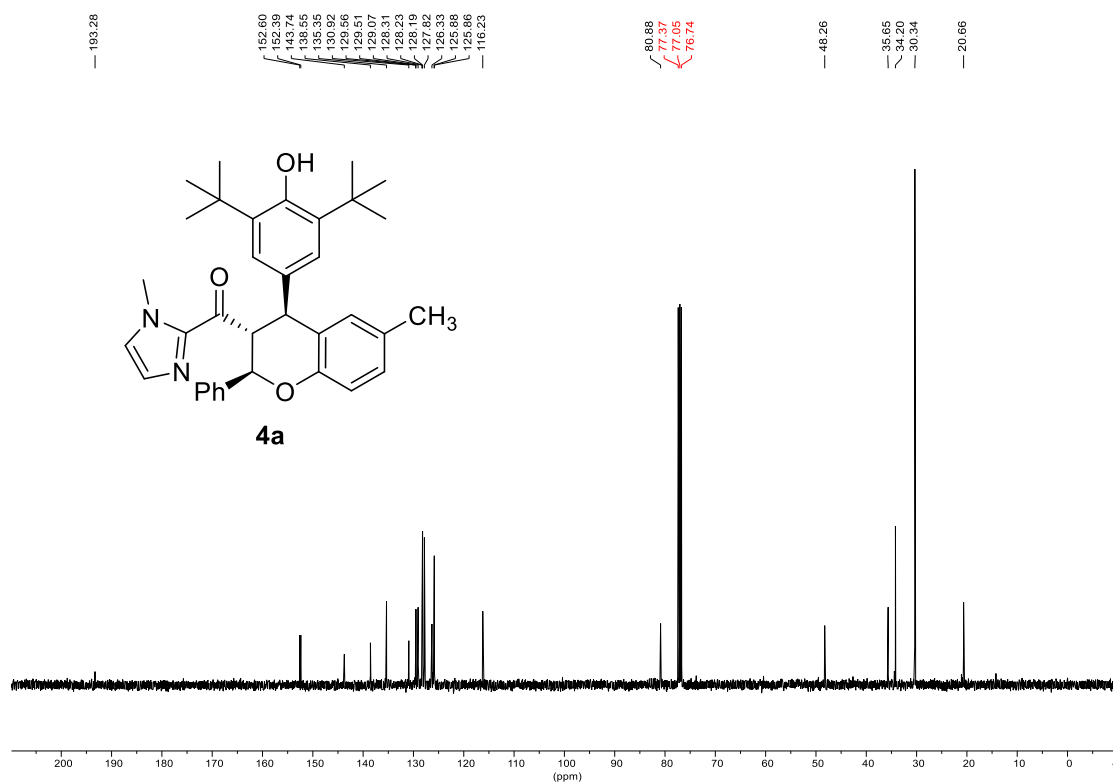

Figure S19.  $^1\text{H}$  and  $^{13}\text{C}$  NMR spectrum of **4a**.

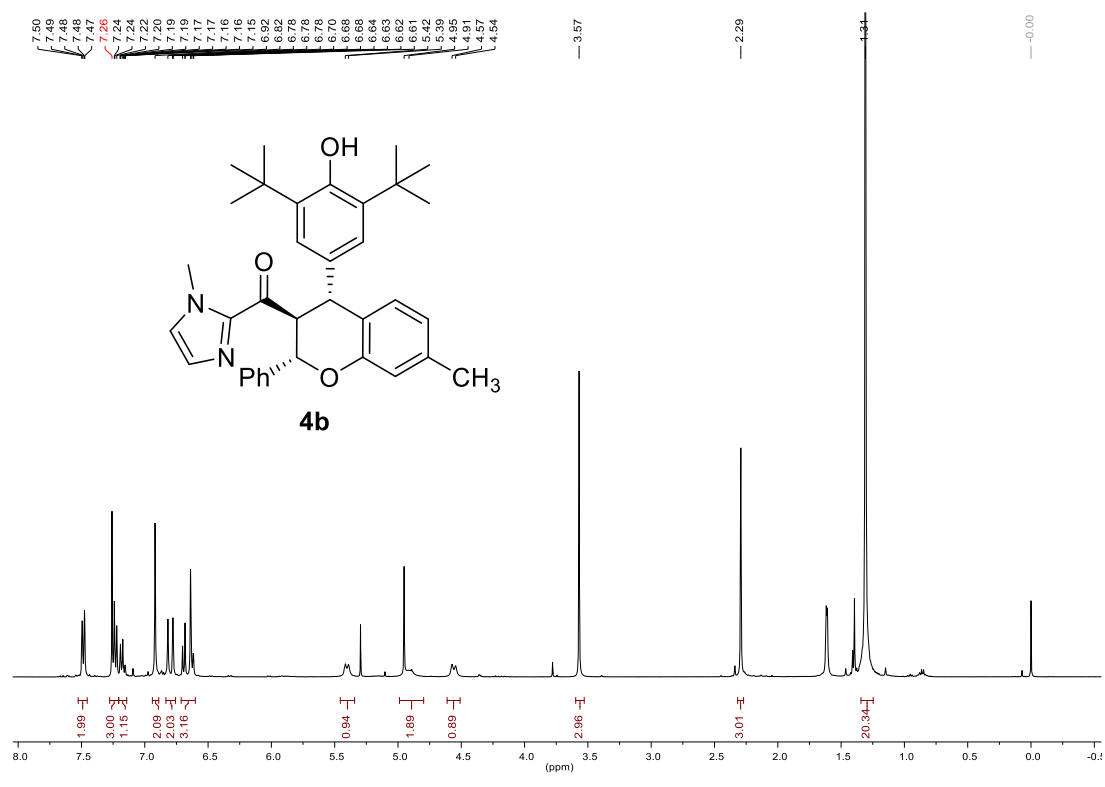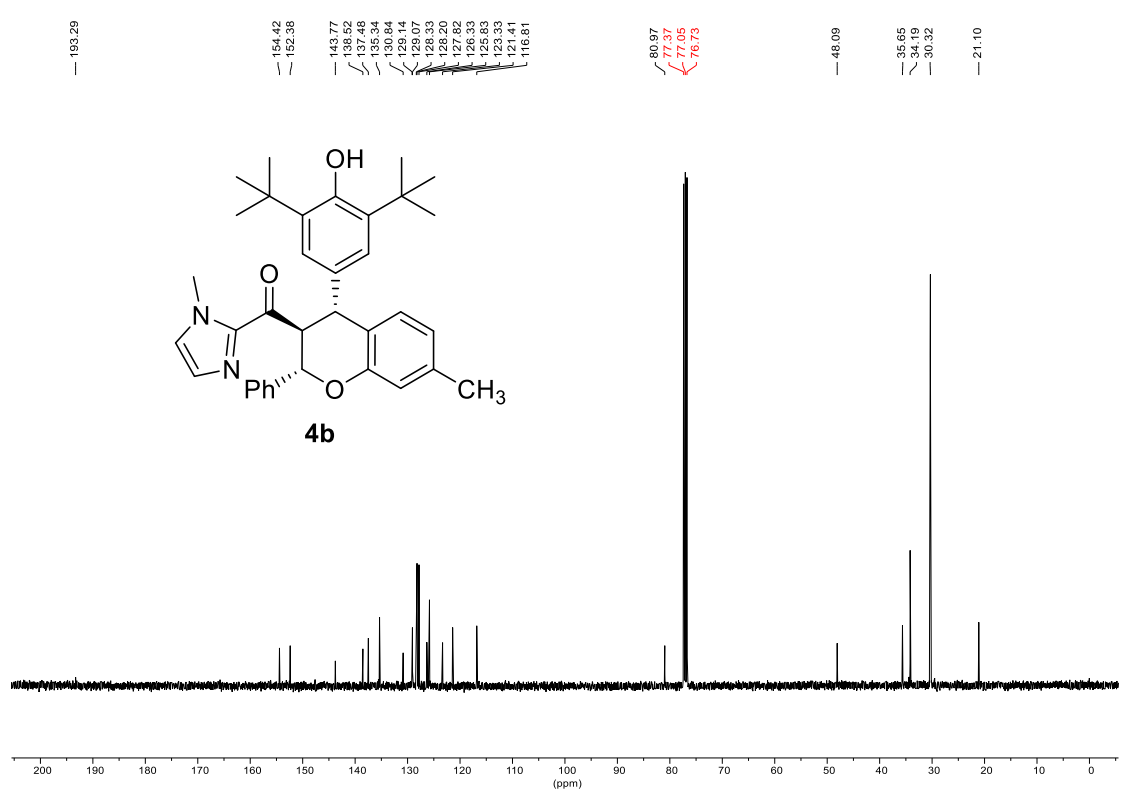

Figure S20. <sup>1</sup>H and <sup>13</sup>C NMR spectrum of **4b**.

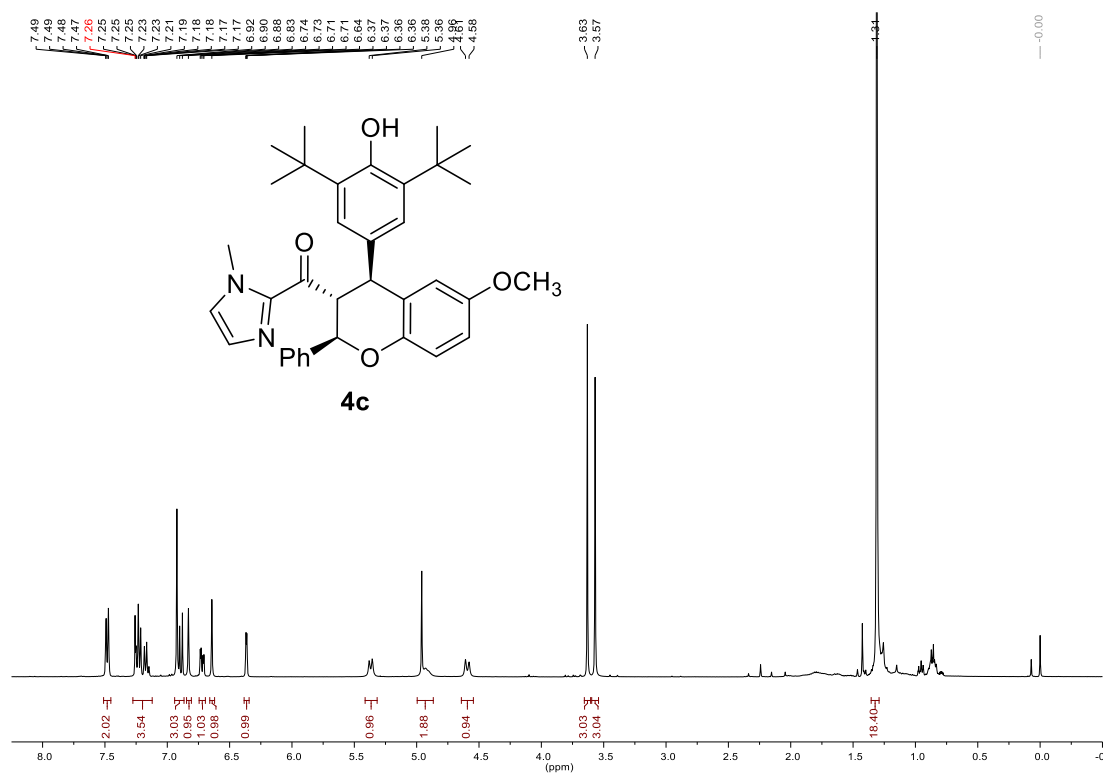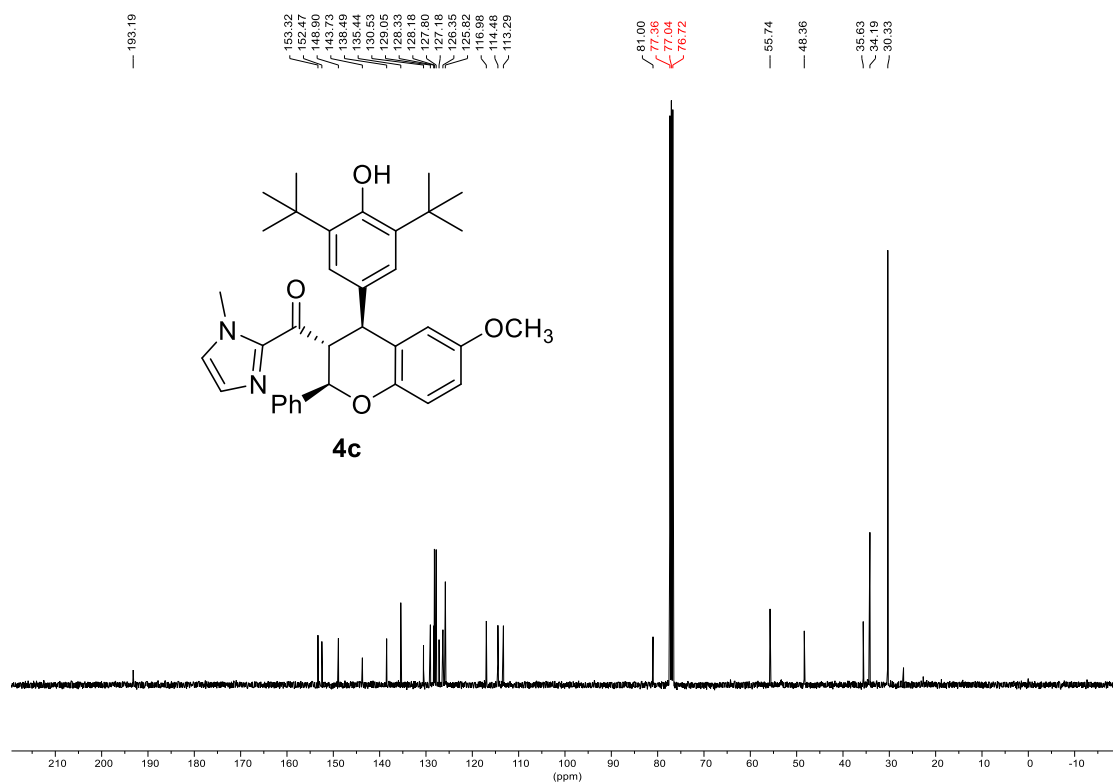

Figure S21. <sup>1</sup>H and <sup>13</sup>C NMR spectrum of **4c**.

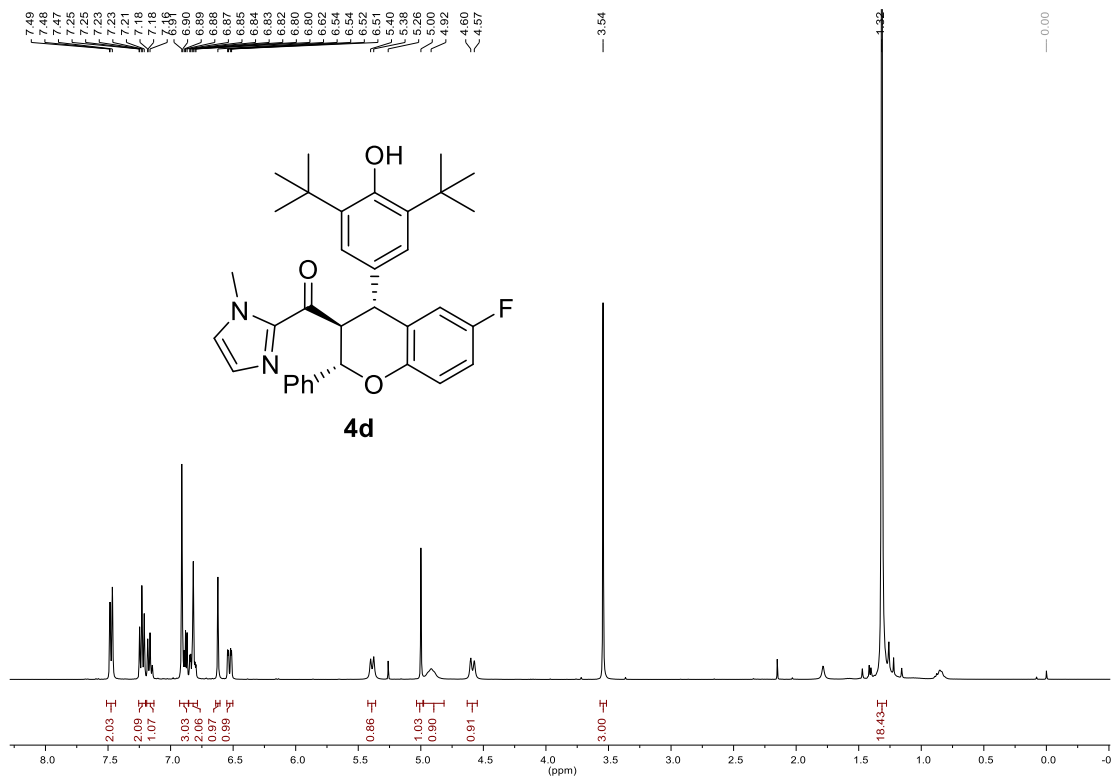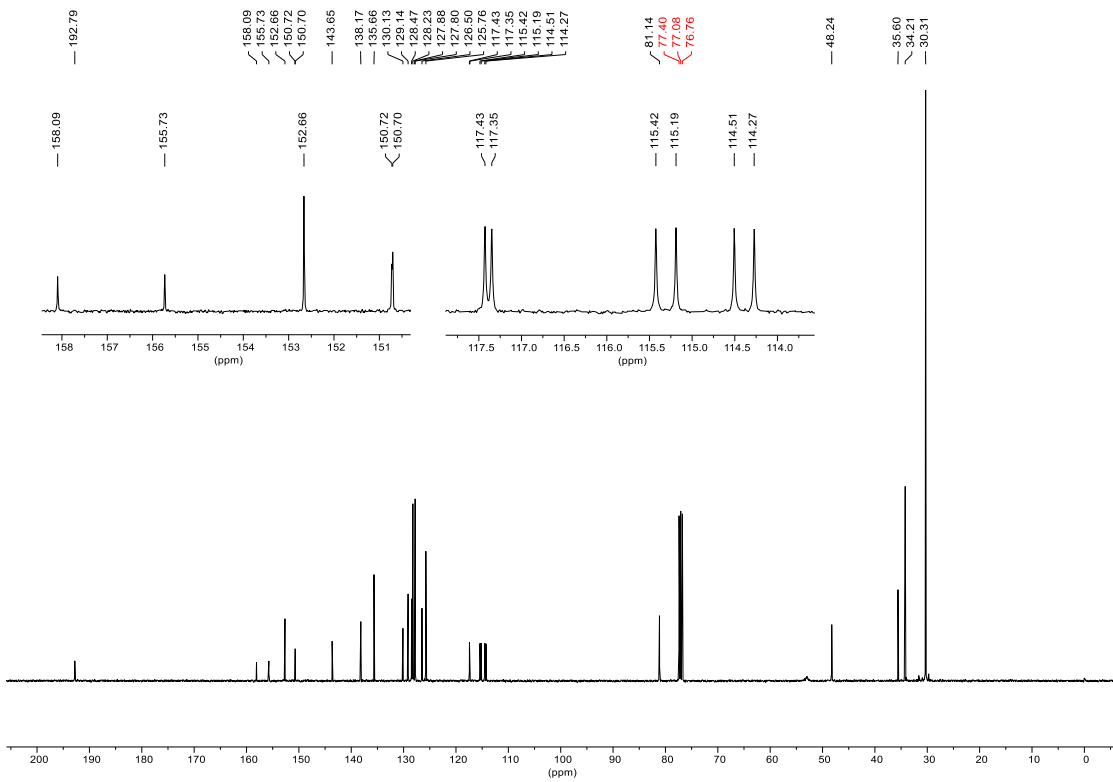

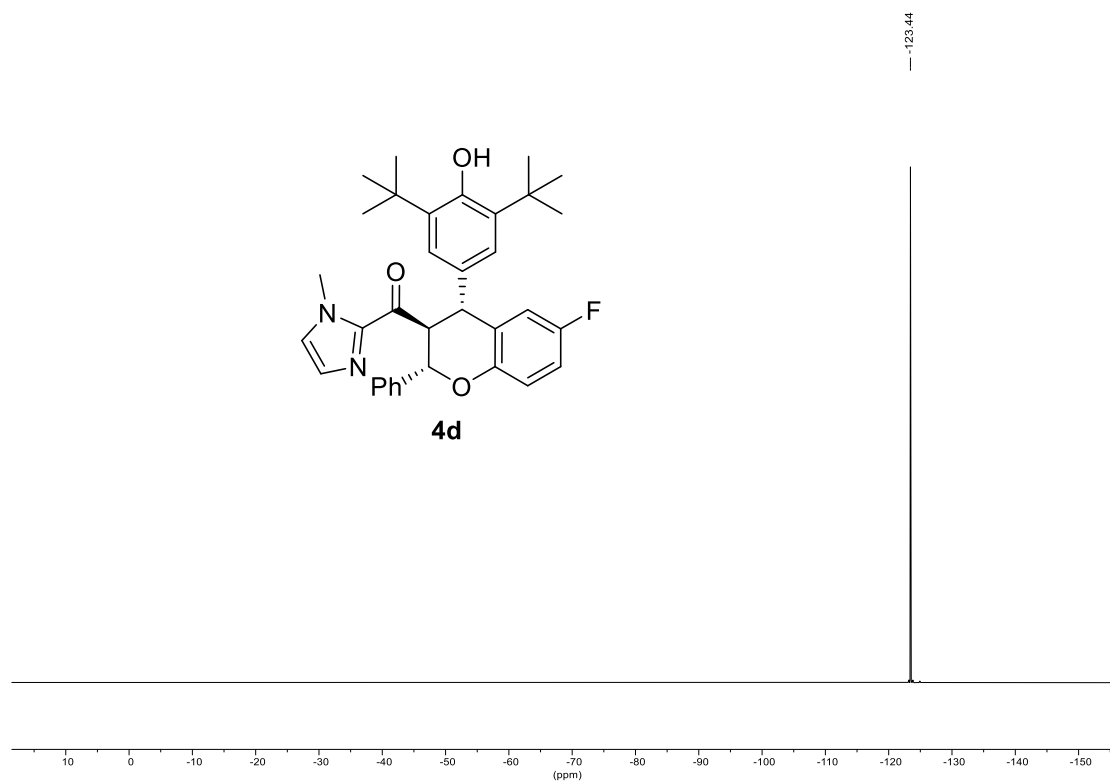

**Figure S22.**  $^1\text{H}$ ,  $^{13}\text{C}$  and  $^{19}\text{F}$  NMR spectrum of **4d**.

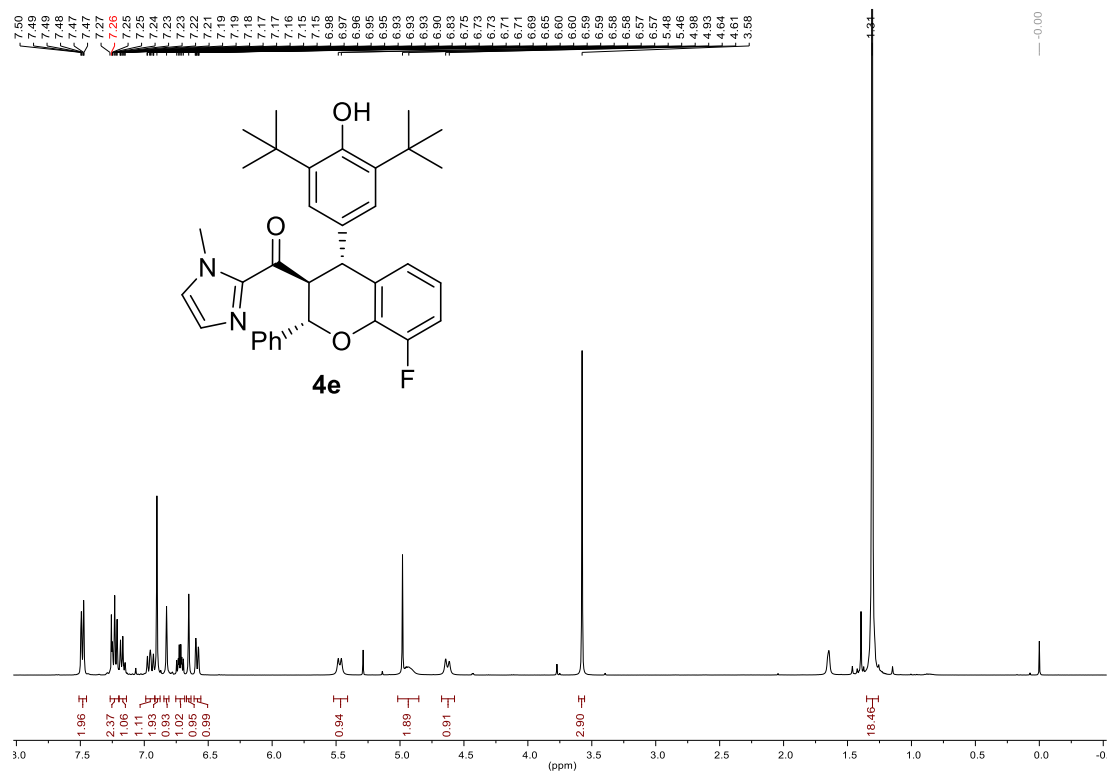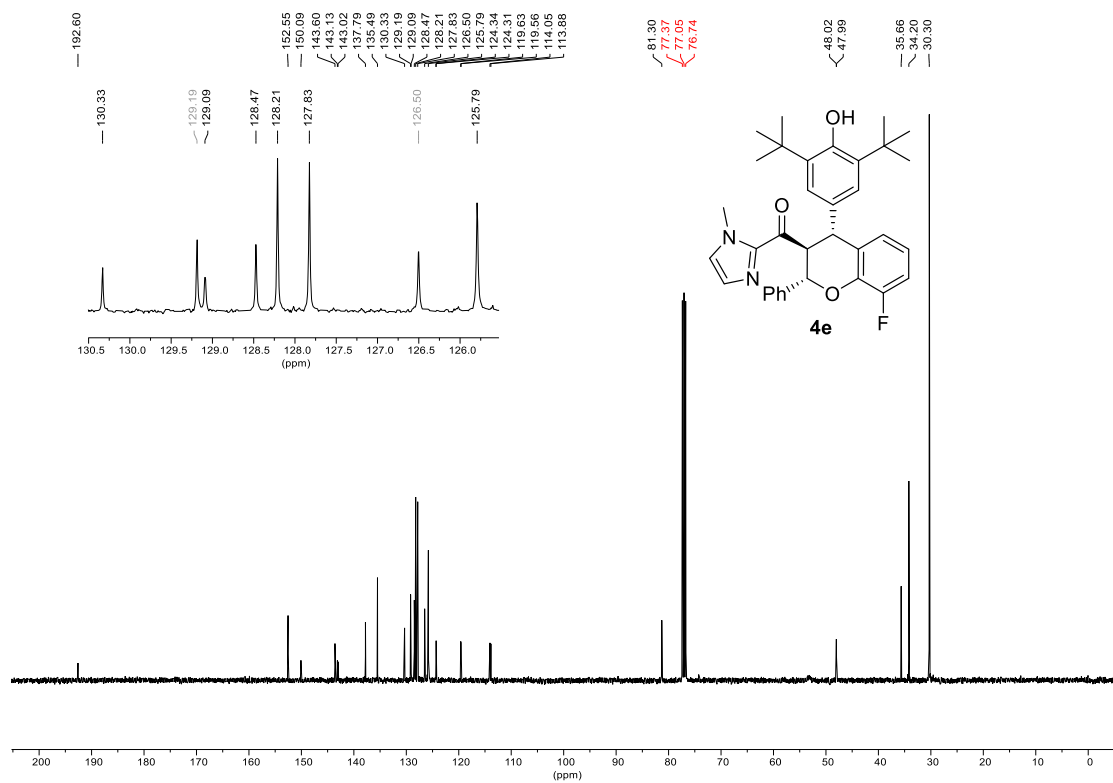

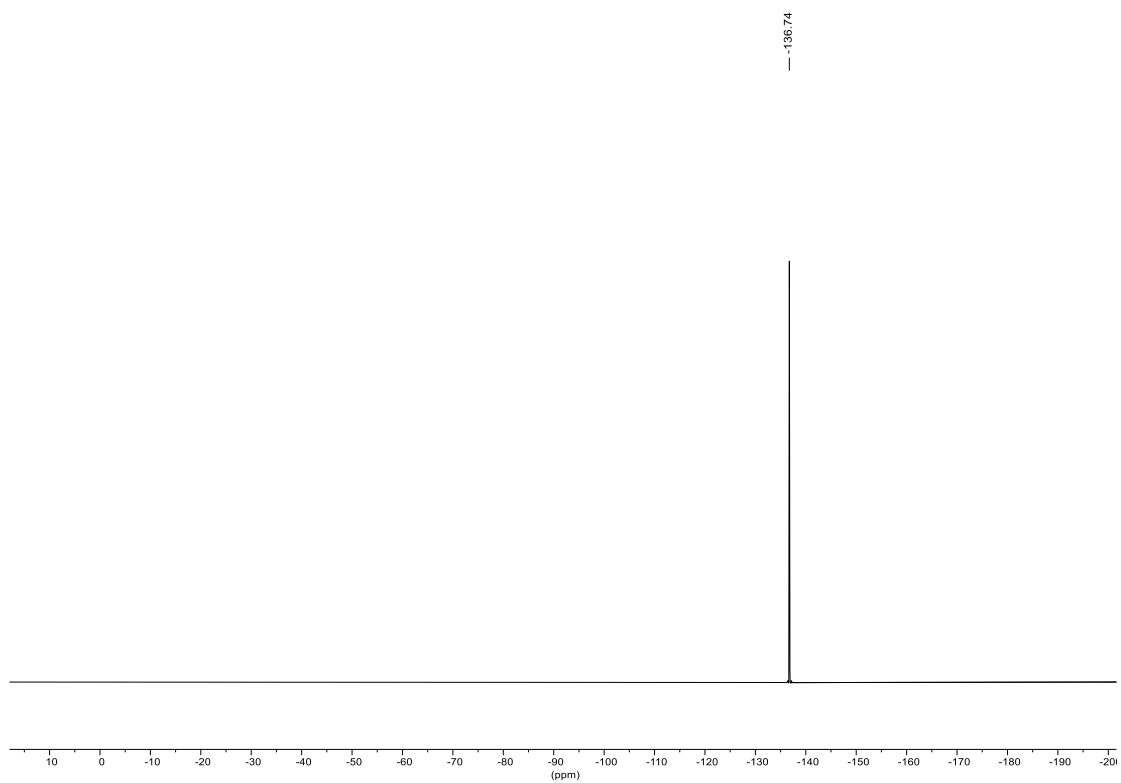

**Figure S23.**  $^1\text{H}$ ,  $^{13}\text{C}$  and  $^{19}\text{F}$  NMR spectrum of **4e**.

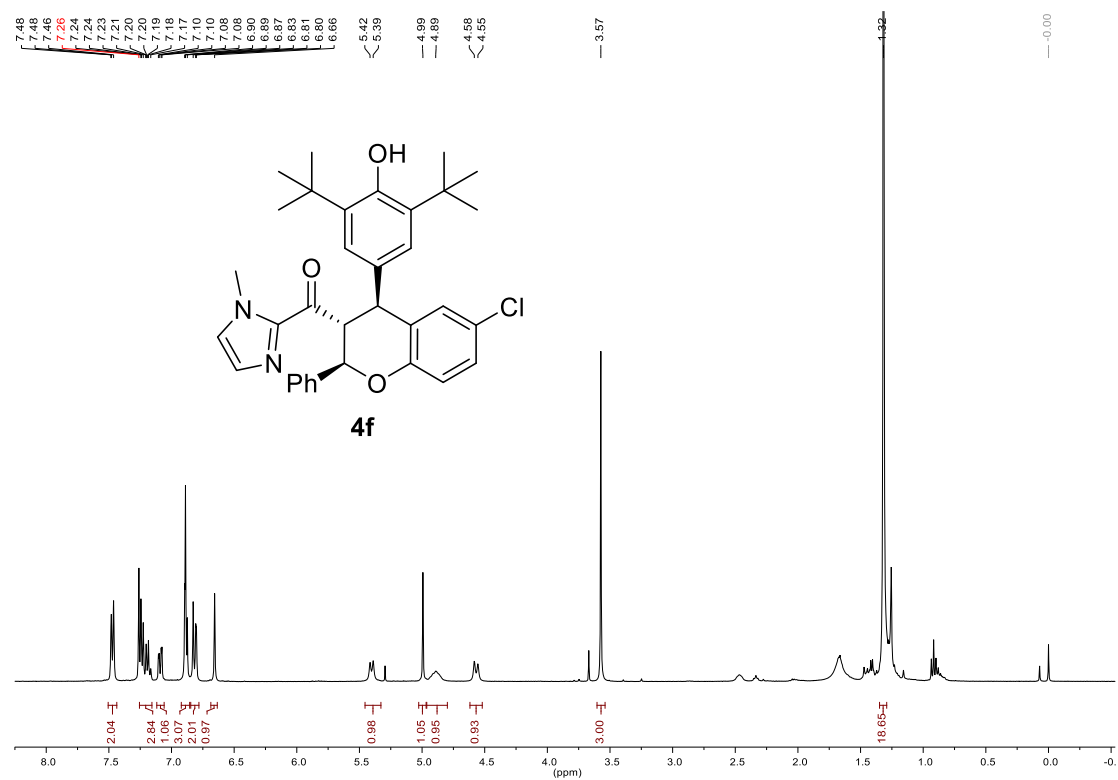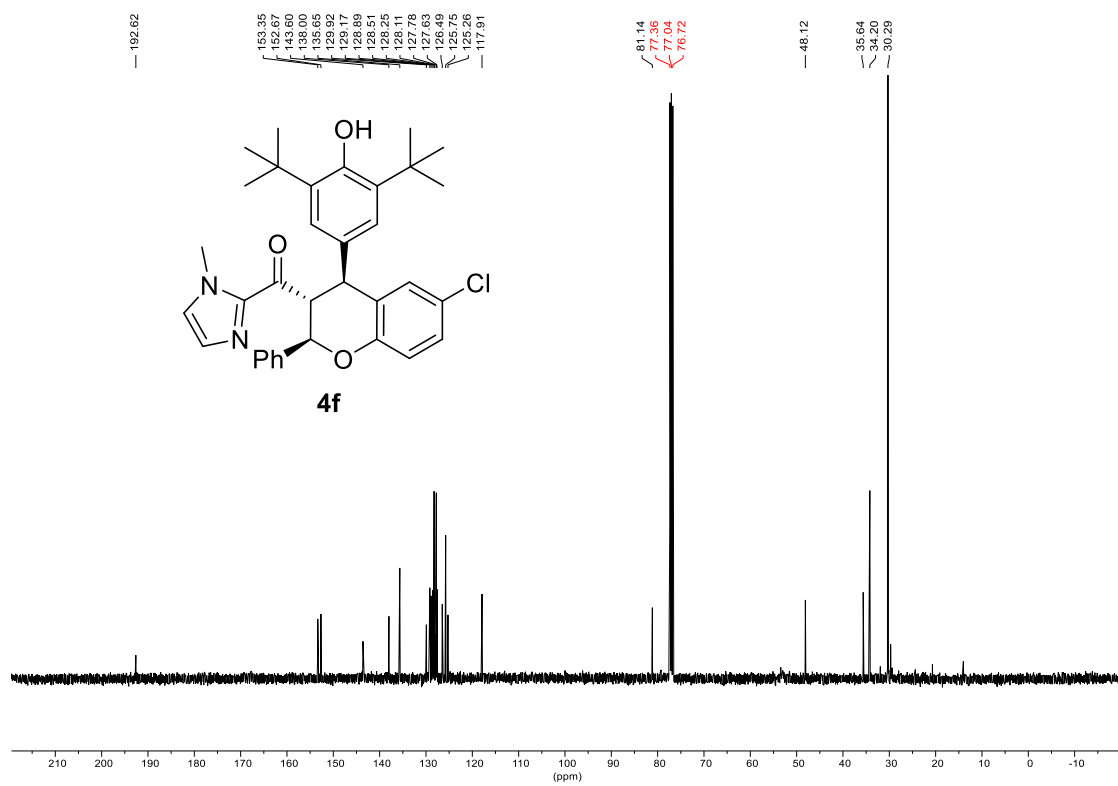

Figure S24. <sup>1</sup>H and <sup>13</sup>C NMR spectrum of 4f.



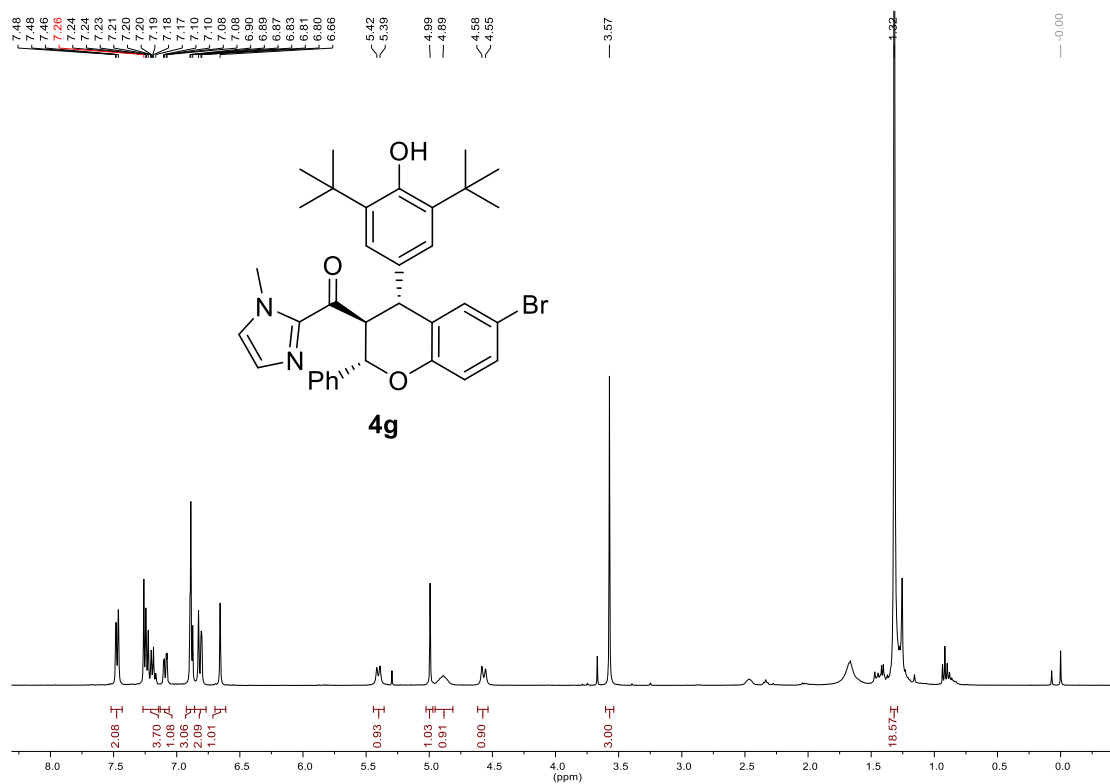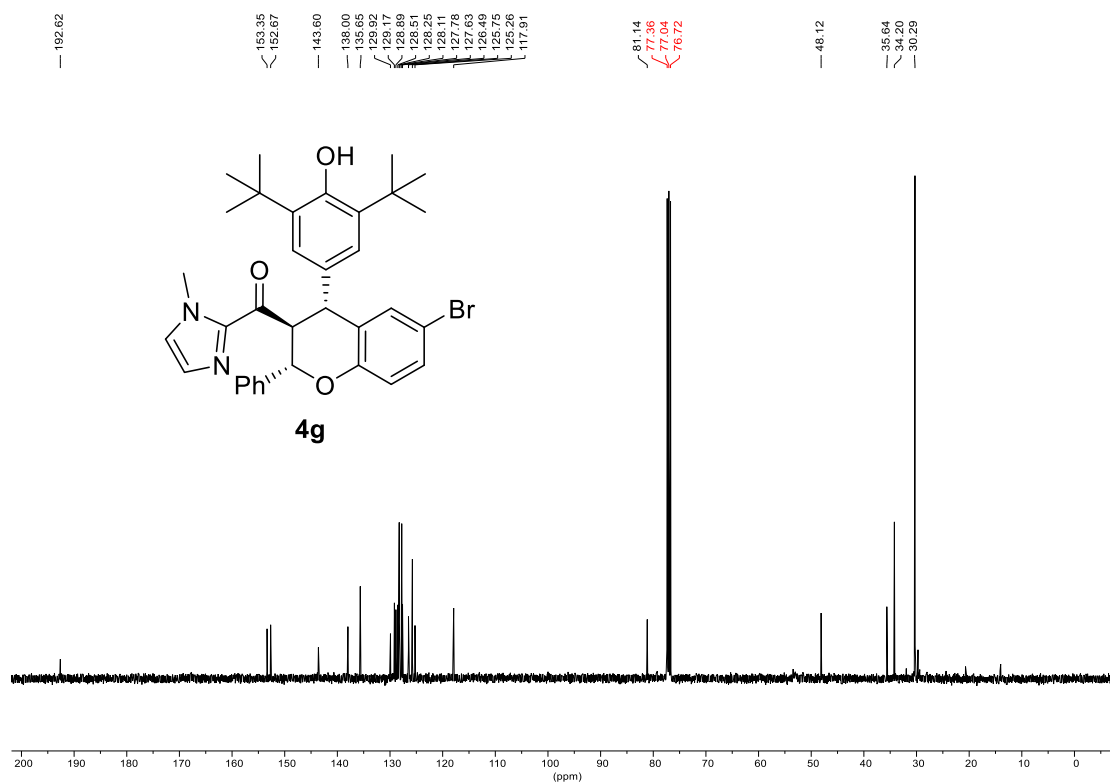

**Figure S25.** <sup>1</sup>H and <sup>13</sup>C NMR spectrum of **4g**.

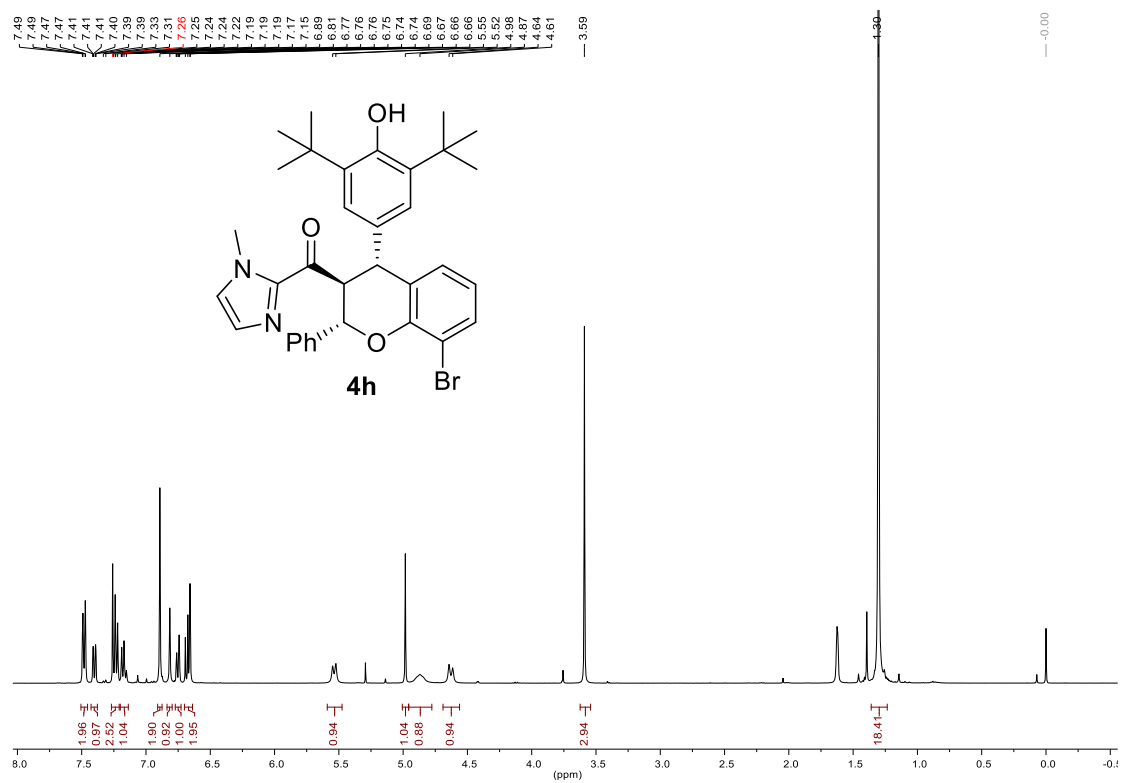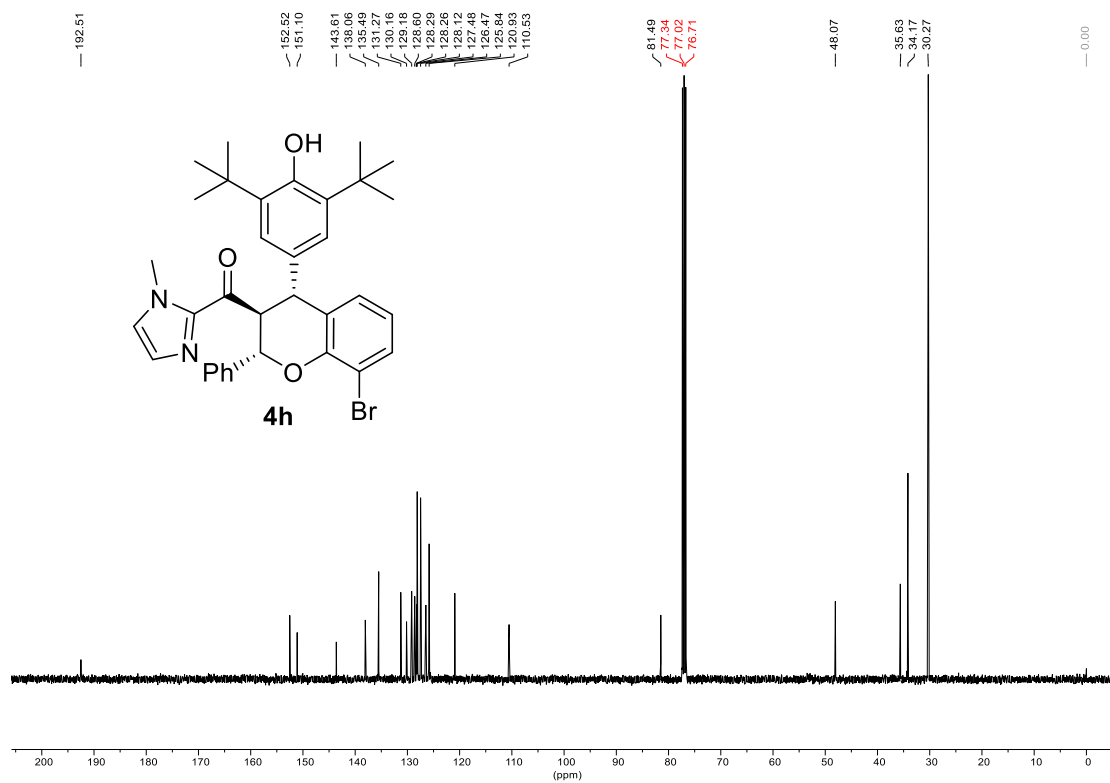

Figure S26. <sup>1</sup>H and <sup>13</sup>C NMR spectrum of 4h.

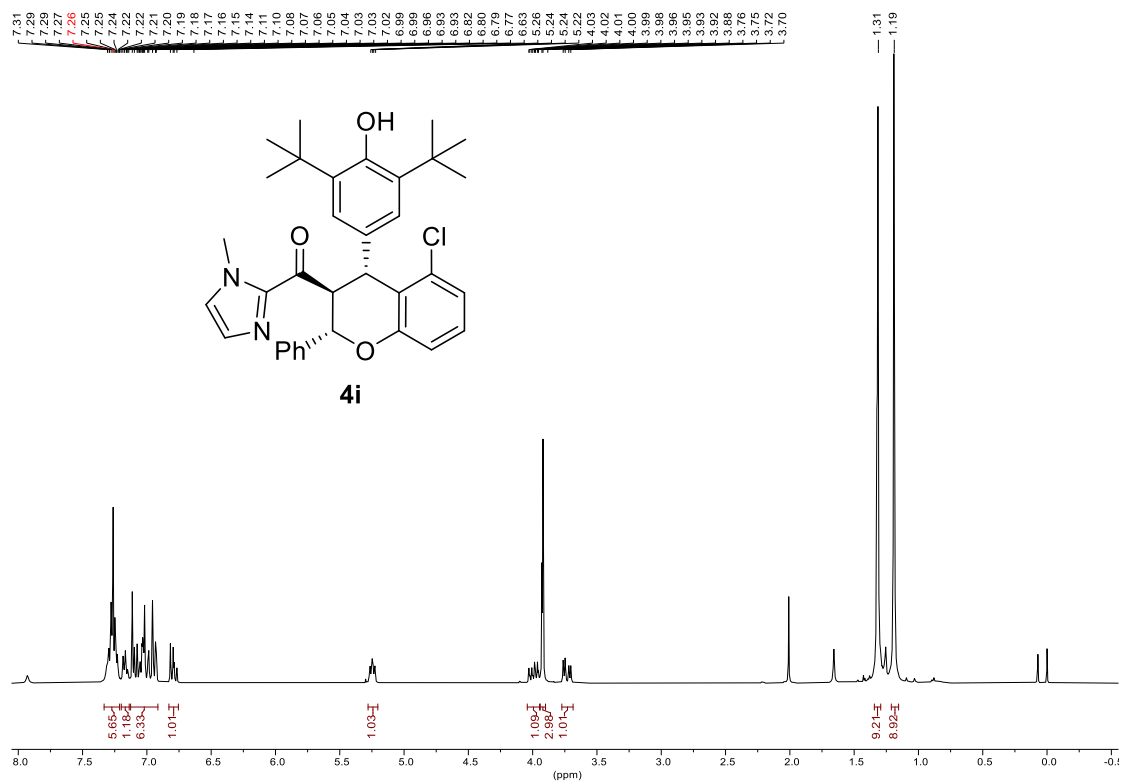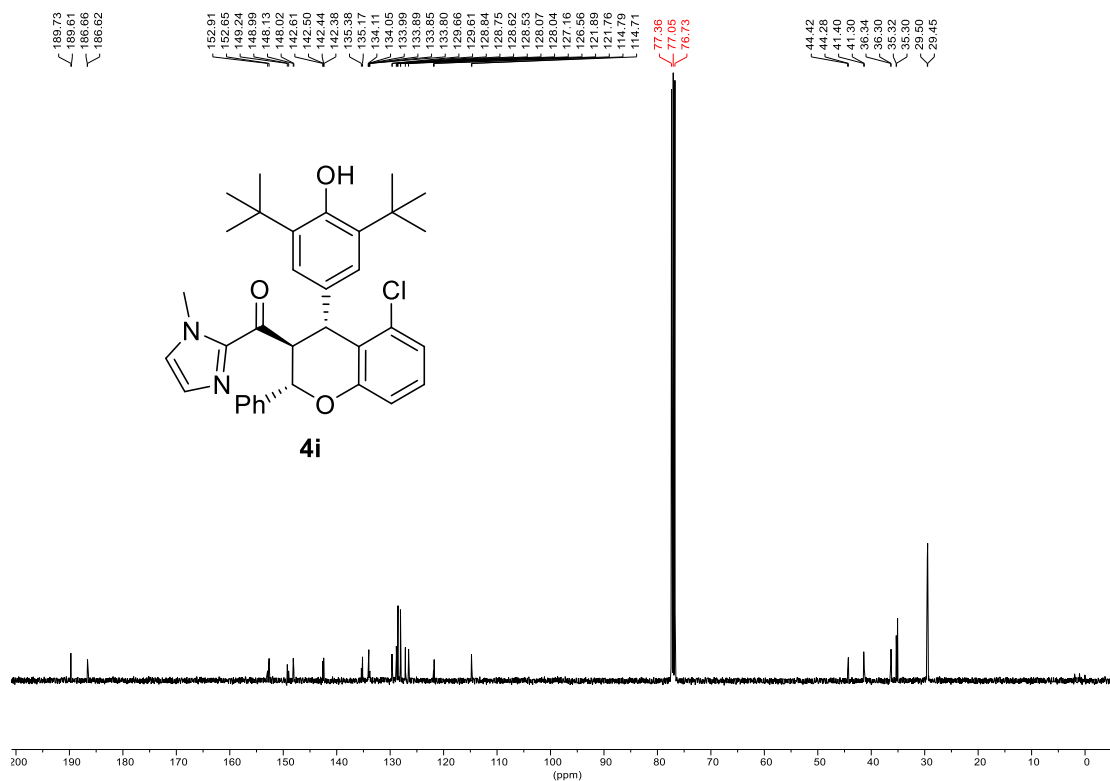

**Figure S27.** <sup>1</sup>H and <sup>13</sup>C NMR spectrum of **4i**.

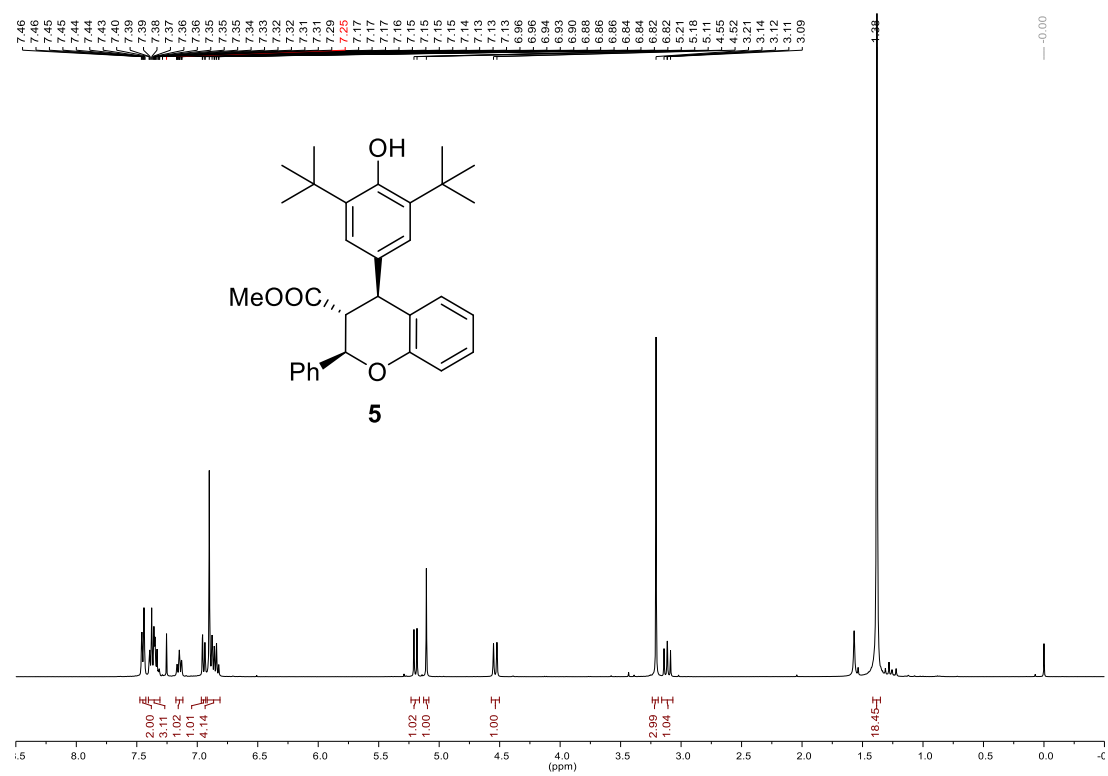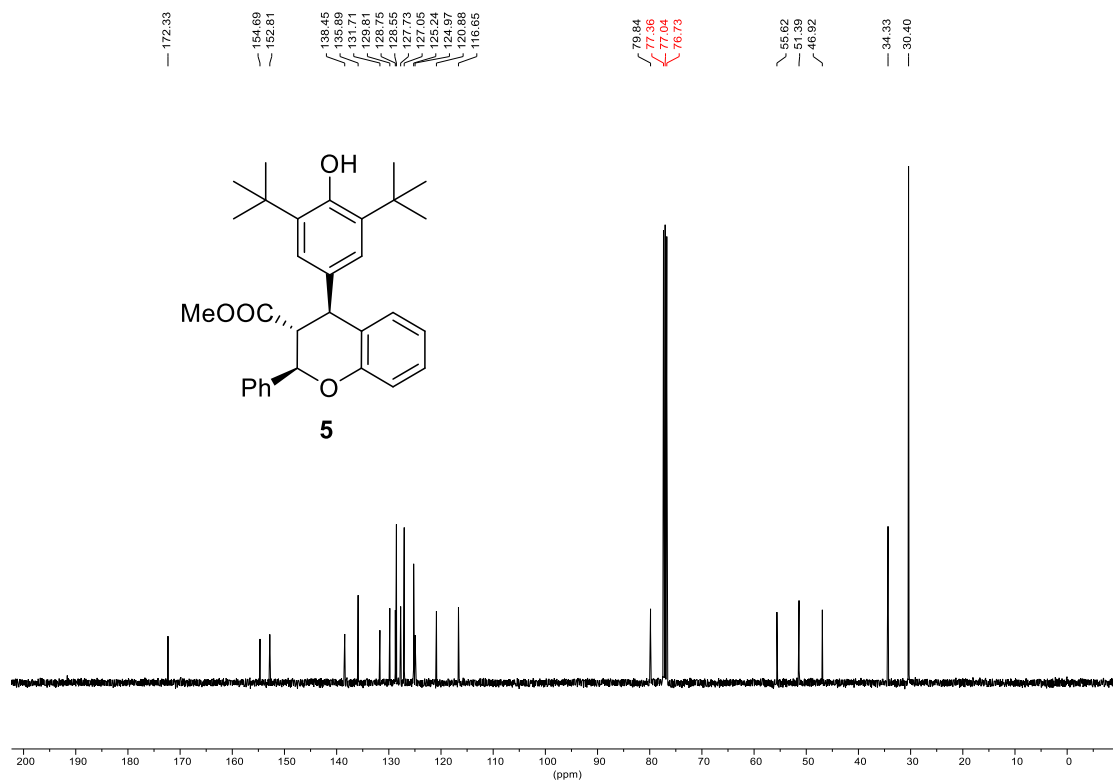

Figure S28. <sup>1</sup>H and <sup>13</sup>C NMR spectrum of 5.

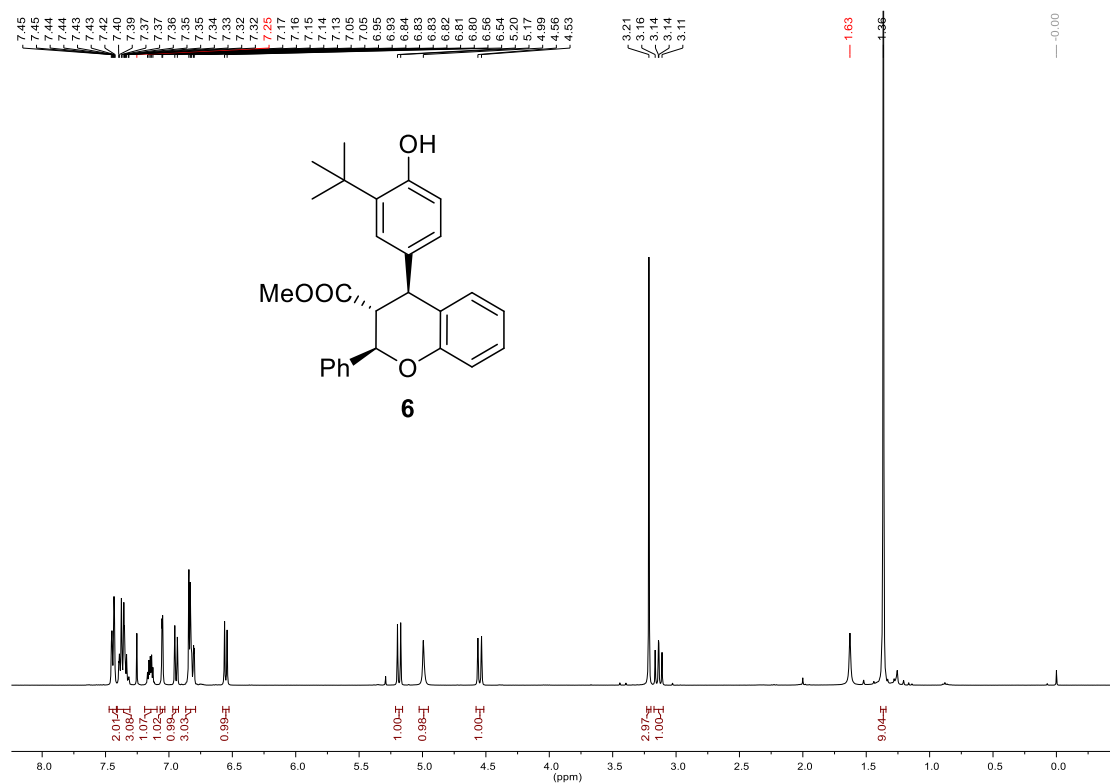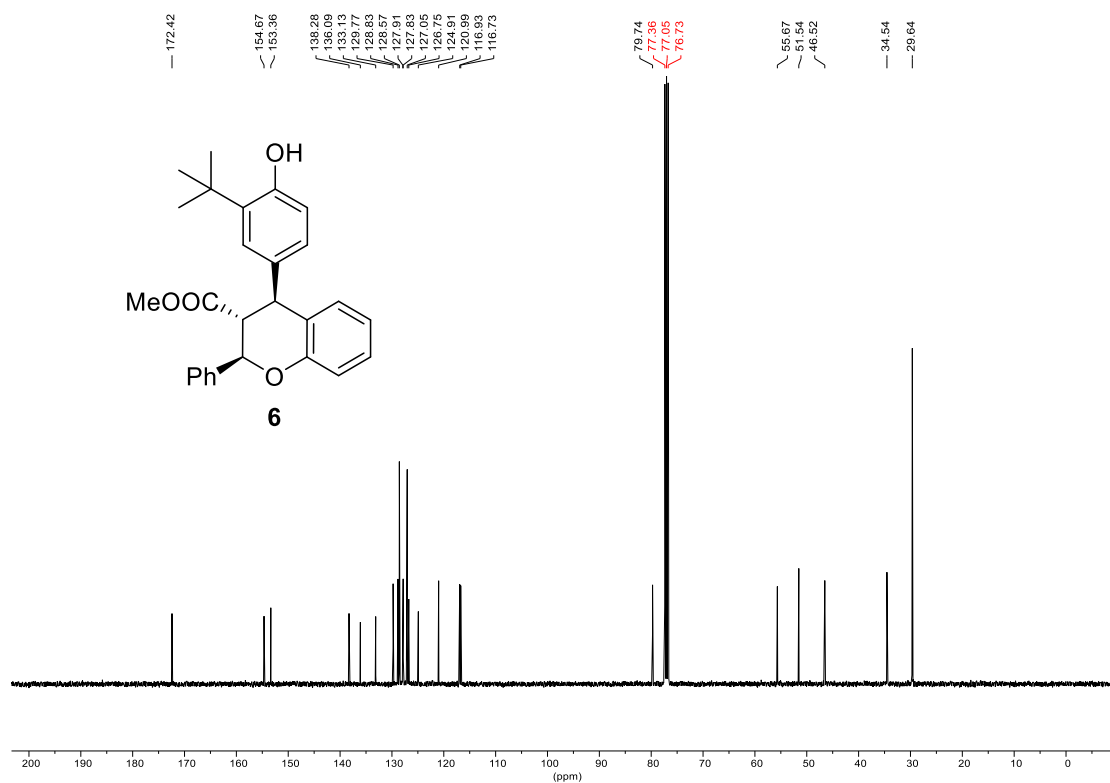

**Figure S29.** <sup>1</sup>H and <sup>13</sup>C NMR spectrum of 6.

## 7. HPLC Traces on Chiral Stationary Phase

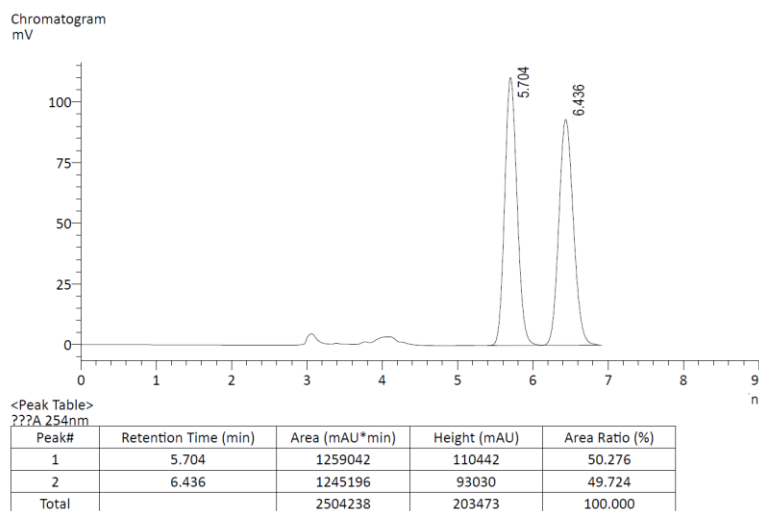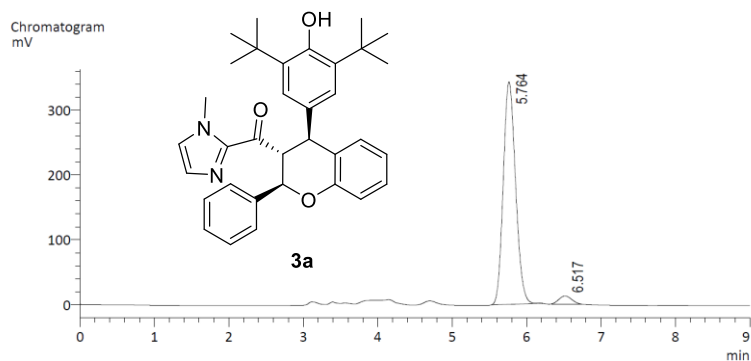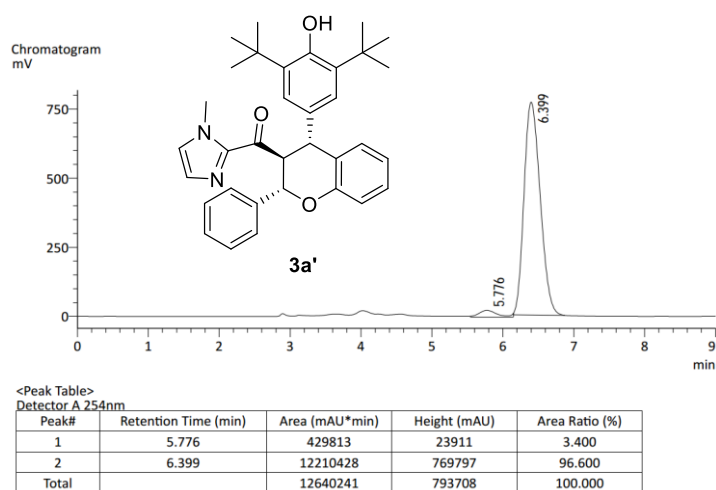

**Figure S30.** HPLC traces of racemic (reference) and chiral **3a**, **3a'**. Area integration = 96.5: 3.5 (93% ee) and 3.4: 96.6 (93% ee).

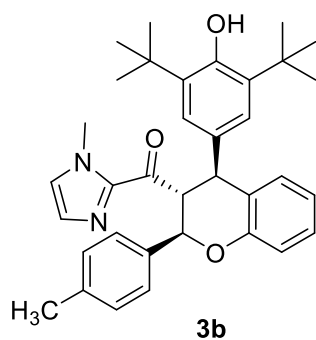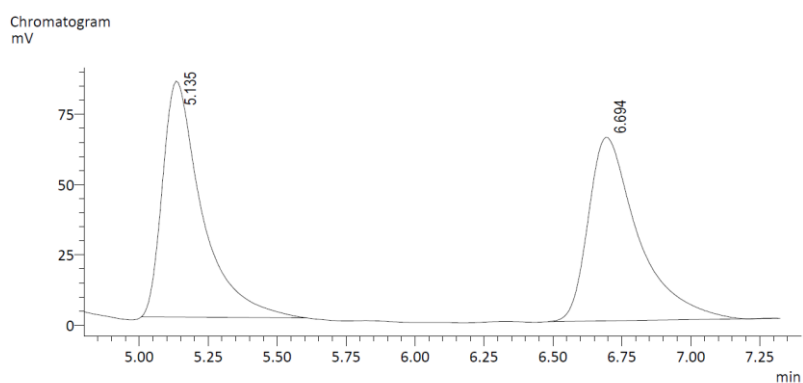

<Peak Table>

Detector A 254nm

| Peak# | Retention Time (min) | Area (mAU*min) | Height (mAU) | Area Ratio (%) |
|-------|----------------------|----------------|--------------|----------------|
| 1     | 5.135                | 833992         | 83874        | 50.396         |
| 2     | 6.694                | 820877         | 65272        | 49.604         |
| Total |                      | 1654869        | 149146       | 100.000        |

Chromatogram  
mV

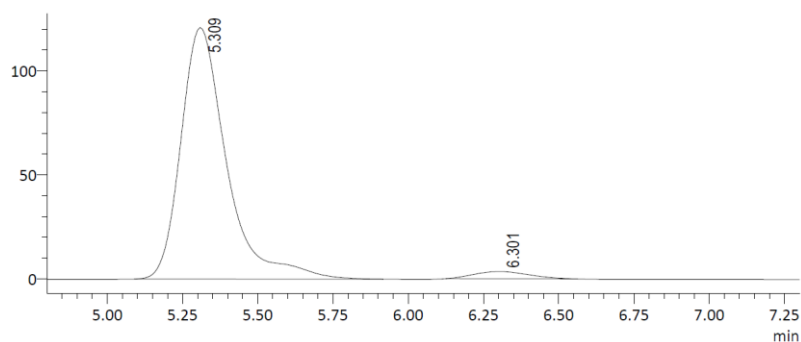

<Peak Table>

Detector A 254nm

| Peak# | Retention Time (min) | Area (mAU*min) | Height (mAU) | Area Ratio (%) |
|-------|----------------------|----------------|--------------|----------------|
| 1     | 5.309                | 1277354        | 120980       | 96.664         |
| 2     | 6.301                | 44083          | 3476         | 3.336          |
| Total |                      | 1321437        | 124456       | 100.000        |

**Figure S31.** HPLC traces of racemic **3b** (reference) and chiral **3b**. Area integration = 96.7:3.3 (93% ee).

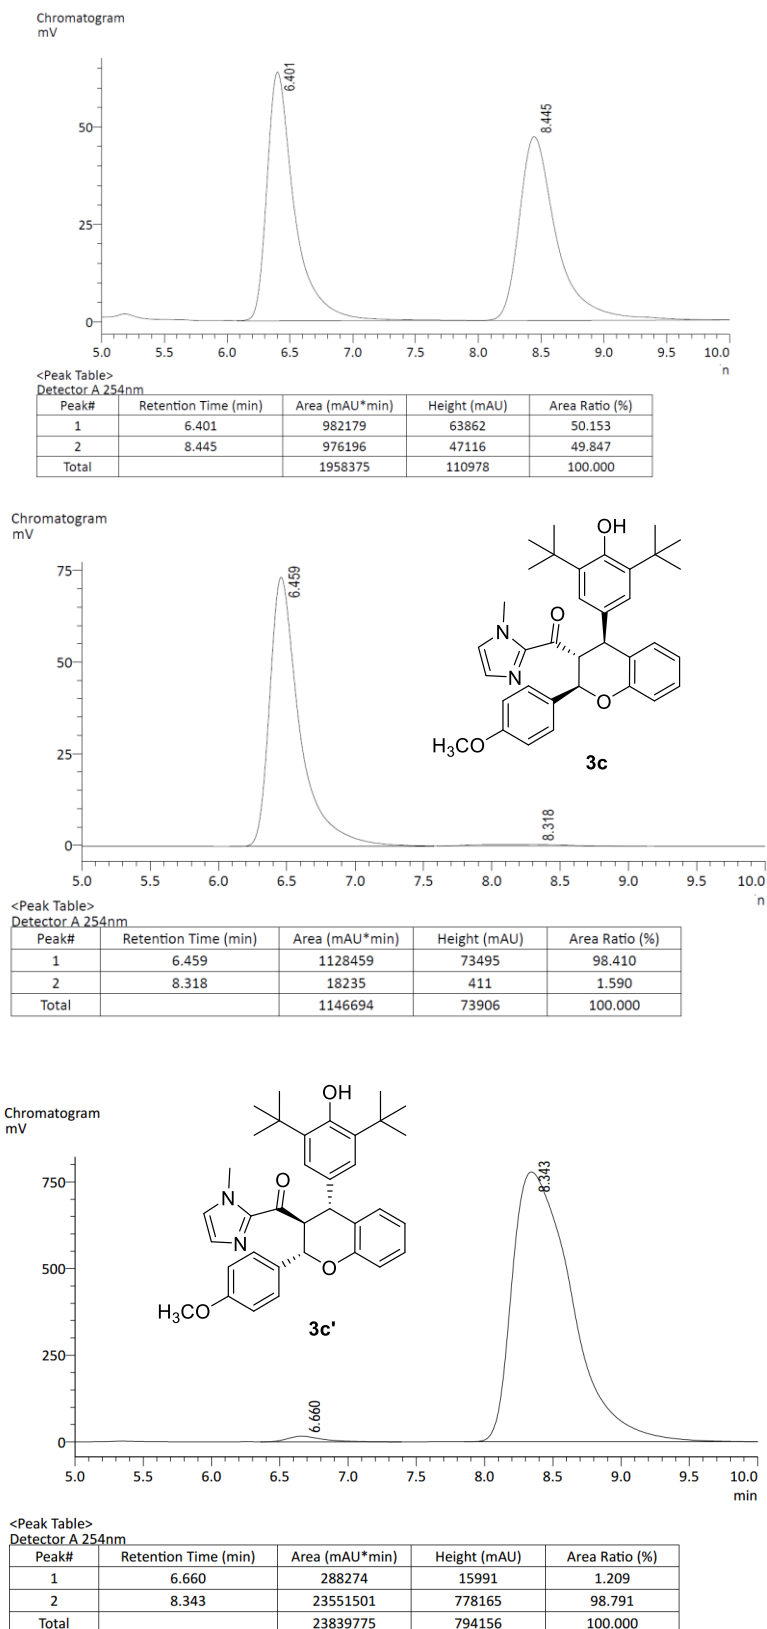

**Figure S32.** HPLC traces of racemic (reference) and chiral **3c**, **3c'**. Area integration = 98.4:1.6 (97% ee) and 1.2: 98.8 (98% ee).



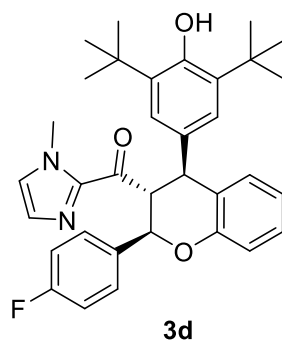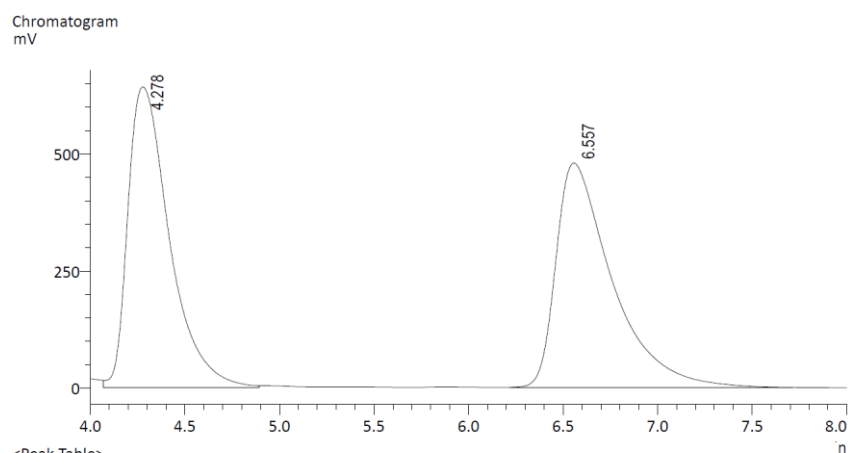

<Peak Table>  
Detector A 254nm

| Peak# | Retention Time (min) | Area (mAU*min) | Height (mAU) | Area Ratio (%) |
|-------|----------------------|----------------|--------------|----------------|
| 1     | 4.278                | 9860378        | 642865       | 49.896         |
| 2     | 6.557                | 9901591        | 479141       | 50.104         |
| Total |                      | 19761969       | 1122005      | 100.000        |

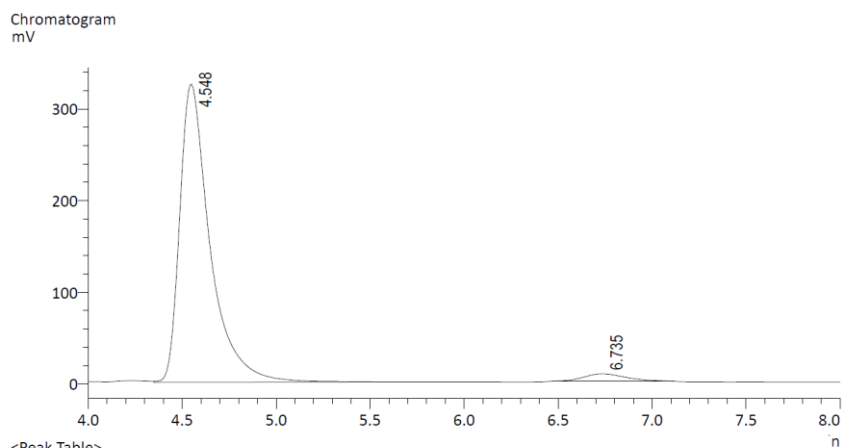

<Peak Table>  
Detector A 254nm

| Peak# | Retention Time (min) | Area (mAU*min) | Height (mAU) | Area Ratio (%) |
|-------|----------------------|----------------|--------------|----------------|
| 1     | 4.548                | 3642485        | 325217       | 96.526         |
| 2     | 6.735                | 131077         | 8151         | 3.474          |
| Total |                      | 3773562        | 333368       | 100.000        |

**Figure S33.** HPLC traces of racemic **3d** (reference) and chiral **3d**. Area integration = 96.5:3.5 (93% ee).

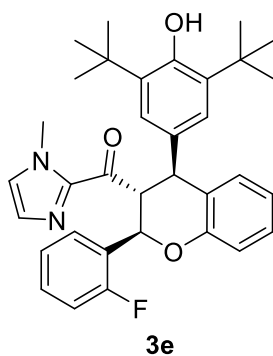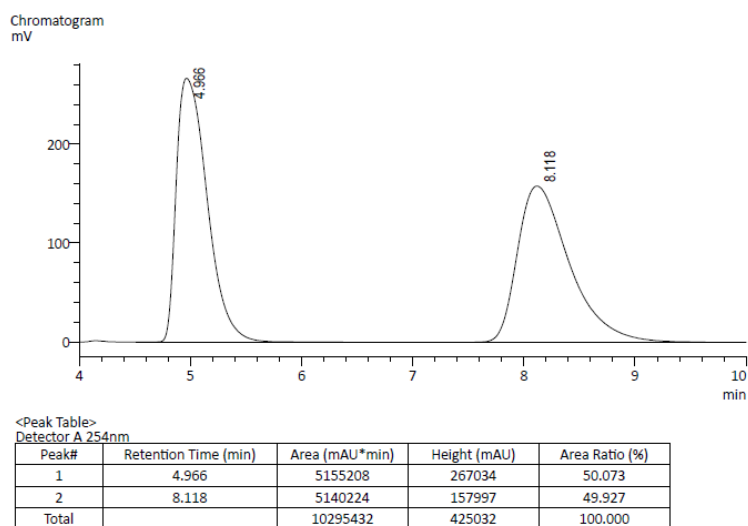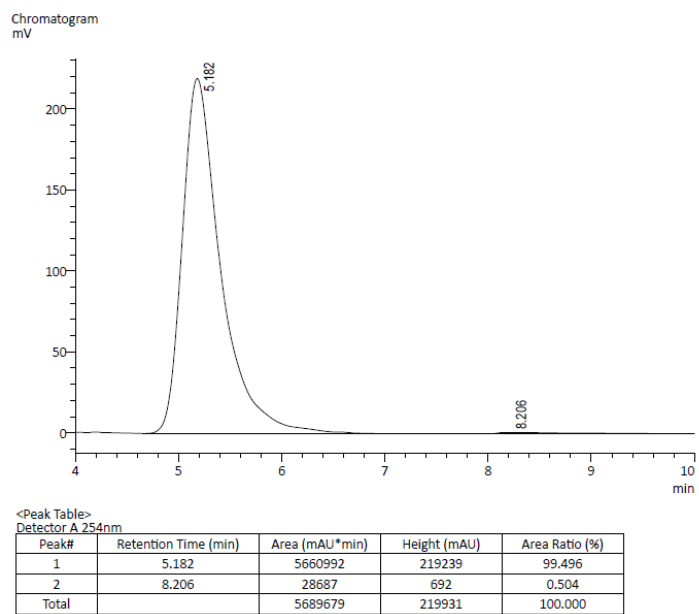

**Figure S34.** HPLC traces of racemic **3e** (reference) and chiral **3e**. Area integration = 99.5:0.5 (99% ee).

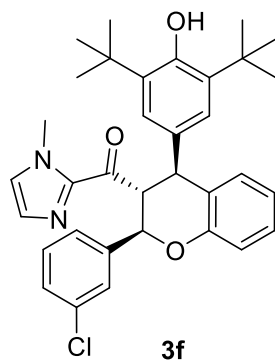

Chromatogram  
mV

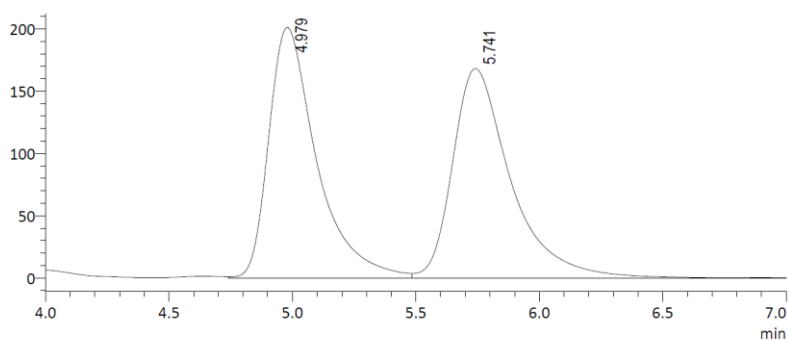

<Peak Table>  
Detector A 254nm

| Peak# | Retention Time (min) | Area (mAU*min) | Height (mAU) | Area Ratio (%) |
|-------|----------------------|----------------|--------------|----------------|
| 1     | 4.979                | 2715322        | 201180       | 49.515         |
| 2     | 5.741                | 2768550        | 168334       | 50.485         |
| Total |                      | 5483873        | 369514       | 100.000        |

Chromatogram  
mV

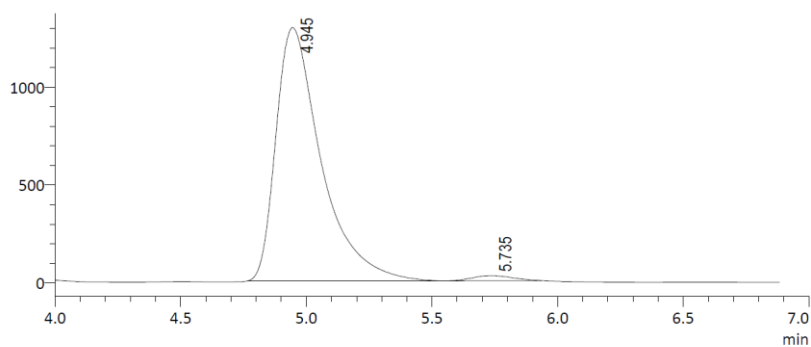

<Peak Table>  
Detector A 254nm

| Peak# | Retention Time (min) | Area (mAU*min) | Height (mAU) | Area Ratio (%) |
|-------|----------------------|----------------|--------------|----------------|
| 1     | 4.945                | 16219778       | 1295898      | 98.230         |
| 2     | 5.735                | 292303         | 26166        | 1.770          |
| Total |                      | 16512081       | 1322063      | 100.000        |

**Figure S35.** HPLC traces of racemic **3f** (reference) and chiral **3f**. Area integration = 98.2:1.8 (96% ee).

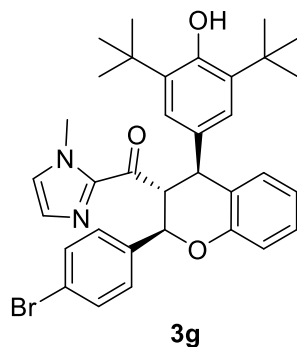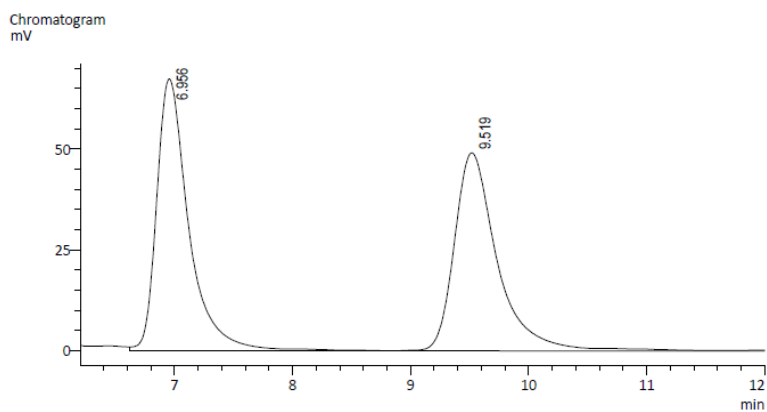

<Peak Table>  
Detector A 254nm

| Peak# | Retention Time (min) | Area (mAU*min) | Height (mAU) | Area Ratio (%) |
|-------|----------------------|----------------|--------------|----------------|
| 1     | 6.956                | 1281368        | 67368        | 50.465         |
| 2     | 9.519                | 1257762        | 49069        | 49.535         |
| Total |                      | 2539130        | 116436       | 100.000        |

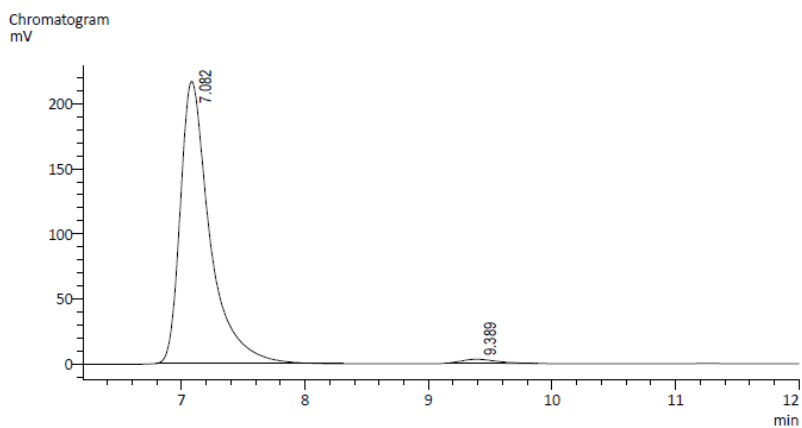

<Peak Table>  
Detector A 254nm

| Peak# | Retention Time (min) | Area (mAU*min) | Height (mAU) | Area Ratio (%) |
|-------|----------------------|----------------|--------------|----------------|
| 1     | 7.082                | 3620149        | 216884       | 98.523         |
| 2     | 9.389                | 54260          | 2930         | 1.477          |
| Total |                      | 3674409        | 219814       | 100.000        |

**Figure S36.** HPLC traces of racemic **3g** (reference) and chiral **3g**. Area integration = 98.5:1.5 (97% ee).

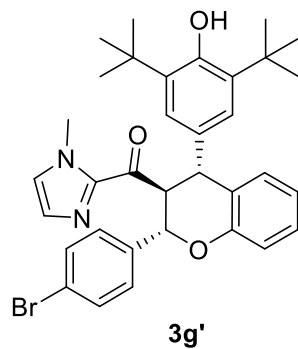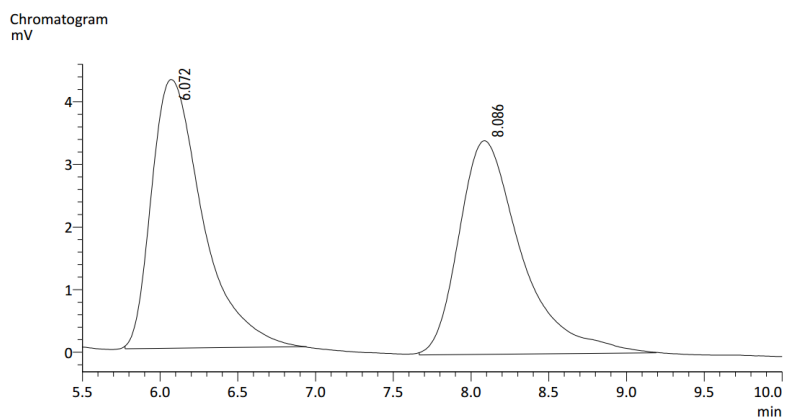

<Peak Table>  
Detector A 254nm

| Peak# | Retention Time (min) | Area (mAU*min) | Height (mAU) | Area Ratio (%) |
|-------|----------------------|----------------|--------------|----------------|
| 1     | 6.072                | 98194          | 4291         | 50.724         |
| 2     | 8.086                | 95390          | 3413         | 49.276         |
| Total |                      | 193584         | 7704         | 100.000        |

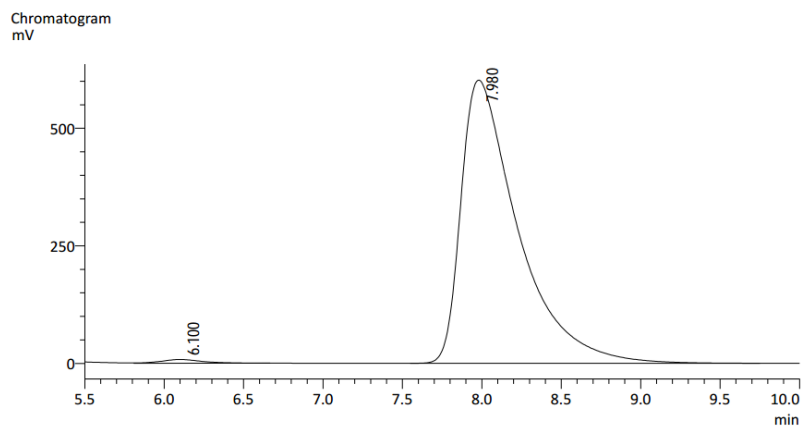

<Peak Table>  
Detector A 254nm

| Peak# | Retention Time (min) | Area (mAU*min) | Height (mAU) | Area Ratio (%) |
|-------|----------------------|----------------|--------------|----------------|
| 1     | 6.100                | 143012         | 7974         | 0.944          |
| 2     | 7.980                | 15000259       | 602192       | 99.056         |
| Total |                      | 15143271       | 610166       | 100.000        |

**Figure S37.** HPLC traces of racemic (reference) and chiral **3g'**. Area integration = 0.9:99.1 (98% ee).

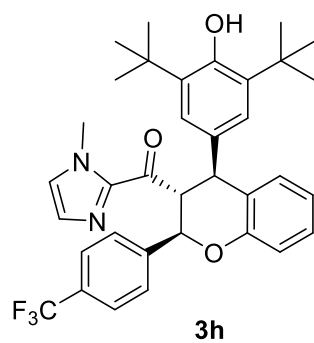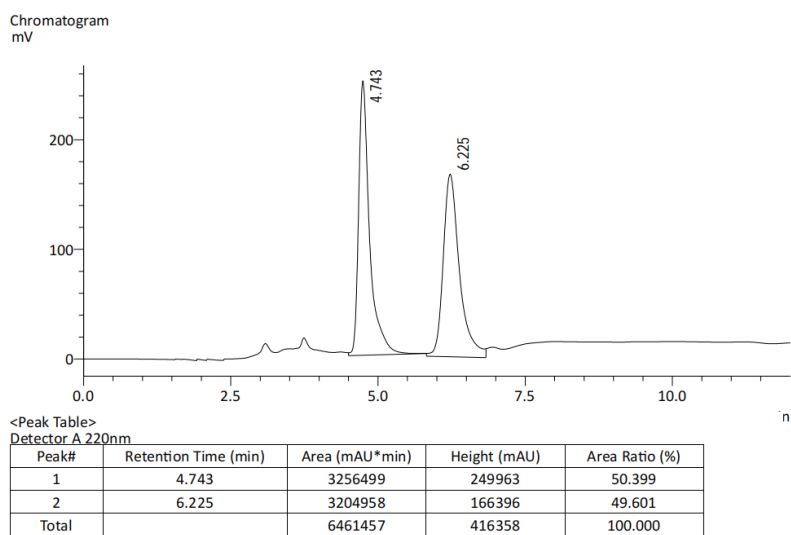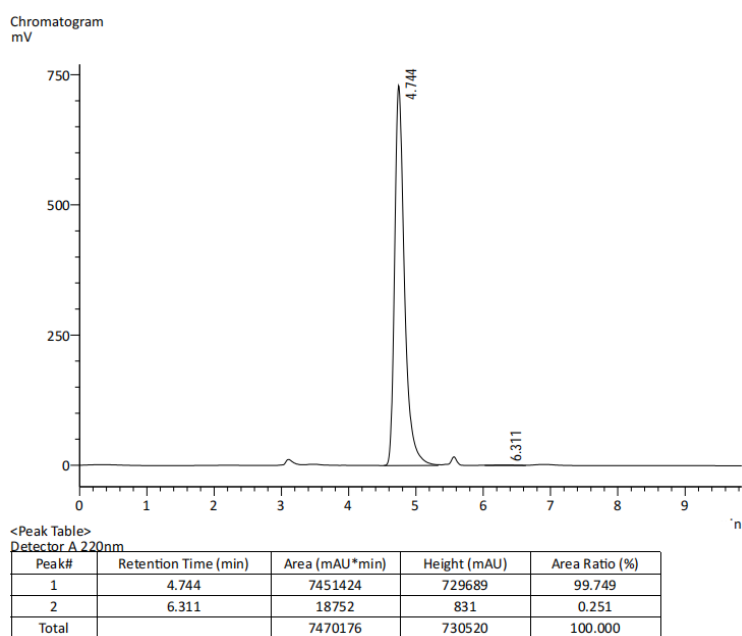

**Figure S38.** HPLC traces of racemic **3h** (reference) and chiral **3h**. Area integration = 99.7:0.3 (99.4% ee).

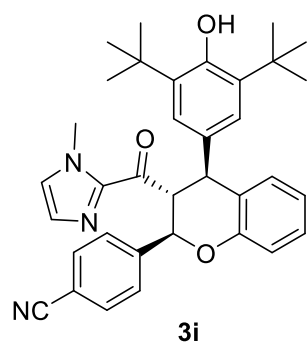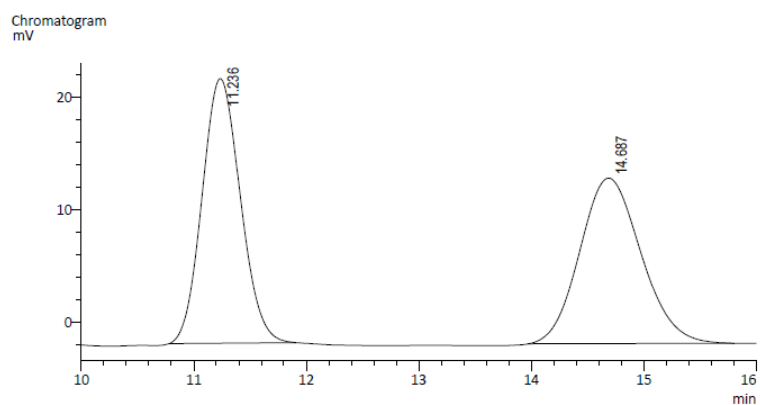

<Peak Table>

Detector A 254nm

| Peak# | Retention Time (min) | Area (mAU*min) | Height (mAU) | Area Ratio (%) |
|-------|----------------------|----------------|--------------|----------------|
| 1     | 11.236               | 557264         | 23562        | 49.978         |
| 2     | 14.687               | 557745         | 14731        | 50.022         |
| Total |                      | 1115009        | 38293        | 100.000        |

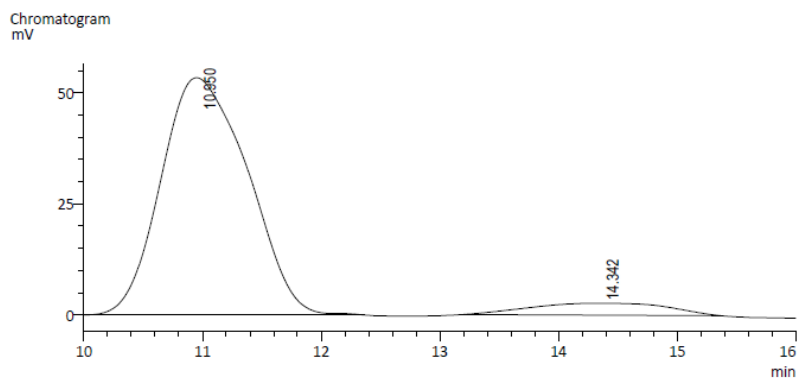

<Peak Table>

Detector A 254nm

| Peak# | Retention Time (min) | Area (mAU*min) | Height (mAU) | Area Ratio (%) |
|-------|----------------------|----------------|--------------|----------------|
| 1     | 10.950               | 2713302        | 53415        | 92.691         |
| 2     | 14.342               | 213954         | 2636         | 7.309          |
| Total |                      | 2927257        | 56050        | 100.000        |

**Figure S39.** HPLC traces of racemic **3i** (reference) and chiral **3i**. Area integration = 92.7:7.3 (85% ee).

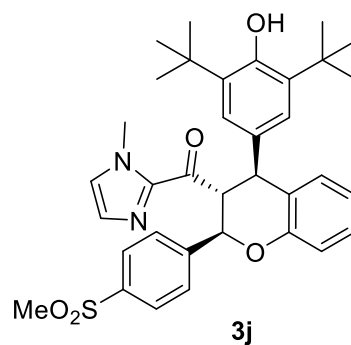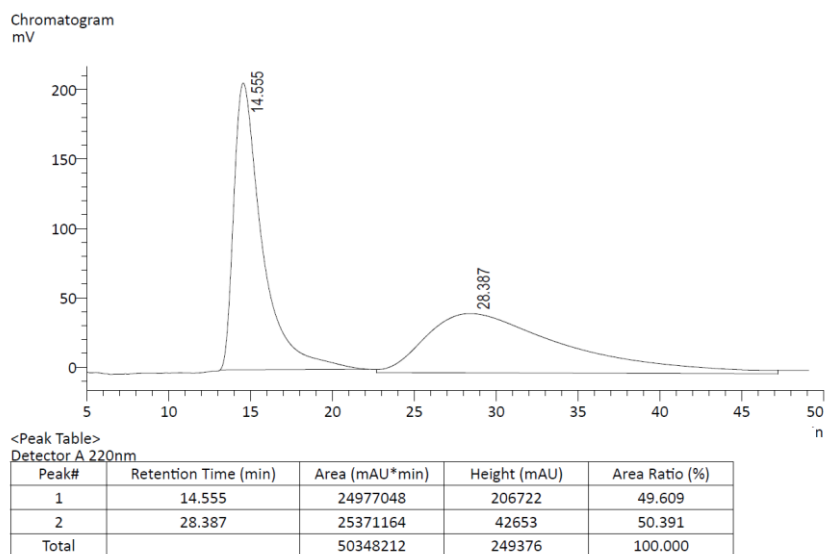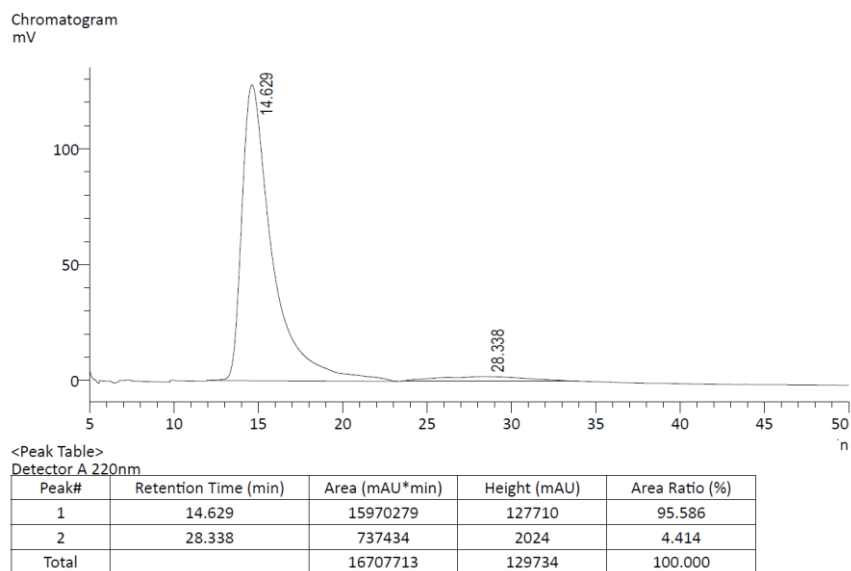

**Figure S40.** HPLC traces of racemic **3j** (reference) and chiral **3j**. Area integration = 95.6:4.4 (91% ee).



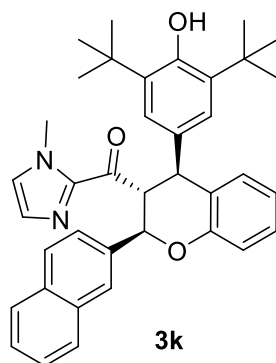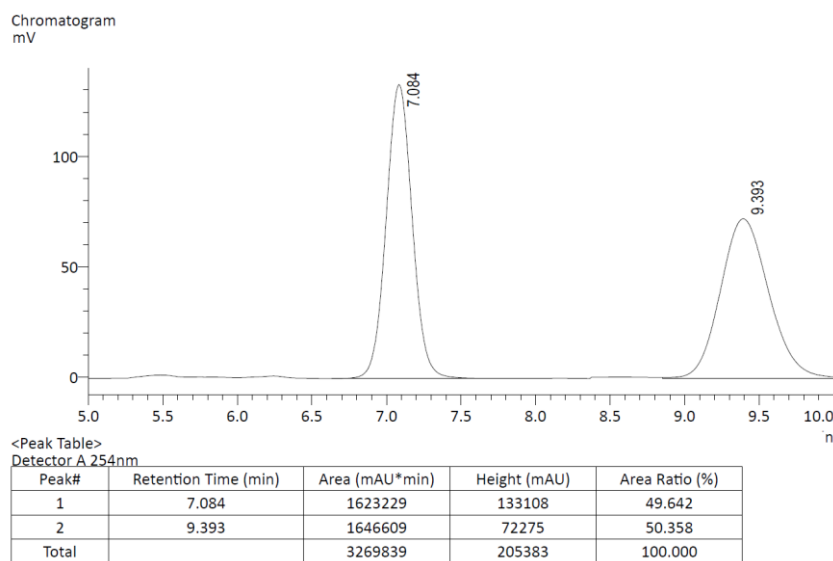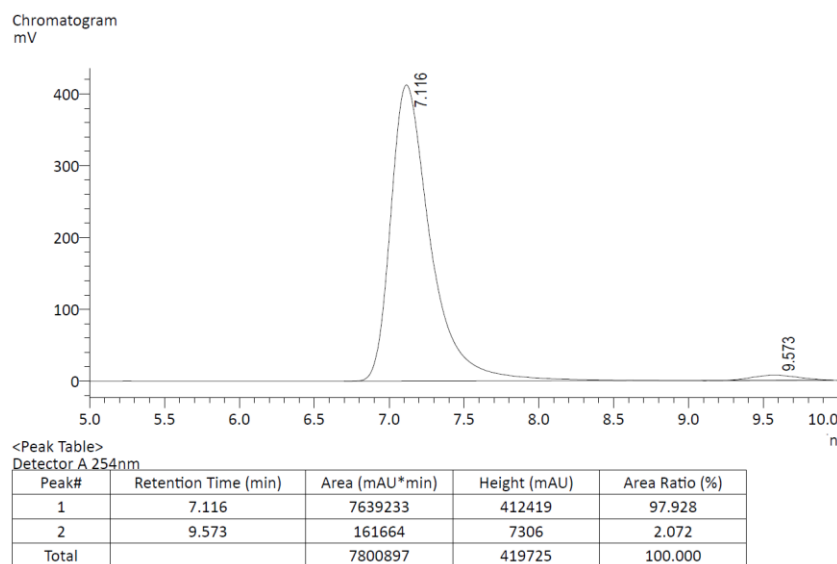

**Figure S41.** HPLC traces of racemic **3k** (reference) and chiral **3k**. Area integration = 97.9:2.1 (96% ee).

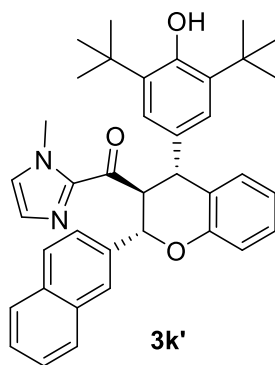

Chromatogram  
mV

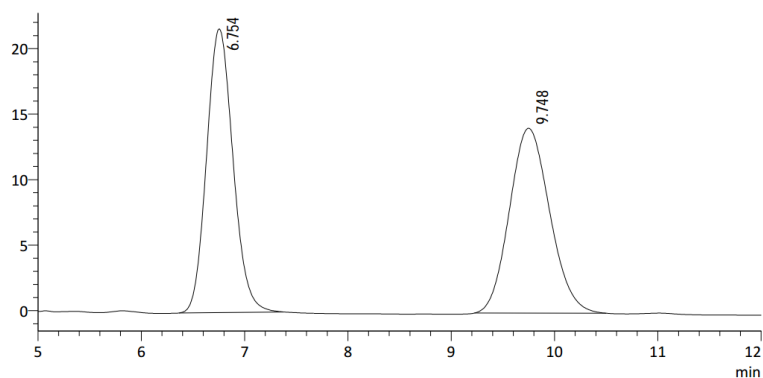

<Peak Table>  
Detector A 254nm

| Peak# | Retention Time (min) | Area (mAU*min) | Height (mAU) | Area Ratio (%) |
|-------|----------------------|----------------|--------------|----------------|
| 1     | 6.754                | 385358         | 21647        | 50.172         |
| 2     | 9.748                | 382720         | 14116        | 49.828         |
| Total |                      | 768078         | 35763        | 100.000        |

Chromatogram  
mV

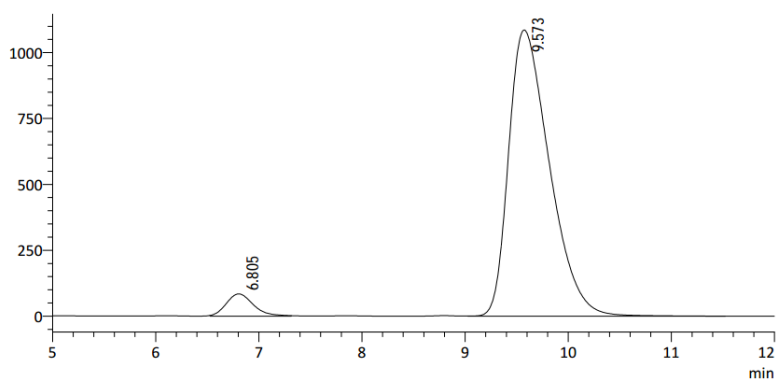

<Peak Table>  
Detector A 254nm

| Peak# | Retention Time (min) | Area (mAU*min) | Height (mAU) | Area Ratio (%) |
|-------|----------------------|----------------|--------------|----------------|
| 1     | 6.805                | 1542668        | 84277        | 4.915          |
| 2     | 9.573                | 29845358       | 1085784      | 95.085         |
| Total |                      | 31388025       | 1170061      | 100.000        |

**Figure S42.** HPLC traces of racemic (reference) and chiral **3k'**. Area integration = 4.9:95.1 (90% ee).

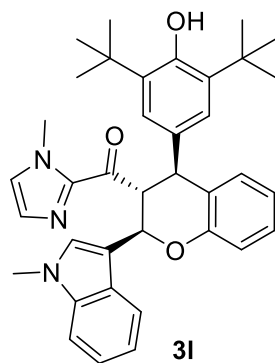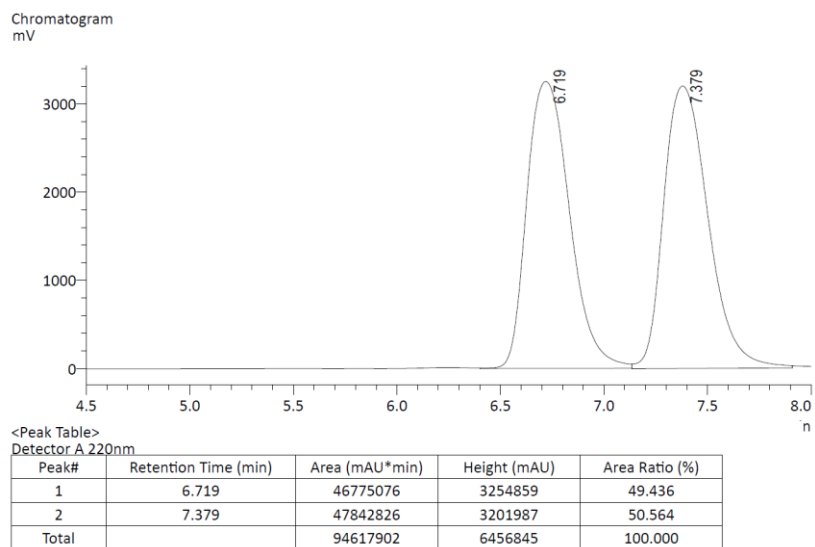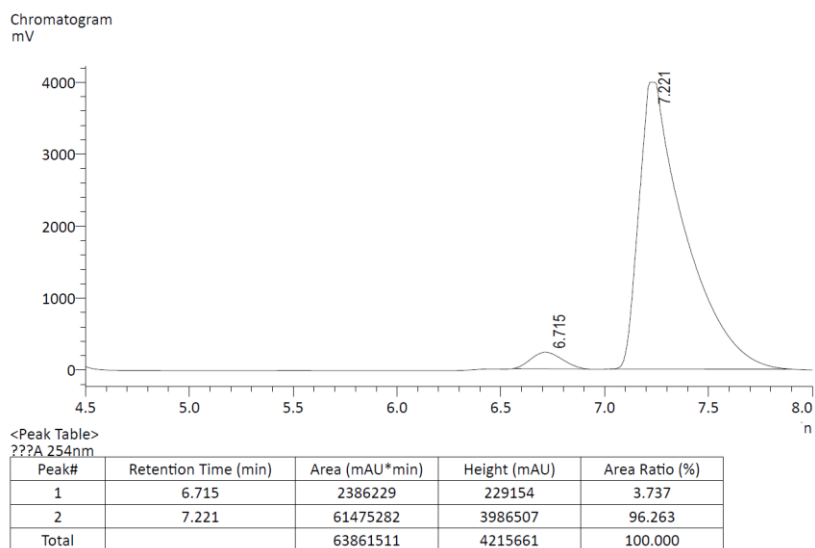

**Figure S43.** HPLC traces of racemic **31** (reference) and chiral **31**. Area integration = 3.7:96.3 (93% ee).

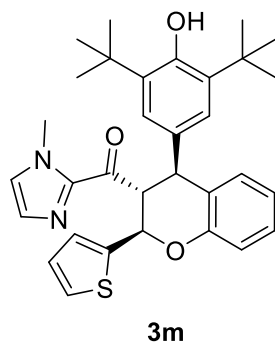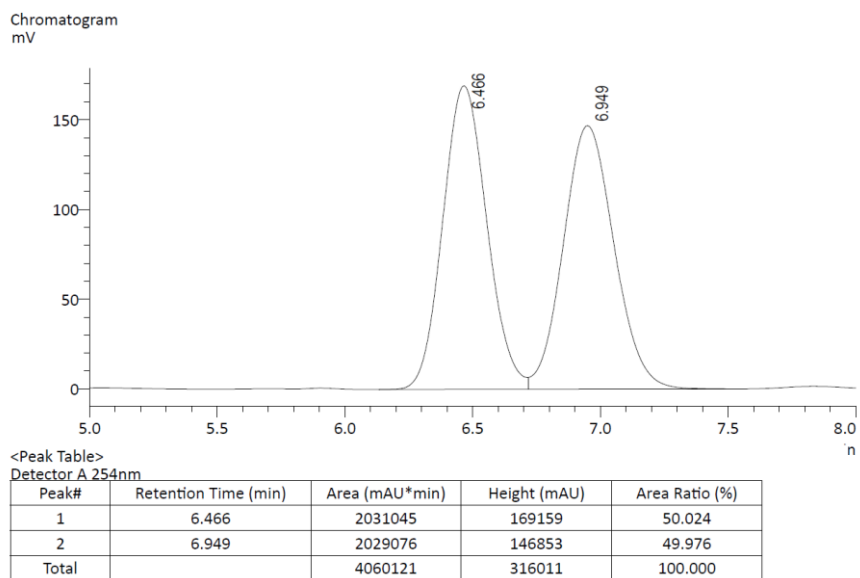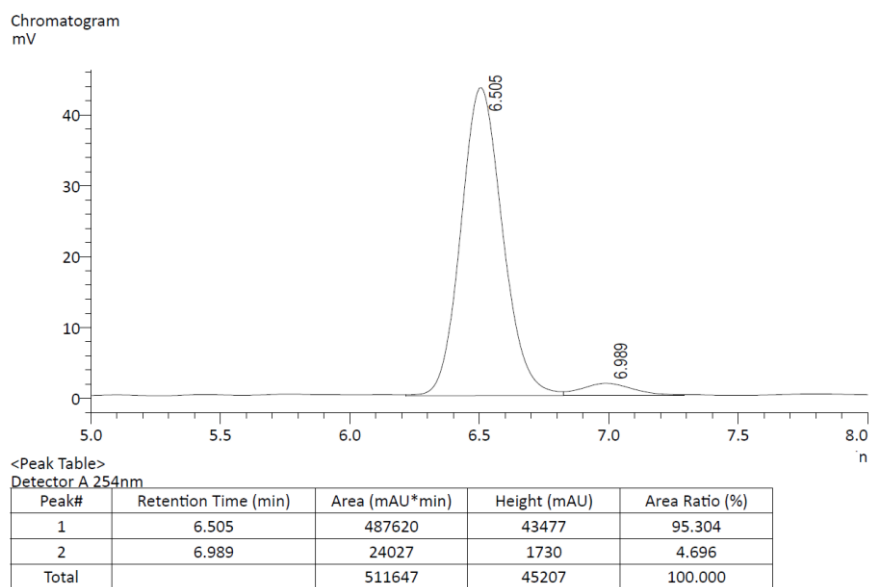

**Figure S44.** HPLC traces of racemic **3m** (reference) and chiral **3m**. Area integration = 95.3:4.7 (91% ee).

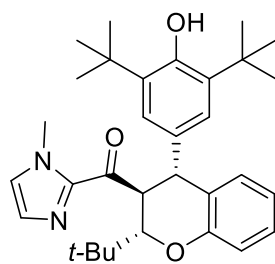

**3n**

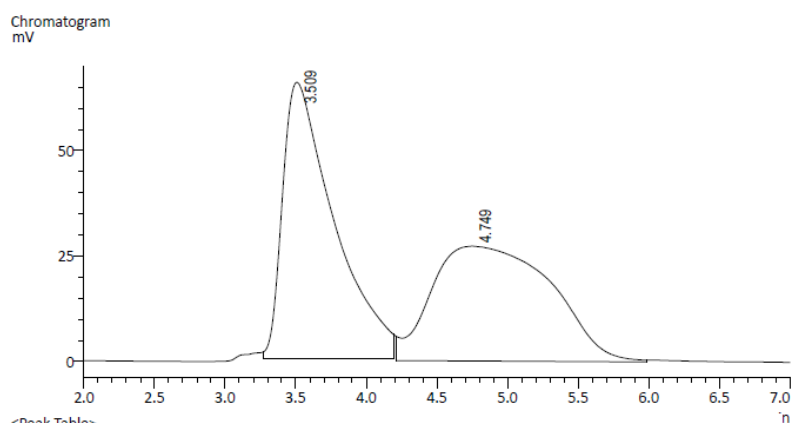

<Peak Table>  
Detector A 254nm

| Peak# | Retention Time (min) | Area (mAU*min) | Height (mAU) | Area Ratio (%) |
|-------|----------------------|----------------|--------------|----------------|
| 1     | 3.509                | 1664427        | 65650        | 50.734         |
| 2     | 4.749                | 1616265        | 27204        | 49.266         |
| Total |                      | 3280692        | 92854        | 100.000        |

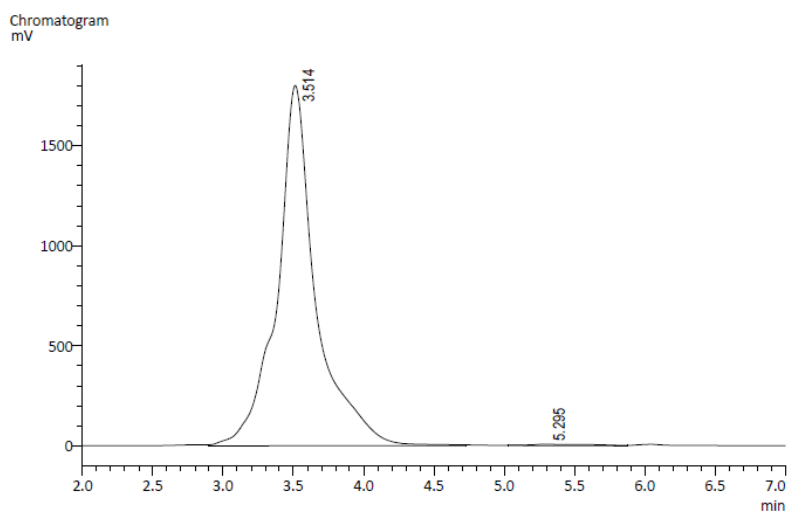

<Peak Table>  
Detector A 254nm

| Peak# | Retention Time (min) | Area (mAU*min) | Height (mAU) | Area Ratio (%) |
|-------|----------------------|----------------|--------------|----------------|
| 1     | 3.514                | 34605084       | 1801353      | 99.327         |
| 2     | 5.295                | 234545         | 6693         | 0.673          |
| Total |                      | 34839629       | 1808045      | 100.000        |

**Figure S45.** HPLC traces of racemic **3n** (reference) and chiral **3n**. Area integration =99.3: 0.7 (99% ee).

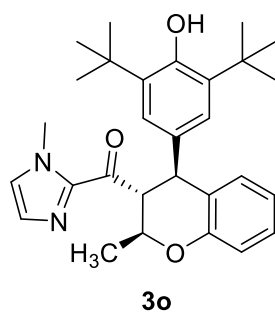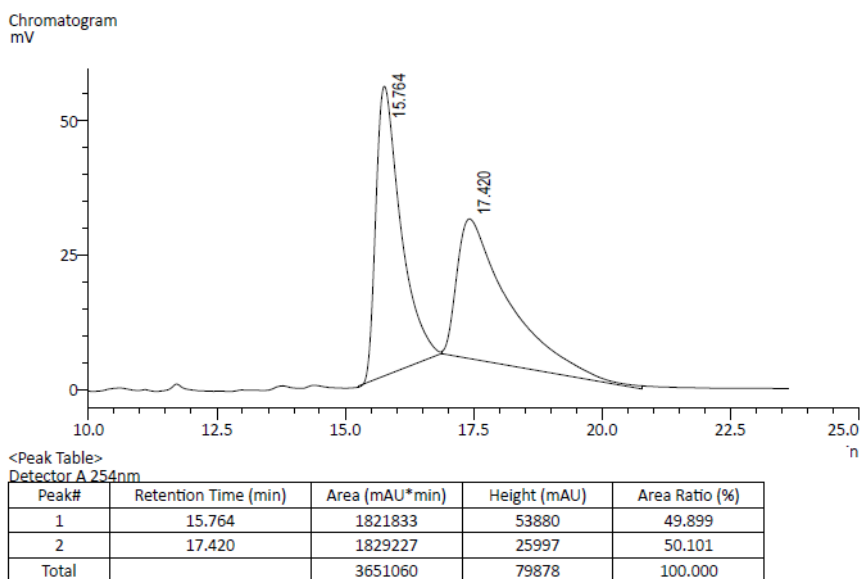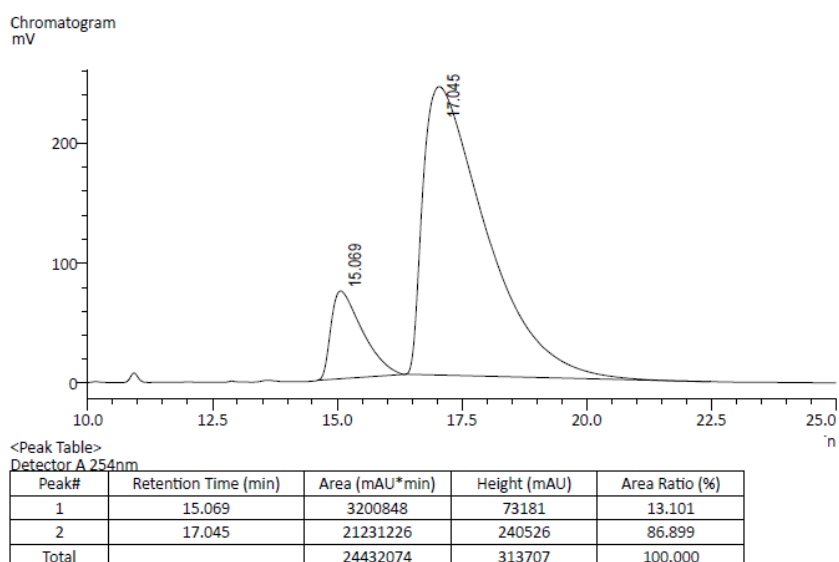

**Figure S46.** HPLC traces of racemic **3o** (reference) and chiral **3o**. Area integration = 13.1:86.7 (74% ee).

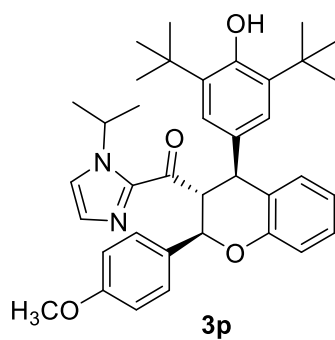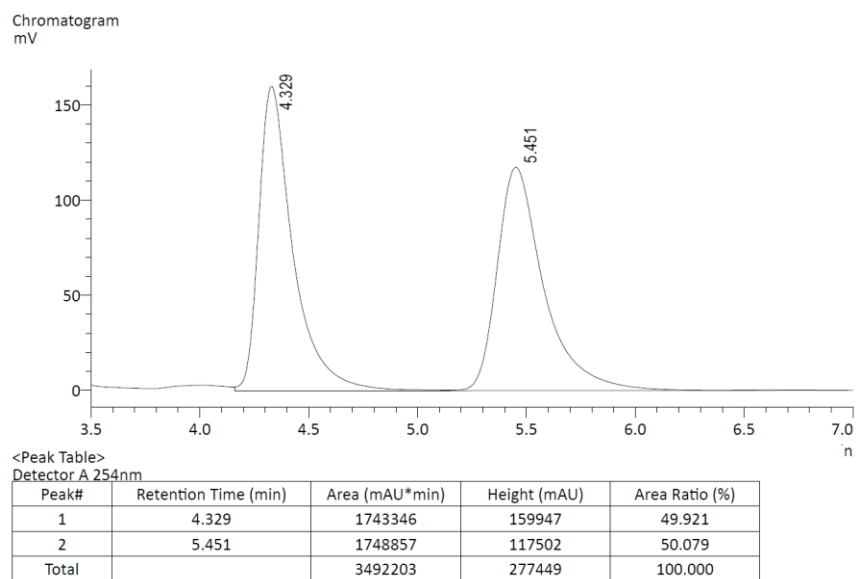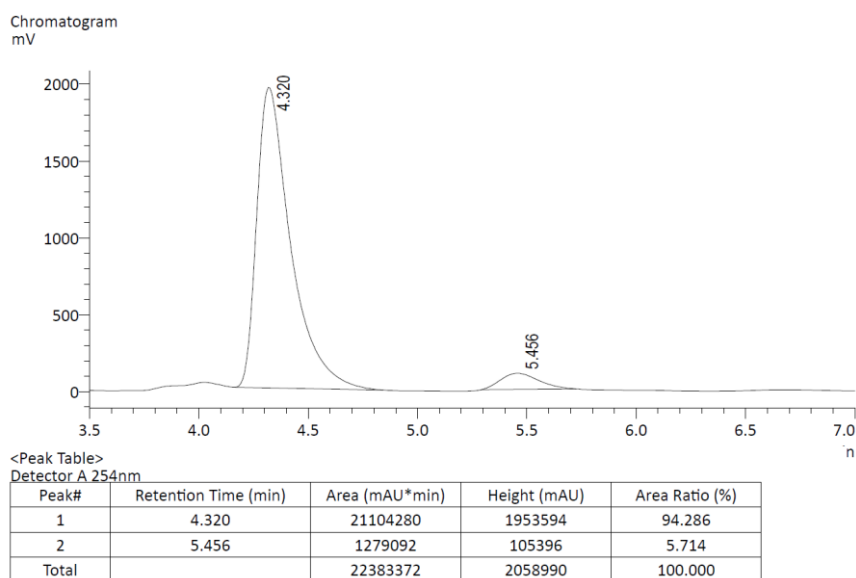

**Figure S47.** HPLC traces of racemic **3p** (reference) and chiral **3p**. Area integration = 94.3:5.7 (89% ee).

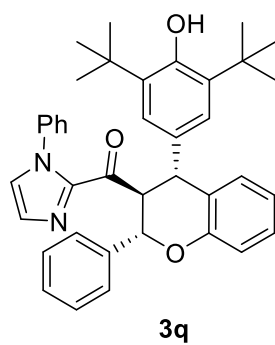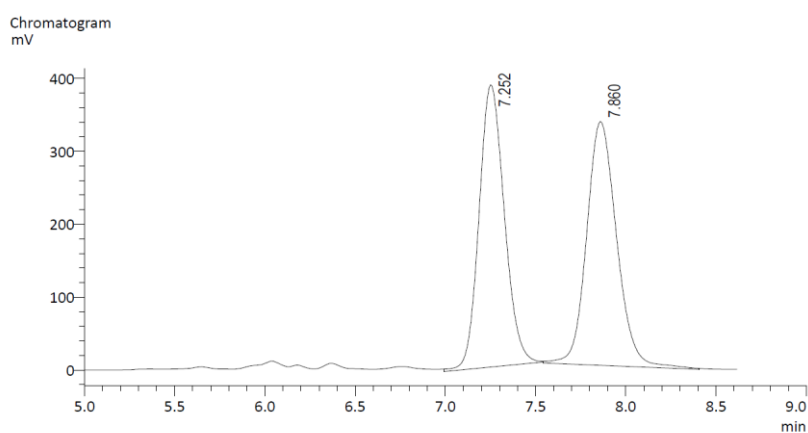

<Peak Table>  
Detector A 254nm

| Peak# | Retention Time (min) | Area (mAU*min) | Height (mAU) | Area Ratio (%) |
|-------|----------------------|----------------|--------------|----------------|
| 1     | 7.252                | 3778886        | 387173       | 49.405         |
| 2     | 7.860                | 3869865        | 334469       | 50.595         |
| Total |                      | 7648751        | 721642       | 100.000        |

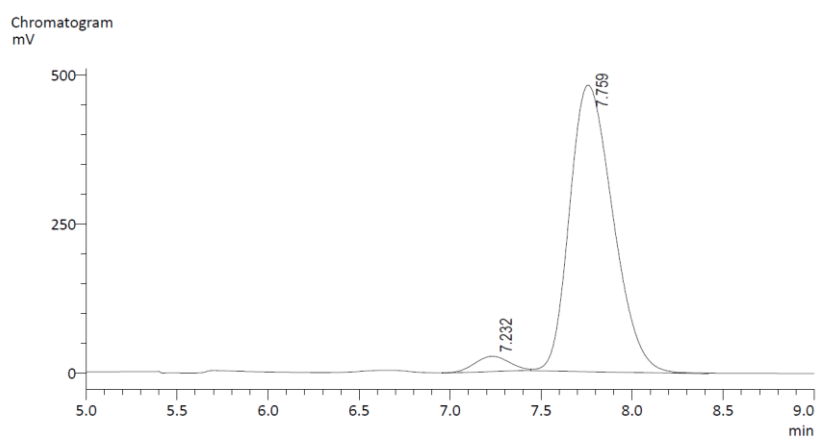

<Peak Table>  
Detector A 254nm

| Peak# | Retention Time (min) | Area (mAU*min) | Height (mAU) | Area Ratio (%) |
|-------|----------------------|----------------|--------------|----------------|
| 1     | 7.232                | 340806         | 25572        | 4.105          |
| 2     | 7.759                | 7962404        | 480851       | 95.895         |
| Total |                      | 8303210        | 506423       | 100.000        |

**Figure S48.** HPLC traces of racemic **3q** (reference) and chiral **3q**. Area integration = 4.1:95.9 (92% ee).



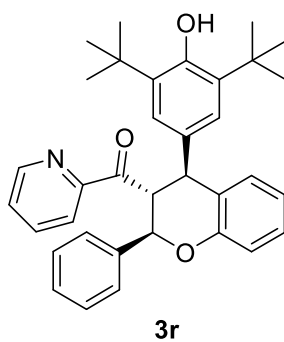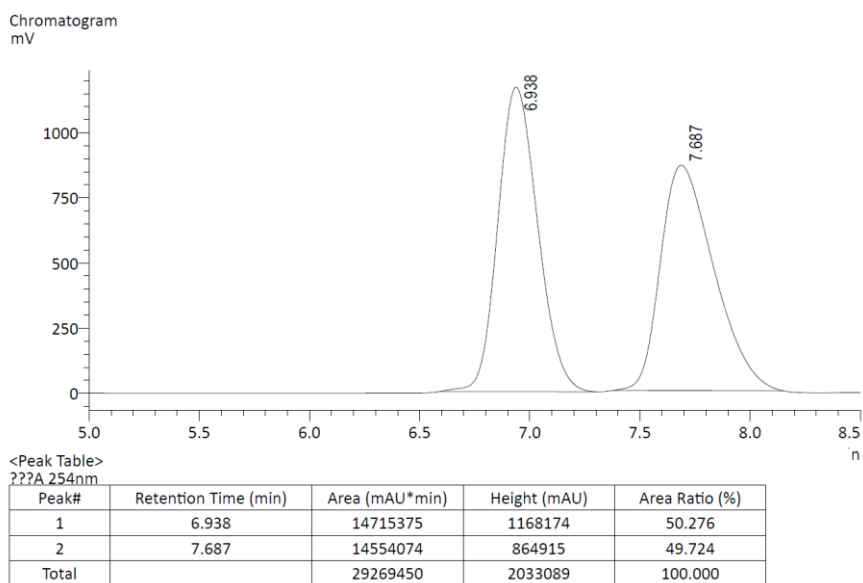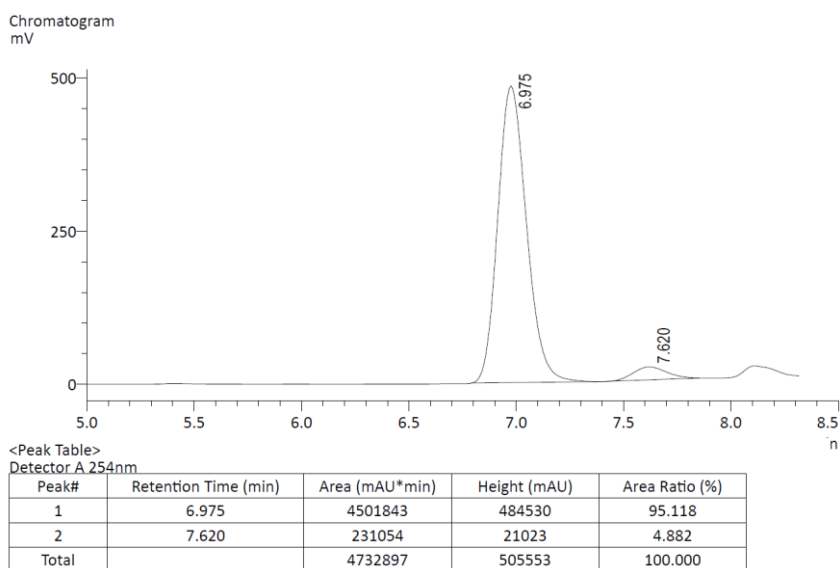

**Figure S49.** HPLC traces of racemic **3r** (reference) and chiral **3r**. Area integration = 95.1: 4.9 (90% ee).

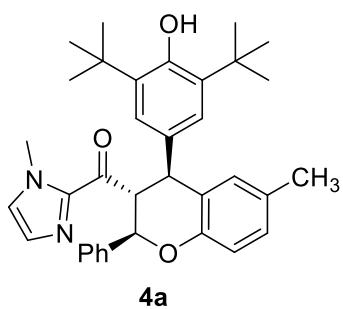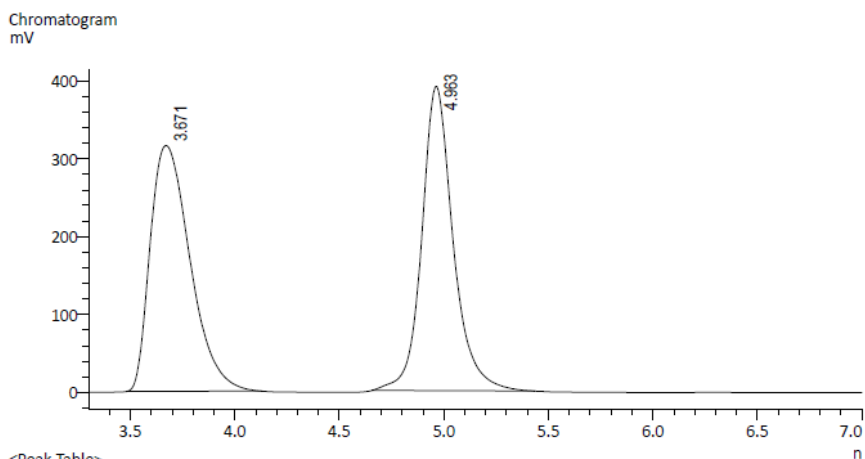

<Peak Table>  
Detector A 254nm

| Peak# | Retention Time (min) | Area (mAU*min) | Height (mAU) | Area Ratio (%) |
|-------|----------------------|----------------|--------------|----------------|
| 1     | 3.671                | 4186557        | 315292       | 50.612         |
| 2     | 4.963                | 4085275        | 390423       | 49.388         |
| Total |                      | 8271832        | 705715       | 100.000        |

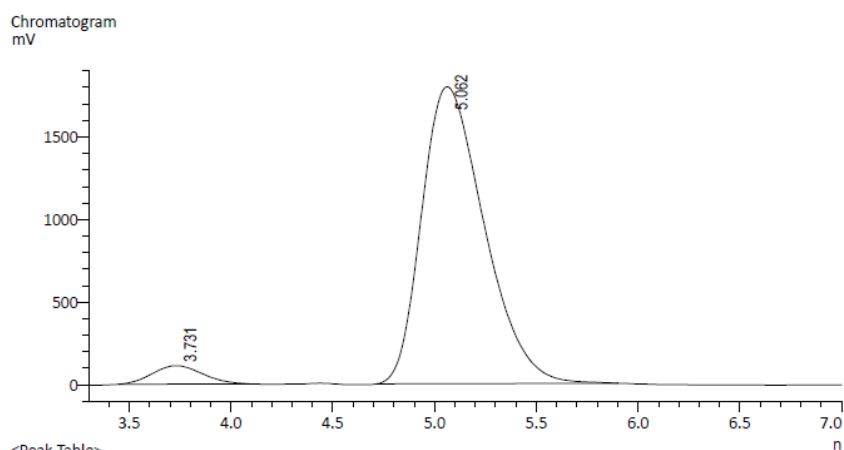

<Peak Table>  
??A 254nm

| Peak# | Retention Time (min) | Area (mAU*min) | Height (mAU) | Area Ratio (%) |
|-------|----------------------|----------------|--------------|----------------|
| 1     | 3.731                | 1903299        | 111553       | 4.722          |
| 2     | 5.062                | 38405687       | 1797854      | 95.278         |
| Total |                      | 40308986       | 1909407      | 100.000        |

**Figure S50.** HPLC traces of racemic **4a** (reference) and chiral **4a**. Area integration = 4.7:95.3 (91% ee).

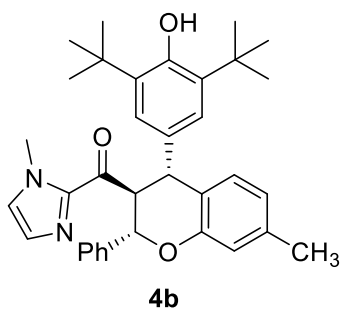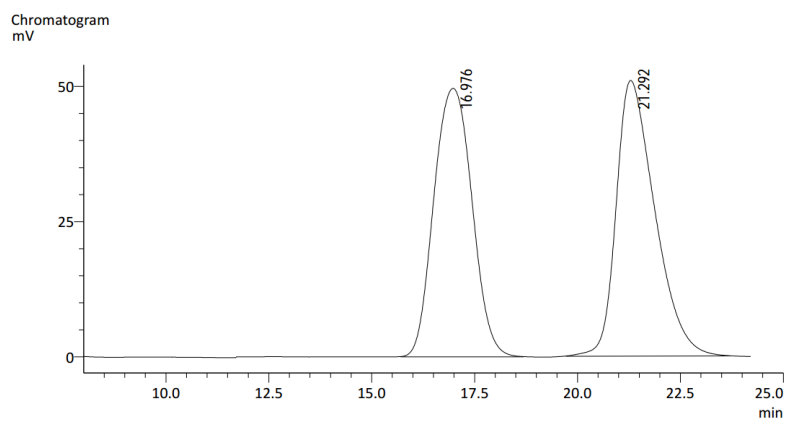

<Peak Table>  
Detector A 254nm

| Peak# | Retention Time (min) | Area (mAU*min) | Height (mAU) | Area Ratio (%) |
|-------|----------------------|----------------|--------------|----------------|
| 1     | 16.976               | 3208245        | 49629        | 49.056         |
| 2     | 21.292               | 3331700        | 50963        | 50.944         |
| Total |                      | 6539945        | 100592       | 100.000        |

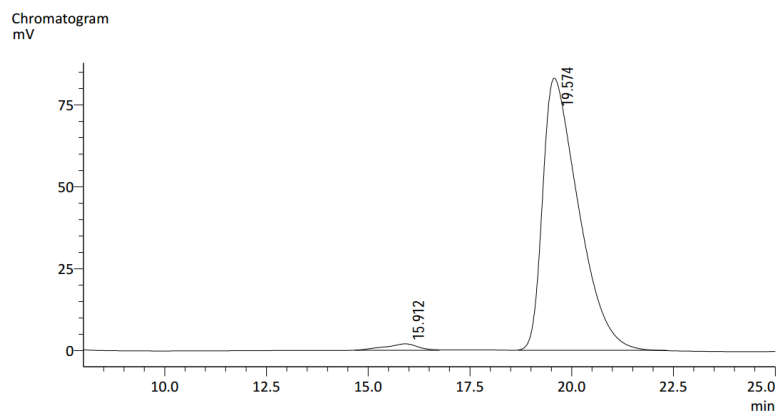

<Peak Table>  
Detector A 254nm

| Peak# | Retention Time (min) | Area (mAU*min) | Height (mAU) | Area Ratio (%) |
|-------|----------------------|----------------|--------------|----------------|
| 1     | 15.912               | 111497         | 1972         | 2.142          |
| 2     | 19.574               | 5094881        | 83052        | 97.858         |
| Total |                      | 5206378        | 85024        | 100.000        |

**Figure S51.** HPLC traces of racemic **4b** (reference) and chiral **4b**. Area integration = 2.1:97.8 (96% ee).

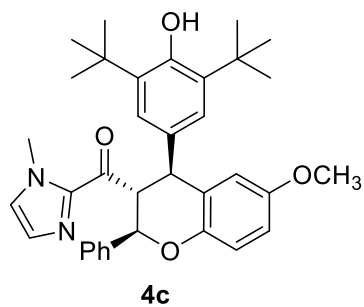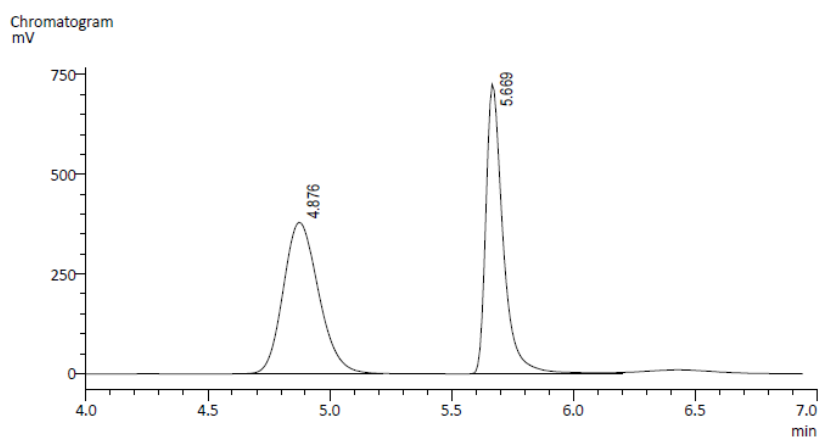

<Peak Table>

Detector A 254nm

| Peak# | Retention Time (min) | Area (mAU*min) | Height (mAU) | Area Ratio (%) |
|-------|----------------------|----------------|--------------|----------------|
| 1     | 4.876                | 3804628        | 378724       | 51.420         |
| 2     | 5.669                | 3594492        | 725362       | 48.580         |
| Total |                      | 7399120        | 1104086      | 100.000        |

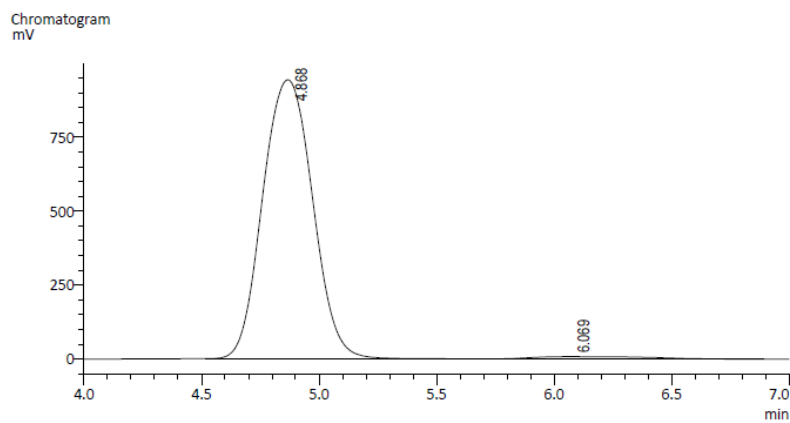

<Peak Table>

Detector A 254nm

| Peak# | Retention Time (min) | Area (mAU*min) | Height (mAU) | Area Ratio (%) |
|-------|----------------------|----------------|--------------|----------------|
| 1     | 4.868                | 14005900       | 944191       | 98.010         |
| 2     | 6.069                | 284368         | 8279         | 1.990          |
| Total |                      | 14290268       | 952470       | 100.000        |

**Figure S52.** HPLC traces of racemic **4c** (reference) and chiral **4c**. Area integration = 98.0:2.0 (96% ee).

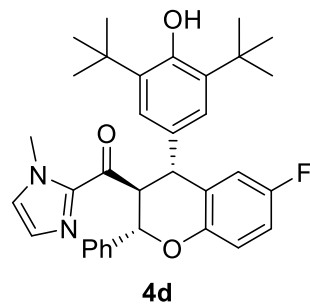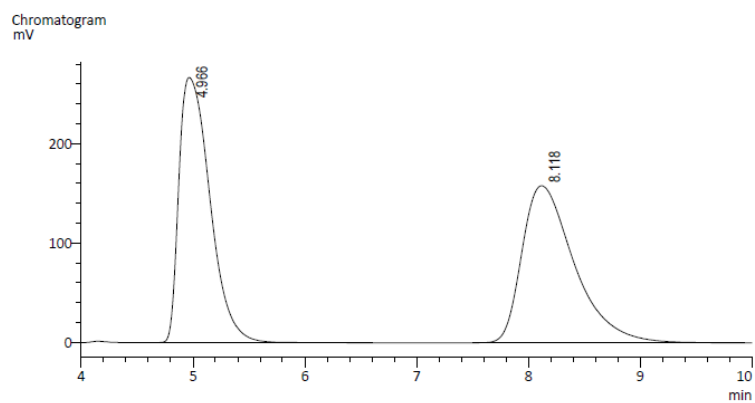

<Peak Table>  
Detector A 254nm

| Peak# | Retention Time (min) | Area (mAU*min) | Height (mAU) | Area Ratio (%) |
|-------|----------------------|----------------|--------------|----------------|
| 1     | 4.966                | 5155208        | 267034       | 50.073         |
| 2     | 8.118                | 5140224        | 157997       | 49.927         |
| Total |                      | 10295432       | 425032       | 100.000        |

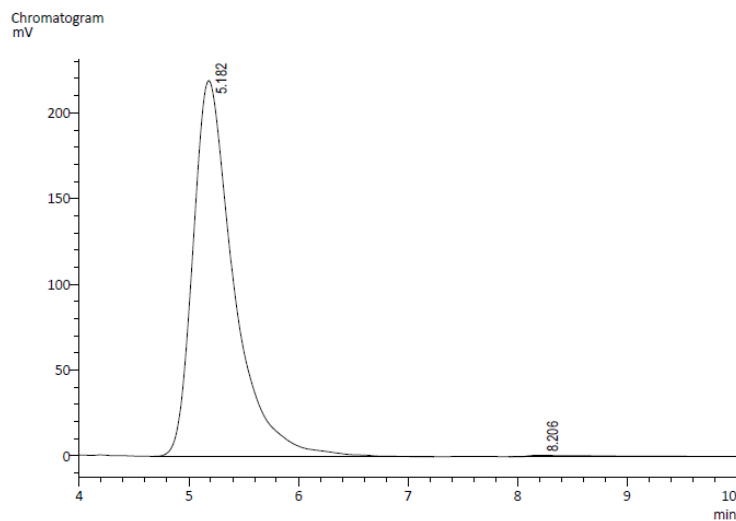

<Peak Table>  
Detector A 254nm

| Peak# | Retention Time (min) | Area (mAU*min) | Height (mAU) | Area Ratio (%) |
|-------|----------------------|----------------|--------------|----------------|
| 1     | 5.182                | 5660992        | 219239       | 99.496         |
| 2     | 8.206                | 28687          | 692          | 0.504          |
| Total |                      | 5689679        | 219931       | 100.000        |

**Figure S53.** HPLC traces of racemic **4d** (reference) and chiral **4d**. Area integration = 99.5:0.5 (99% ee).

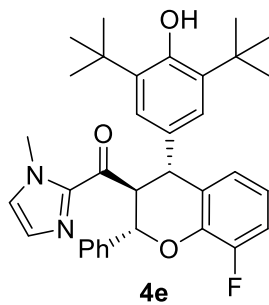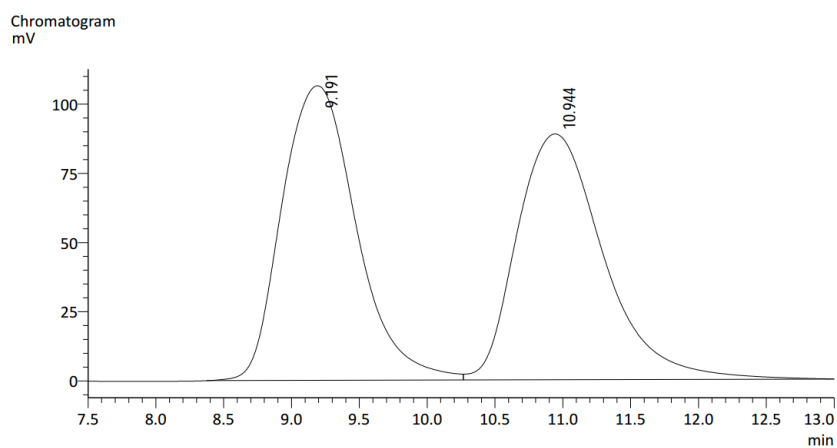

<Peak Table>  
Detector A 254nm

| Peak# | Retention Time (min) | Area (mAU*min) | Height (mAU) | Area Ratio (%) |
|-------|----------------------|----------------|--------------|----------------|
| 1     | 9.191                | 4060533        | 106389       | 50.697         |
| 2     | 10.944               | 3948830        | 88770        | 49.303         |
| Total |                      | 8009364        | 195159       | 100.000        |

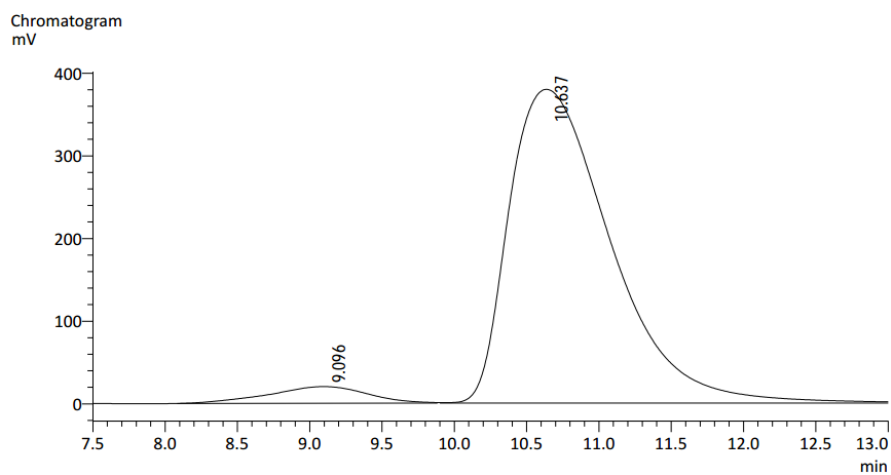

<Peak Table>  
Detector A 254nm

| Peak# | Retention Time (min) | Area (mAU*min) | Height (mAU) | Area Ratio (%) |
|-------|----------------------|----------------|--------------|----------------|
| 1     | 9.096                | 953861         | 20142        | 4.884          |
| 2     | 10.637               | 18576884       | 379544       | 95.116         |
| Total |                      | 19530745       | 399686       | 100.000        |

**Figure S54.** HPLC traces of racemic **4e** (reference) and chiral **4e**. Area integration = 4.9:95.1 (90% ee).

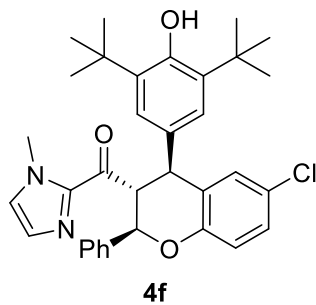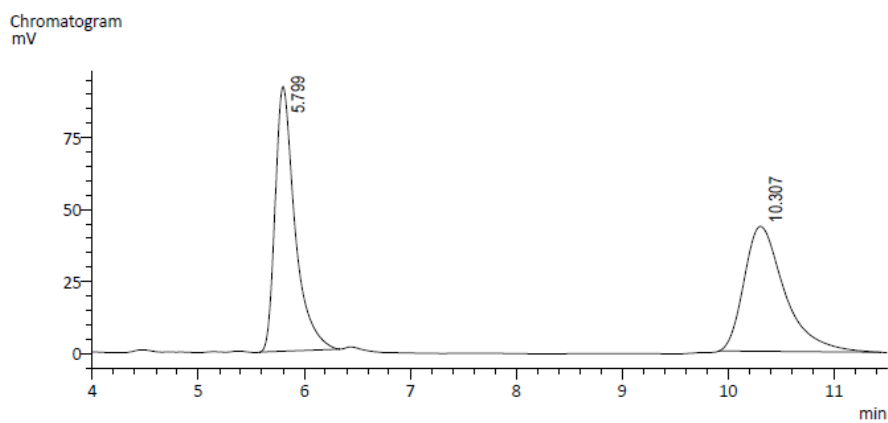

<Peak Table>  
Detector A 254nm

| Peak# | Retention Time (min) | Area (mAU*min) | Height (mAU) | Area Ratio (%) |
|-------|----------------------|----------------|--------------|----------------|
| 1     | 5.799                | 1192170        | 91850        | 50.827         |
| 2     | 10.307               | 1153374        | 43324        | 49.173         |
| Total |                      | 2345544        | 135173       | 100.000        |

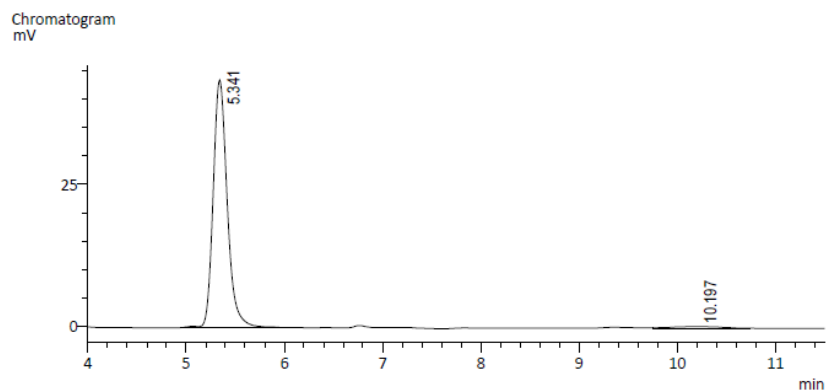

<Peak Table>  
Detector A 254nm

| Peak# | Retention Time (min) | Area (mAU*min) | Height (mAU) | Area Ratio (%) |
|-------|----------------------|----------------|--------------|----------------|
| 1     | 5.341                | 434930         | 43539        | 97.788         |
| 2     | 10.197               | 9836           | 293          | 2.212          |
| Total |                      | 444767         | 43831        | 100.000        |

**Figure S55.** HPLC traces of racemic **4f** (reference) and chiral **4f**. Area integration = 97.8:2.2 (96% ee).

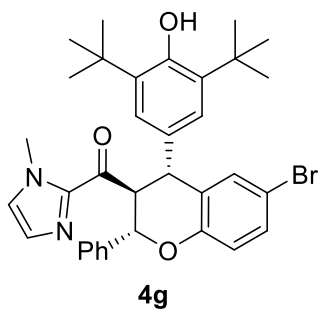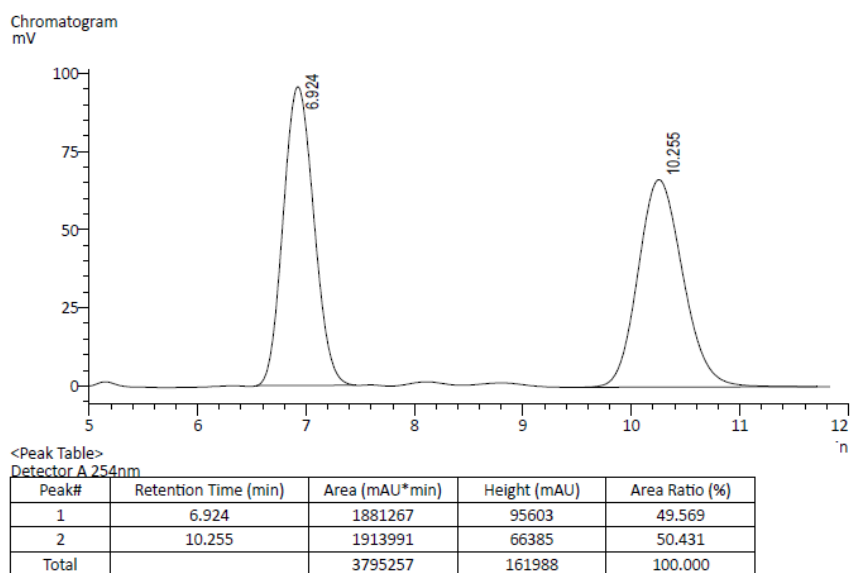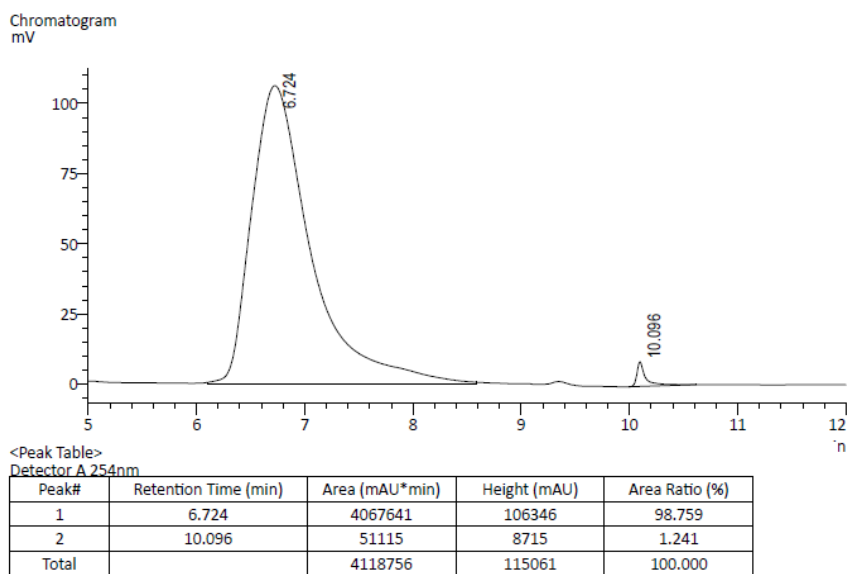

**Figure S56.** HPLC traces of racemic **4g** (reference) and chiral **4g**. Area integration = 98.8:1.2 (98% ee).



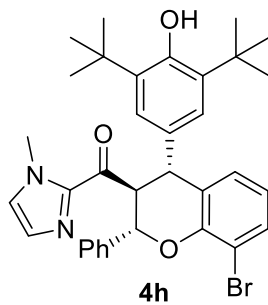

Chromatogram  
mV

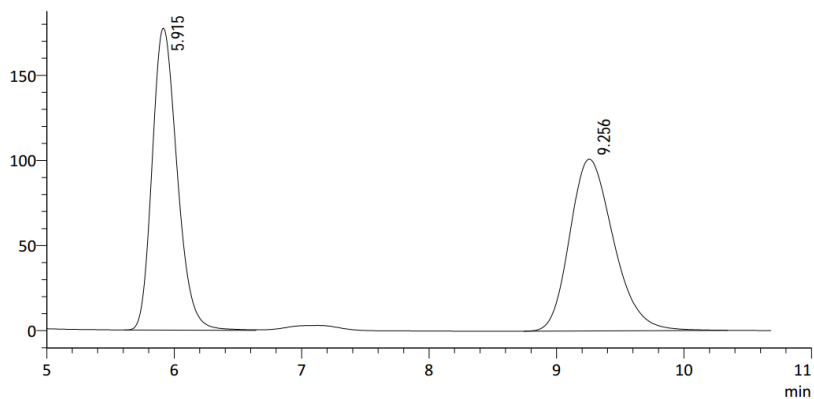

<Peak Table>  
Detector A 254nm

| Peak# | Retention Time (min) | Area (mAU*min) | Height (mAU) | Area Ratio (%) |
|-------|----------------------|----------------|--------------|----------------|
| 1     | 5.915                | 2413340        | 177438       | 50.030         |
| 2     | 9.256                | 2410414        | 100913       | 49.970         |
| Total |                      | 4823754        | 278351       | 100.000        |

Chromatogram  
mV

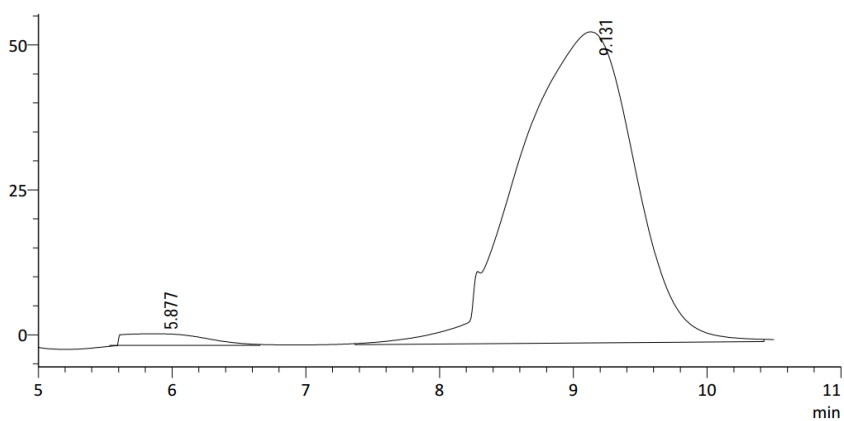

<Peak Table>  
Detector A 254nm

| Peak# | Retention Time (min) | Area (mAU*min) | Height (mAU) | Area Ratio (%) |
|-------|----------------------|----------------|--------------|----------------|
| 1     | 5.877                | 84633          | 1990         | 2.583          |
| 2     | 9.131                | 3192128        | 53648        | 97.417         |
| Total |                      | 3276761        | 55638        | 100.000        |

**Figure S57.** HPLC traces of racemic **4h** (reference) and chiral **4h**. Area integration = 2.6:97.4 (95% ee).

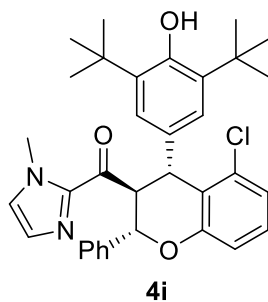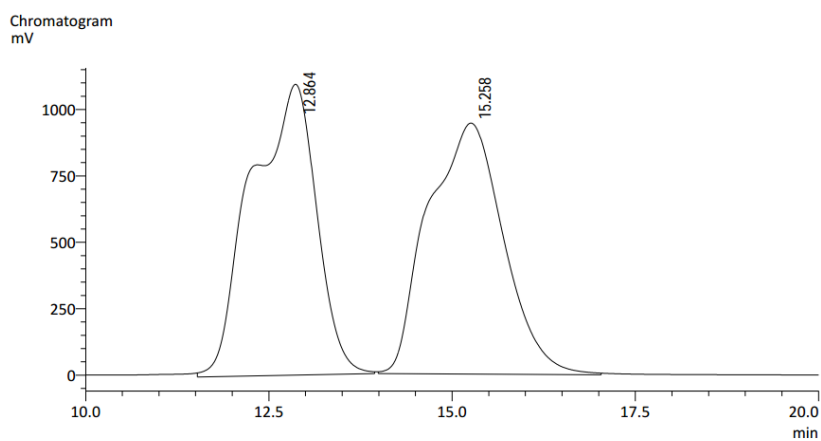

<Peak Table>  
Detector A 254nm

| Peak# | Retention Time (min) | Area (mAU*min) | Height (mAU) | Area Ratio (%) |
|-------|----------------------|----------------|--------------|----------------|
| 1     | 12.864               | 67772509       | 1095023      | 50.107         |
| 2     | 15.258               | 67483412       | 945096       | 49.893         |
| Total |                      | 135255921      | 2040119      | 100.000        |

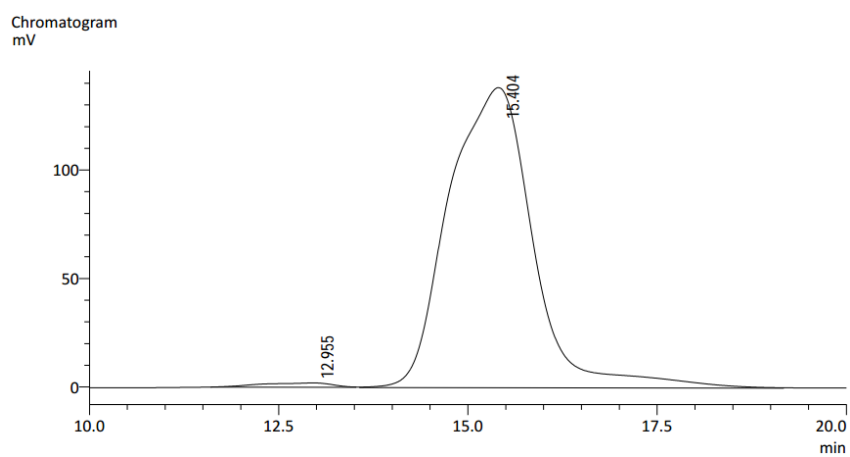

<Peak Table>  
Detector A 254nm

| Peak# | Retention Time (min) | Area (mAU*min) | Height (mAU) | Area Ratio (%) |
|-------|----------------------|----------------|--------------|----------------|
| 1     | 12.955               | 134051         | 2009         | 1.235          |
| 2     | 15.404               | 10719596       | 138320       | 98.765         |
| Total |                      | 10853647       | 140329       | 100.000        |

**Figure S58.** HPLC traces of racemic **4i** (reference) and chiral **4i**. Area integration = 1.2:98.8 (98% ee).

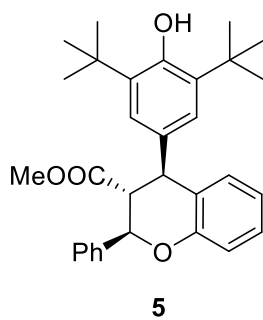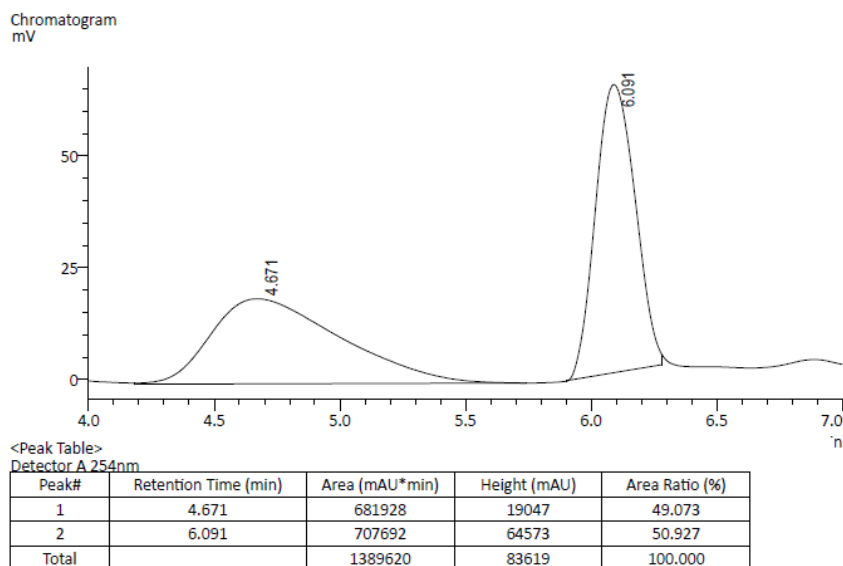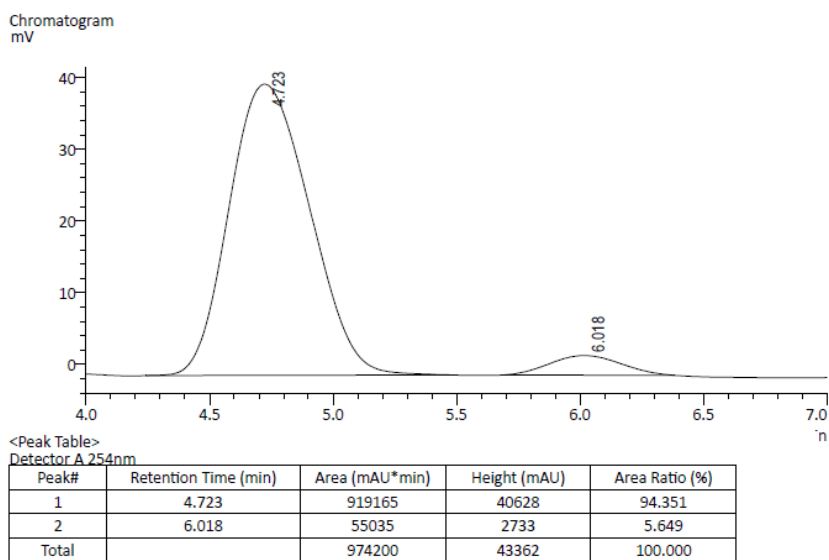

**Figure S59.** HPLC traces of racemic **5** (reference) and chiral **5**. Area integration = 94.4:5.6 (89% ee).

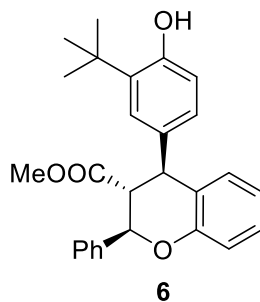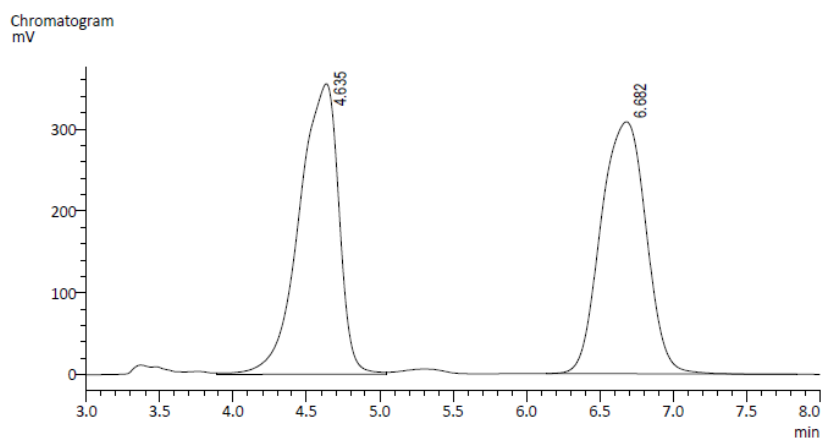

<Peak Table>

Detector A 254nm

| Peak# | Retention Time (min) | Area (mAU*min) | Height (mAU) | Area Ratio (%) |
|-------|----------------------|----------------|--------------|----------------|
| 1     | 4.635                | 6665766        | 354820       | 50.272         |
| 2     | 6.682                | 6593554        | 307819       | 49.728         |
| Total |                      | 13259320       | 662638       | 100.000        |

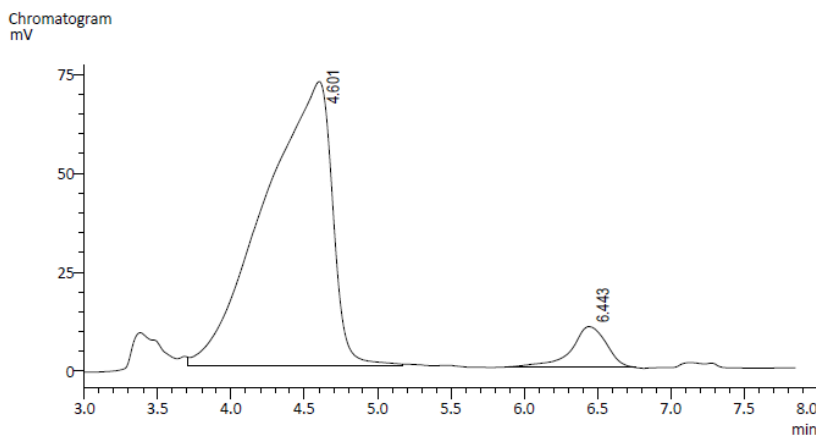

<Peak Table>

Detector A 254nm

| Peak# | Retention Time (min) | Area (mAU*min) | Height (mAU) | Area Ratio (%) |
|-------|----------------------|----------------|--------------|----------------|
| 1     | 4.601                | 2303265        | 71801        | 92.905         |
| 2     | 6.443                | 175888         | 10344        | 7.095          |
| Total |                      | 2479152        | 82145        | 100.000        |

**Figure S60.** HPLC traces of racemic **6** (reference) and chiral **6**. Area integration = 92.9:7.1 (86% ee).

## 8. Single Crystal X-Ray Diffraction Studies

The single crystal for compound **3k** was prepared from a mixture solvent of ethyl acetate and *n*-hexane (*v/v* = 3:1). The data were collected on a Bruker APEX-II CCD equipped with molybdenum micro-focus X-ray sources ( $\lambda = 0.71073 \text{ \AA}$ ) at 299 K. The crystal structures were resolved by direct methods and all calculations were performed on the SHELXL-97 program package. All non-hydrogen atoms were refined anisotropically. Hydrogen atoms were added in the riding model and refined with isotropic thermal parameters. The absolute configuration of **3k** was determined as (2*R*, 3*R*, 4*S*) based on its single crystal X-ray analysis. The structure is shown in **Figure S51**. The detailed information is listed in the **Table S1**. Crystallographic data for **3k** has been deposited with the Cambridge Crystallographic Data Centre as supplementary publication number **CCDC 2118016**. These data can be obtained free of charge from The Cambridge Crystallographic Data Centre via [www.ccdc.cam.ac.uk/data\\_request/cif](http://www.ccdc.cam.ac.uk/data_request/cif).

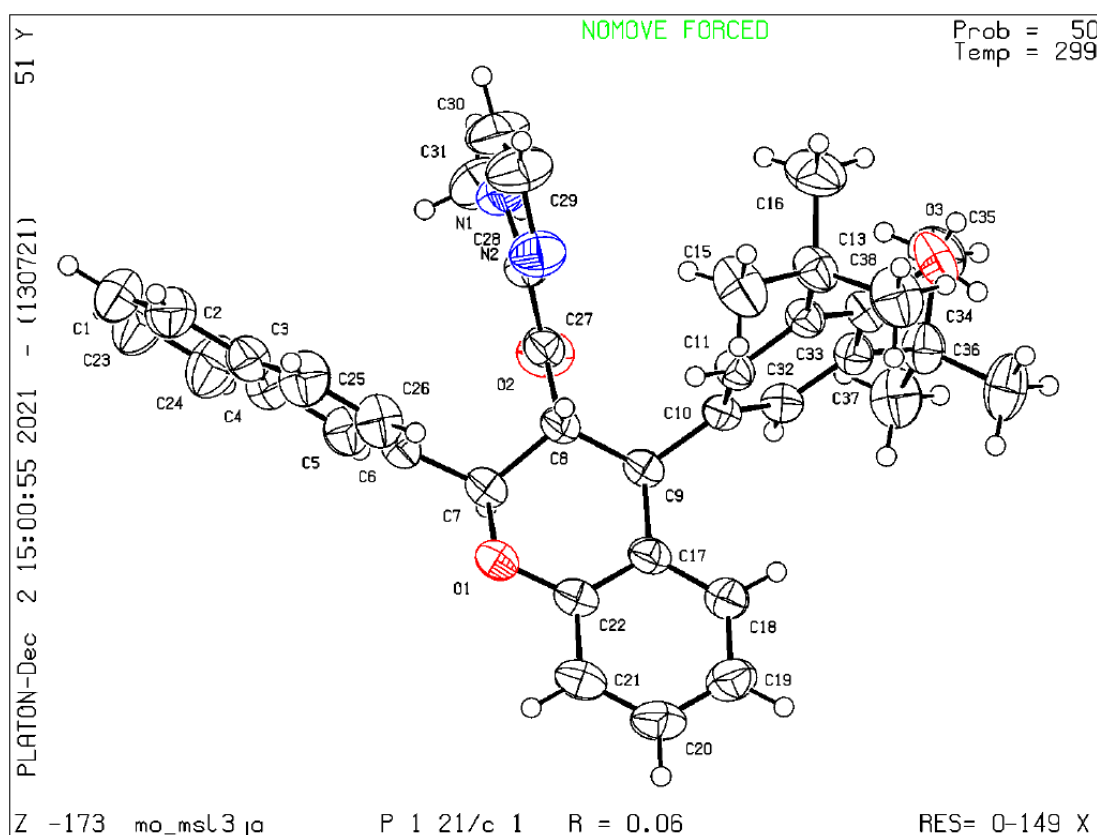

**Figure S51.** Crystal structure of **3k** to verify absolute configuration.

**Table S1.** Crystal data and structure refinement for compound **3k**.

|                                |                                                                                |                                        |              |
|--------------------------------|--------------------------------------------------------------------------------|----------------------------------------|--------------|
| <b>Bond precision</b>          | <b>C-C = 0.0034 Å</b>                                                          | <b>Z</b>                               | <b>4</b>     |
| <b>Wavelength</b>              | 0.71073 Å                                                                      | <b>Mu (mm<sup>-1</sup>)</b>            | 0.075        |
| <b>Cell</b>                    | a=10.3498(7)<br>α=90<br>b=22.0427(14)<br>β=109.472(3)<br>c=14.8597(10)<br>γ=90 | <b>F000</b>                            | 1224.0       |
|                                |                                                                                | <b>F000'</b>                           | 1224.50      |
|                                |                                                                                | <b>h,k,l<sub>max</sub></b>             | 13, 28, 19   |
| <b>Temperature</b>             | 299 K                                                                          | <b>N<sub>ref</sub></b>                 | 7123         |
| <b>Volume</b>                  | 3196.2(4)                                                                      | <b>T<sub>min</sub>,T<sub>max</sub></b> | 0.657, 0.731 |
| <b>Space group</b>             | P21/c                                                                          | <b>Data completeness</b>               | 0.994        |
| <b>Hall group</b>              | -P 2ybc                                                                        | <b>θ (max)</b>                         | 27.244       |
| <b>Moiety formula</b>          | C <sub>38</sub> H <sub>40</sub> N <sub>2</sub> O <sub>3</sub>                  | <b>R(reflections)</b>                  | 0.0578(5221) |
| <b>Sum formula</b>             | C <sub>38</sub> H <sub>40</sub> N <sub>2</sub> O <sub>3</sub>                  | <b>wR2(reflections)</b>                | 0.1731(7123) |
| <b>Mr</b>                      | 572.72                                                                         | <b>S</b>                               | 1.053        |
| <b>Dx, g (cm<sup>-3</sup>)</b> | 1.190                                                                          | <b>Npar</b>                            | 395          |

## 9. References

- [1] Wang, C.; Chen, L.-A.; Huo, H.; Shen, X.; Harms, K.; Gong, L.; Meggers, E. *Chem. Sci.* **2015**, *6*, 1094-1100.
- [2] Gong, J.; Li, S.-W.; Saira, Q.; Kang, Q. *Eur. J. Org. Chem.* **2017**, *25*, 3584-3593.
- [3] Lin, S.-X.; Sun, G.-J.; Kang, Q. *Chem. Commun.* **2017**, *53*, 7665-7668.
- [4] Huo, H.; Fu, C.; Harms, K.; Meggers, E. *J. Am. Chem. Soc.* **2014**, *136*, 2990-2993.
- [5] Mukherjee, S.; Mondal, S.; Patra, A.; Gonnade, R. G.; Biju, A. T. *Chem. Commun.* **2015**, *51*, 9559-9562.
- [6] Zhao, K.; Zhi, Y.; Shu, T.; Valkonen, A.; Rissanen, K.; Enders, D. *Angew. Chem., Int. Ed.* **2016**, *55*, 12104-12108.
